# Supplementary material for: The Relevance of Thimet Oligopeptidase in the Regulation of Energy Metabolism and Diet-Induced Obesity
Source: MDPI journal article supplement (doi:10.3390/biom10020321), 2020-02-17

**Table 1. Intracellular peptides identified on inguinal adipose tissue of WT or THOP1<sup>-/-</sup>**

| Precursor Protein name              | Peptide sequence     | RT   | L1_m/z   | L2_m/z   | I_m/z    | H_m/z    | z | T | Avg. mass | SD    | Obs. mass | Theor. mass | ppm   |
|-------------------------------------|----------------------|------|----------|----------|----------|----------|---|---|-----------|-------|-----------|-------------|-------|
| Macrophage migration inhib. factor  | LSELTQQLAQATGKPAQ    | 64,7 | 920,5638 | 922,558  | 924,5377 | 928,5586 | 2 | 2 | 1783,0083 | 0,045 | 1783,008  | 1782,9549   | 29,9  |
| Histone H2A type 1-B                | AQGGVLPNIQAVLLPK     | 96,9 | 837,5191 | 839,5303 | 841,5442 | 845,5635 | 2 | 2 | 1616,9778 | 0,024 | 1616,978  | 1616,9687   | 5,6   |
| Histone H2B type 2-B                | KQVHPDTGISSKAMGImNS  | 37,6 | 701,0305 | 703,054  | 705,0552 | 709,0762 | 3 | 3 | 2016,0107 | 0,041 | 2016,011  | 2015,9792   | 15,6  |
| Elongation factor 2                 | ASVLTAQPRIMEPI       | 80,1 | 777,4376 | 778,4376 | 779,4517 | 781,4618 | 2 | 1 | 1524,836  | 0,014 | 1524,836  | 1524,8407   | -3,12 |
| Creatine kinase M-type              | DISNADRLGSSEVEQ      | 49,1 | 824,4038 | 825,4003 | 826,4043 | 828,4151 | 2 | 1 | 1618,7534 | 0,011 | 1618,753  | 1618,66     | 57,7  |
| Creatine kinase M-type              | DISNADRLGSSEVEQV     | 59,5 | 873,929  | 874,9346 | 875,9405 | 877,9507 | 2 | 1 | 1717,819  | 0,011 | 1717,819  | 1717,8191   | -0,06 |
| Creatine kinase M-type              | IDDHFLFDKPVSPLL      | 99,3 | 906,5032 | 908,5107 | 910,5258 | 914,5468 | 2 | 2 | 1754,9425 | 0,022 | 1754,942  | 1754,9316   | 6,18  |
| Apolipoprotein A-I                  | LETlKTQVQSVIDKA      | 73,2 | 586,3524 | 588,364  | 590,3767 | 594,3958 | 3 | 3 | 1671,9655 | 0,036 | 1671,965  | 1671,948    | 10,5  |
| Apolipoprotein A-II                 | FSSLMNLEEKPAAPAA     | 71,5 | 830,9321 | 832,9461 | 834,9584 | 838,9783 | 2 | 2 | 1603,8067 | 0,024 | 1603,807  | 1603,7989   | 4,83  |
| Apolipoprotein A-II                 | HEQLTPLVRSAGTSLVN    | 60   | 925,5099 | 926,5137 | 927,5212 | 929,5321 | 2 | 1 | 1820,9801 | 0,011 | 1820,98   | 1820,9817   | -0,91 |
| Serum albumin                       | SQTFPNADFAEITKL      | 93,2 | 869,46   | 871,4683 | 873,4811 | 877,4998 | 2 | 2 | 1680,8538 | 0,023 | 1680,854  | 1680,8432   | 6,31  |
| Non-specific lipid-transfer protein | ADSDLLALMTGKMNPQSA   | 99   | 959,9837 | 961,9929 | 964,0899 | 968,0289 | 2 | 2 | 1861,9469 | 0,103 | 1861,947  | 1861,8987   | 25,9  |
| Hemoglobin subunit alpha            | GAEALERMFASFPTTK     | 87,8 | 906,5109 | 908,4832 | 910,4923 | 914,5168 | 2 | 2 | 1754,9008 | 0,033 | 1754,901  | 1754,834    | 38,1  |
| Hemoglobin subunit alpha            | FDVSHGSAQVK          | 24,6 | 615,8264 | 617,8394 | 619,8522 | 623,8708 | 2 | 2 | 1173,5936 | 0,025 | 1173,594  | 1173,5851   | 7,24  |
| Hemoglobin subunit alpha            | IGGHGAEYGAEALER      | 39,5 | 779,3855 | 780,3916 | 781,3956 | 783,4088 | 2 | 1 | 1528,7324 | 0,009 | 1528,732  | 1528,7343   | -1,28 |
| Hemoglobin subunit alpha            | SVSTVLTSK            | 35,3 | 489,298  | 491,3106 | 493,3228 | 497,342  | 2 | 2 | 920,5359  | 0,024 | 920,5359  | 920,5251    | 11,7  |
| Acyl-CoA-binding protein            | QATVGDVNTDRPGLDLKKGK | 58,5 | 727,7425 | 729,7576 | 731,7711 | 735,7884 | 3 | 3 | 2096,1435 | 0,040 | 2096,144  | 2096,1299   | 6,49  |

RT= retention time; m= methionine oxidized; L1 or L2 =Light; I=Intermediary; H=Heavy; z=charge; T= number of tags; SD= standard deviation; Avg=Average mass; Obs=Observed; theor.=theoric

# Mascot Search Results

## Peptide View

MS/MS Fragmentation of **LSELTQQLAQATGKPAQ**

Found in **MIF\_MOUSE** in **SwissProt**, Macrophage migration inhibitory factor OS=Mus musculus GN=Mif PE=1 SV=2

Match to Query 14599: 1847.062548 from(924.538550,2+) intensity(2914775.6000) scans(14738-14751) rawscans(sn14738:sn14751)  
rtinseconds(3887.7387-3890.5887) index(9352)

Title: 9353: Sum of 2 scans in range 14738 (rt=3887.74) to 14751 (rt=3890.59) [D:\Users\Mayara - HMS Fusion

data\170711PESSAM02977\_May1.raw]

Data file 170711PESSAM02977\_May1.temp.mgf

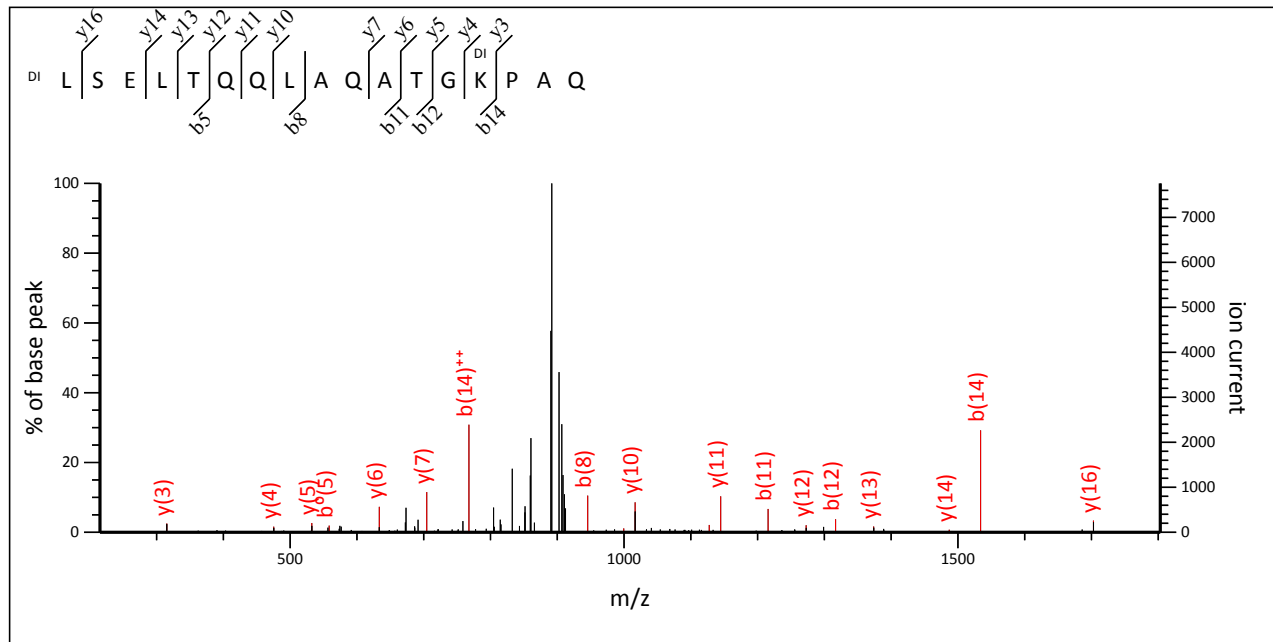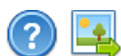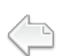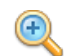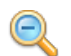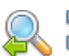

215.18 to 1803.06

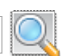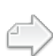

Label all possible matches ☐ Label matches used for scoring ☒

Monoisotopic mass of neutral peptide Mr(calc): 1847.0604

Variable modifications:

N-term : Dimethyl:2H(4) (N-term)

K14 : Dimethyl:2H(4) (K)

Ions Score: 103 Expect: 1.3e-008

Matches : 26/170 fragment ions using 26 most intense peaks ([help](#))

| #  | b         | b <sup>++</sup> | b <sup>*</sup> | b <sup>*++</sup> | b <sup>0</sup> | b <sup>0++</sup> | Seq. | y         | y <sup>++</sup> | y <sup>*</sup> | y <sup>*++</sup> | y <sup>0</sup> | y <sup>0++</sup> | #  |
|----|-----------|-----------------|----------------|------------------|----------------|------------------|------|-----------|-----------------|----------------|------------------|----------------|------------------|----|
| 1  | 146.1477  | 73.5775         |                |                  |                |                  | L    |           |                 |                |                  |                |                  | 17 |
| 2  | 233.1798  | 117.0935        |                |                  | 215.1692       | 108.0882         | S    | 1702.9272 | 851.9672        | 1685.9007      | 843.4540         | 1684.9166      | 842.9620         | 16 |
| 3  | 362.2224  | 181.6148        |                |                  | 344.2118       | 172.6095         | E    | 1615.8952 | 808.4512        | 1598.8686      | 799.9379         | 1597.8846      | 799.4459         | 15 |
| 4  | 475.3064  | 238.1569        |                |                  | 457.2959       | 229.1516         | L    | 1486.8526 | 743.9299        | 1469.8260      | 735.4167         | 1468.8420      | 734.9246         | 14 |
| 5  | 576.3541  | 288.6807        |                |                  | 558.3435       | 279.6754         | T    | 1373.7685 | 687.3879        | 1356.7420      | 678.8746         | 1355.7579      | 678.3826         | 13 |
| 6  | 704.4127  | 352.7100        | 687.3861       | 344.1967         | 686.4021       | 343.7047         | Q    | 1272.7208 | 636.8641        | 1255.6943      | 628.3508         | 1254.7103      | 627.8588         | 12 |
| 7  | 832.4713  | 416.7393        | 815.4447       | 408.2260         | 814.4607       | 407.7340         | Q    | 1144.6623 | 572.8348        | 1127.6357      | 564.3215         | 1126.6517      | 563.8295         | 11 |
| 8  | 945.5553  | 473.2813        | 928.5288       | 464.7680         | 927.5448       | 464.2760         | L    | 1016.6037 | 508.8055        | 999.5771       | 500.2922         | 998.5931       | 499.8002         | 10 |
| 9  | 1016.5924 | 508.7999        | 999.5659       | 500.2866         | 998.5819       | 499.7946         | A    | 903.5196  | 452.2634        | 886.4931       | 443.7502         | 885.5091       | 443.2582         | 9  |
| 10 | 1144.6510 | 572.8291        | 1127.6245      | 564.3159         | 1126.6405      | 563.8239         | Q    | 832.4825  | 416.7449        | 815.4560       | 408.2316         | 814.4719       | 407.7396         | 8  |
| 11 | 1215.6881 | 608.3477        | 1198.6616      | 599.8344         | 1197.6776      | 599.3424         | A    | 704.4239  | 352.7156        | 687.3974       | 344.2023         | 686.4134       | 343.7103         | 7  |
| 12 | 1316.7358 | 658.8715        | 1299.7093      | 650.3583         | 1298.7253      | 649.8663         | T    | 633.3868  | 317.1970        | 616.3603       | 308.6838         | 615.3762       | 308.1918         | 6  |
| 13 | 1373.7573 | 687.3823        | 1356.7307      | 678.8690         | 1355.7467      | 678.3770         | G    | 532.3391  | 266.6732        | 515.3126       | 258.1599         |                |                  | 5  |

|    |           |          |           |          |           |          |   |          |          |          |          |  |  |   |
|----|-----------|----------|-----------|----------|-----------|----------|---|----------|----------|----------|----------|--|--|---|
| 14 | 1533.9087 | 767.4580 | 1516.8821 | 758.9447 | 1515.8981 | 758.4527 | K | 475.3177 | 238.1625 | 458.2911 | 229.6492 |  |  | 4 |
| 15 | 1630.9614 | 815.9843 | 1613.9349 | 807.4711 | 1612.9508 | 806.9791 | P | 315.1663 | 158.0868 | 298.1397 | 149.5735 |  |  | 3 |
| 16 | 1701.9985 | 851.5029 | 1684.9720 | 842.9896 | 1683.9880 | 842.4976 | A | 218.1135 | 109.5604 | 201.0870 | 101.0471 |  |  | 2 |
| 17 |           |          |           |          |           |          | Q | 147.0764 | 74.0418  | 130.0499 | 65.5286  |  |  | 1 |

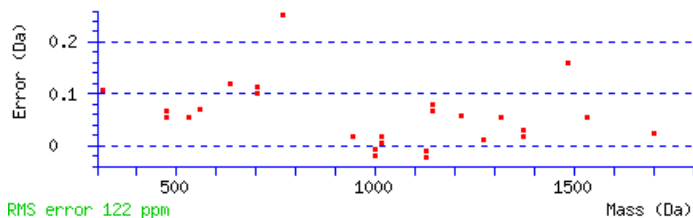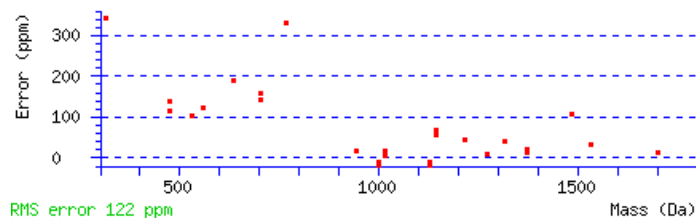

NCBI BLAST search of [LSELTQQLAQATGKPAQ](#)

(Parameters: blastp, nr protein database, expect=20000, no filter, PAM30)

Other BLAST [web gateways](#)

#### All matches to this query

| Score | Mr(calc)  | Delta   | Sequence                                |
|-------|-----------|---------|-----------------------------------------|
| 103.3 | 1847.0604 | 0.0022  | <a href="#">LSELTQQLAQATGKPAQ</a>       |
| 18.4  | 1846.9858 | 0.0768  | <a href="#">SSSFSEIEIQAVVPYR</a>        |
| 15.2  | 1846.9497 | 0.1128  | <a href="#">DSAVSVPTTQANATRRGS</a>      |
| 14.9  | 1846.9930 | 0.0696  | <a href="#">GVGAVPAAAAGSAGAAASLGNAT</a> |
| 14.0  | 1846.9975 | 0.0650  | <a href="#">VFSLTQQPVRMEAAKA</a>        |
| 13.8  | 1846.8692 | 0.1933  | <a href="#">EDLEMRPGDMITLLE</a>         |
| 13.3  | 1846.9887 | 0.0738  | <a href="#">DSSITGELEKQLLQAN</a>        |
| 13.1  | 1847.0780 | -0.0154 | <a href="#">ALCLQTQLLPYLALLT</a>        |
| 12.6  | 1846.9207 | 0.1419  | <a href="#">ELLRMGEVQTAQDNR</a>         |
| 12.3  | 1847.0040 | 0.0585  | <a href="#">LEWAASSVEVTAVAAKN</a>       |

Mascot: <http://www.matrixscience.com/>

# LSELTQQQLAQATGKPAQ

170711PESSAM02977\_May1 #14602-14797 RT: 64.34-64.91 AV: 10 NL: 3,18E5  
T: FTMS + p NSI Full ms [395,00-1800,00]

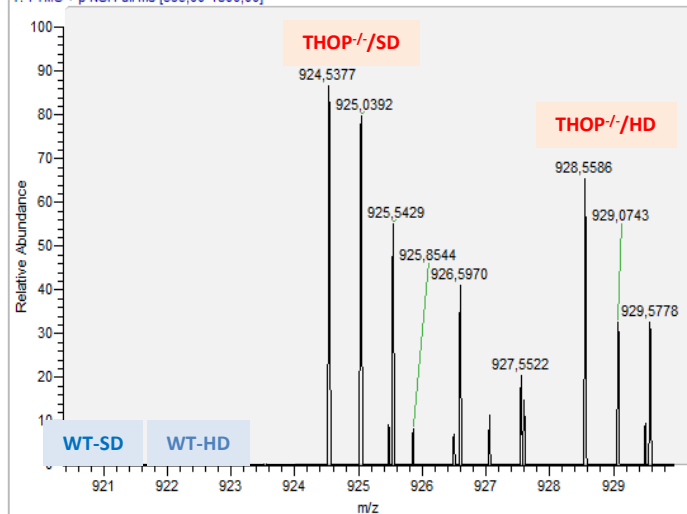

170711PESSAM02978\_May2 #14113-14267 RT: 63.68-64.19 AV: 8 NL: 3,67E5  
T: FTMS + p NSI Full ms [395,00-1800,00]

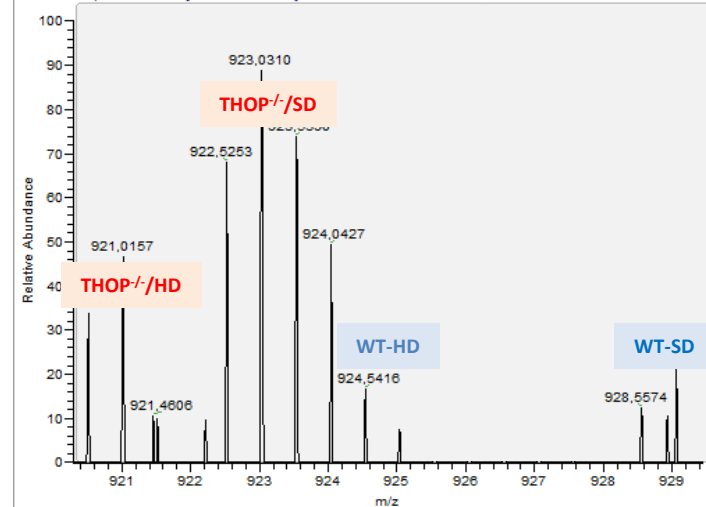

170711PESSAM02981\_May5 #13459-13596 RT: 59.97-60.38 AV: 8 NL: 7,08E5  
T: FTMS + p NSI Full ms [395,00-1800,00]

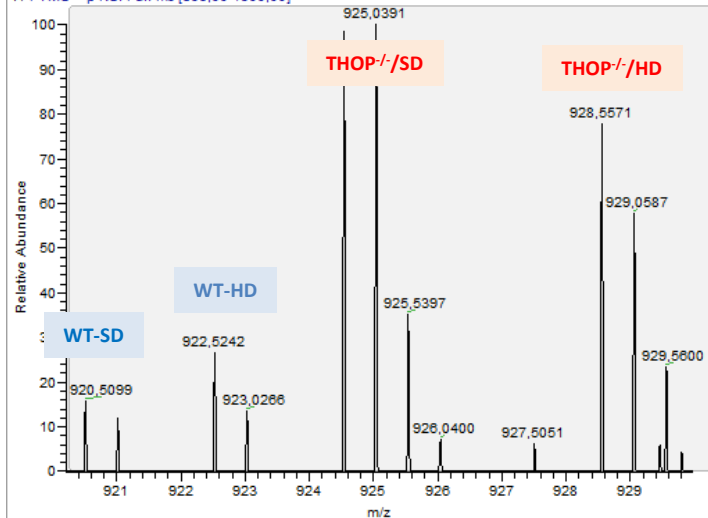

170711PESSAM02982\_May6 #13598-13790 RT: 64.37-64.99 AV: 10 NL: 3,63E5  
T: FTMS + p NSI Full ms [395,00-1800,00]

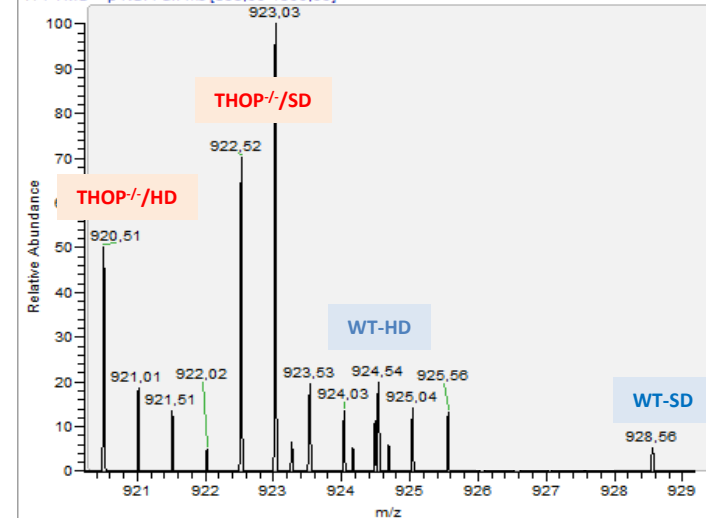

# LSELTQQLAQTGKPAQ

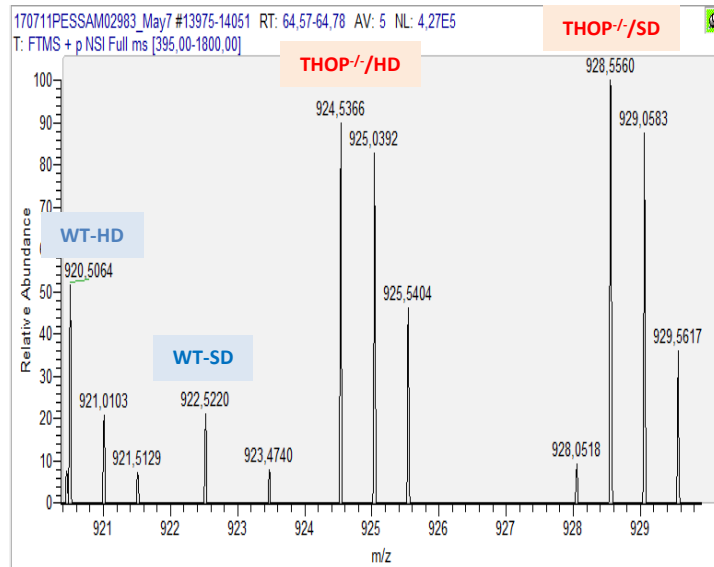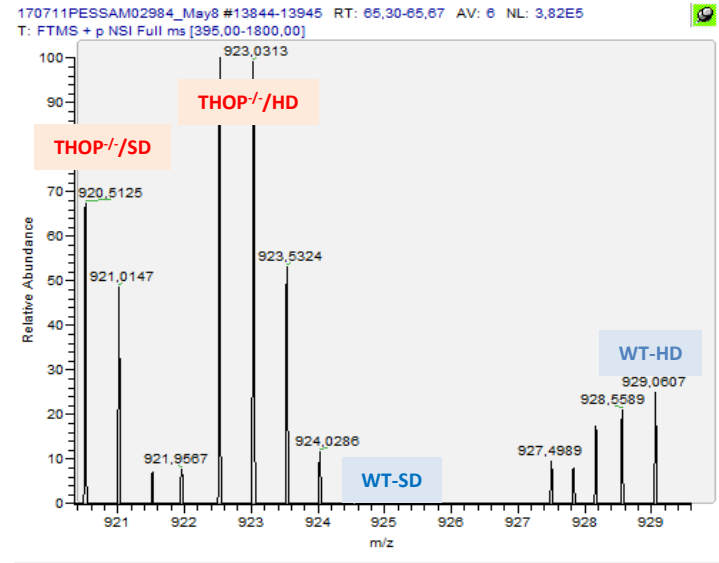

# Mascot Search Results

## Peptide View

MS/MS Fragmentation of **AQGGVLPNIQAVLLPK**

Found in **H2A2B\_MOUSE** in **SwissProt**, Histone H2A type 2-B OS=Mus musculus GN=Hist2h2ab PE=1 SV=3

Match to Query 12540: 1681.073268 from(841.543910,2+) intensity(2031343.0000) scans(22590-22787)

rawscans(sn22590:sn22787) rtinseconds(5814.52-5872.8208) index(14871)

Title: 14872: Sum of 2 scans in range 22590 (rt=5814.52) to 22787 (rt=5872.82) [D:\Users\Mayara - HMS Fusion data\170711PESSAM02977\_May1.raw]

Data file 170711PESSAM02977\_May1.temp.mgf

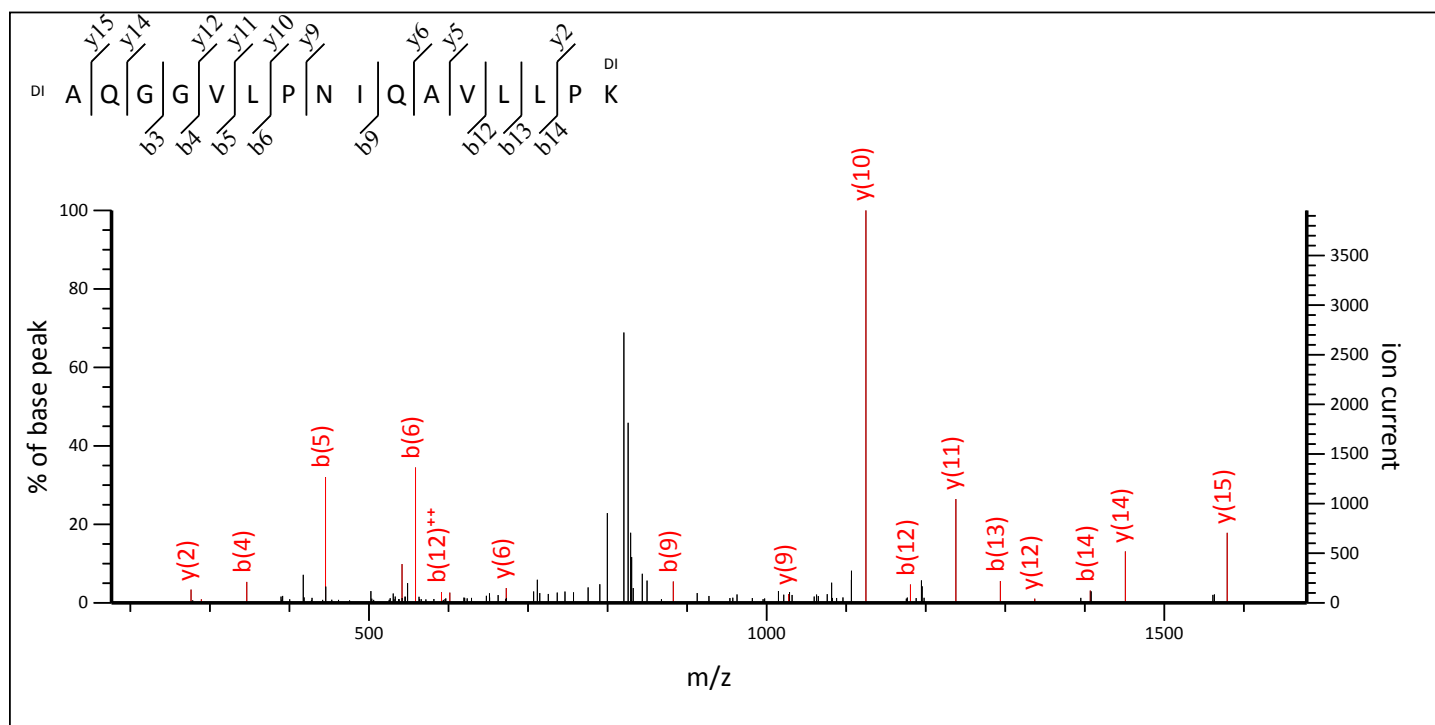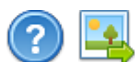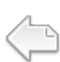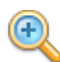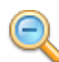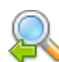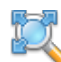

176.3

to 1679.05

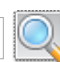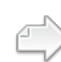

Label all possible matches ☐ Label matches used for scoring ☒

Monoisotopic mass of neutral peptide Mr(calc): 1681.0742

Variable modifications:

N-term : Dimethyl:2H(4) (N-term)

K16 : Dimethyl:2H(4) (K)

Ions Score: 66 Expect: 5.2e-005

Matches : 20/118 fragment ions using 38 most intense peaks ([help](#))

| # | b        | b <sup>++</sup> | b <sup>*</sup> | b <sup>+++</sup> | Seq. | y         | y <sup>++</sup> | y <sup>*</sup> | y <sup>+++</sup> | #  |
|---|----------|-----------------|----------------|------------------|------|-----------|-----------------|----------------|------------------|----|
| 1 | 104.1008 | 52.5540         |                |                  | A    |           |                 |                |                  | 16 |
| 2 | 232.1594 | 116.5833        | 215.1328       | 108.0701         | Q    | 1578.9879 | 789.9976        | 1561.9614      | 781.4843         | 15 |
| 3 | 289.1808 | 145.0941        | 272.1543       | 136.5808         | G    | 1450.9294 | 725.9683        | 1433.9028      | 717.4550         | 14 |
| 4 | 346.2023 | 173.6048        | 329.1758       | 165.0915         | G    | 1393.9079 | 697.4576        | 1376.8814      | 688.9443         | 13 |
| 5 | 445.2707 | 223.1390        | 428.2442       | 214.6257         | V    | 1336.8864 | 668.9469        | 1319.8599      | 660.4336         | 12 |
| 6 | 558.3548 | 279.6810        | 541.3282       | 271.1678         | L    | 1237.8180 | 619.4127        | 1220.7915      | 610.8994         | 11 |
| 7 | 655.4075 | 328.2074        | 638.3810       | 319.6941         | P    | 1124.7340 | 562.8706        | 1107.7074      | 554.3573         | 10 |

|    |                  |                 |           |          |   |                  |          |           |          |   |
|----|------------------|-----------------|-----------|----------|---|------------------|----------|-----------|----------|---|
| 8  | 769.4505         | 385.2289        | 752.4239  | 376.7156 | N | <b>1027.6812</b> | 514.3442 | 1010.6547 | 505.8310 | 9 |
| 9  | <b>882.5345</b>  | 441.7709        | 865.5080  | 433.2576 | I | 913.6383         | 457.3228 | 896.6117  | 448.8095 | 8 |
| 10 | 1010.5931        | 505.8002        | 993.5666  | 497.2869 | Q | 800.5542         | 400.7807 | 783.5277  | 392.2675 | 7 |
| 11 | 1081.6302        | <b>541.3188</b> | 1064.6037 | 532.8055 | A | <b>672.4956</b>  | 336.7515 | 655.4691  | 328.2382 | 6 |
| 12 | <b>1180.6986</b> | <b>590.8530</b> | 1163.6721 | 582.3397 | V | <b>601.4585</b>  | 301.2329 | 584.4320  | 292.7196 | 5 |
| 13 | <b>1293.7827</b> | 647.3950        | 1276.7562 | 638.8817 | L | 502.3901         | 251.6987 | 485.3636  | 243.1854 | 4 |
| 14 | <b>1406.8668</b> | 703.9370        | 1389.8402 | 695.4237 | L | 389.3060         | 195.1567 | 372.2795  | 186.6434 | 3 |
| 15 | 1503.9195        | 752.4634        | 1486.8930 | 743.9501 | P | <b>276.2220</b>  | 138.6146 | 259.1954  | 130.1014 | 2 |
| 16 |                  |                 |           |          | K | 179.1692         | 90.0882  | 162.1427  | 81.5750  | 1 |

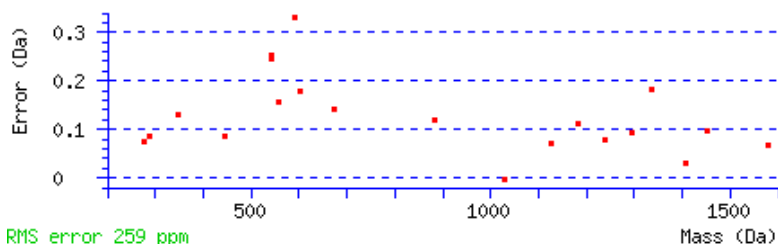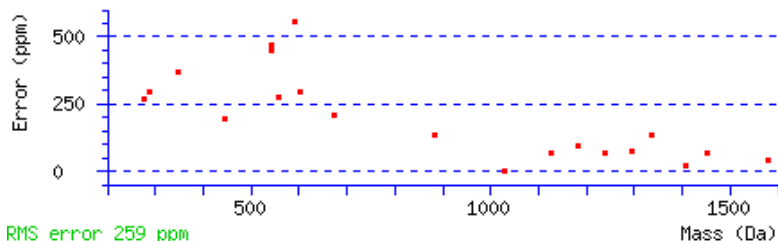

NCBI **BLAST** search of [AQGGVLPNIQAVLLPK](#)

(Parameters: blastp, nr protein database, expect=20000, no filter, PAM30)

Other BLAST [web gateways](#)

#### All matches to this query

| Score | Mr(calc)  | Delta   | Sequence                         |
|-------|-----------|---------|----------------------------------|
| 65.7  | 1681.0742 | -0.0009 | <a href="#">AQGGVLPNIQAVLLPK</a> |
| 19.6  | 1680.8467 | 0.2266  | <a href="#">MDAVLLVIAQTFMDA</a>  |
| 19.4  | 1680.9826 | 0.0906  | <a href="#">AWAAMALTFLLVLLT</a>  |
| 19.4  | 1680.8215 | 0.2518  | <a href="#">MVMPNLYGNIVNNV</a>   |
| 18.5  | 1680.8458 | 0.2275  | <a href="#">TDTGSAEQFDLVILT</a>  |
| 18.1  | 1680.8252 | 0.2481  | <a href="#">AGLEIMEQMALLQE</a>   |
| 18.0  | 1680.7885 | 0.2848  | <a href="#">DSAVPCAMMLELARA</a>  |
| 17.8  | 1680.9484 | 0.1248  | <a href="#">GDDSLKMHVVKILT</a>   |
| 17.5  | 1681.0906 | -0.0173 | <a href="#">IEKLELPLKQKGVG</a>   |
| 17.4  | 1681.0207 | 0.0526  | <a href="#">LRPLELPVTPVIEQ</a>   |

Mascot: <http://www.matrixscience.com/>

# AQGGVLPNIQAVLLPK

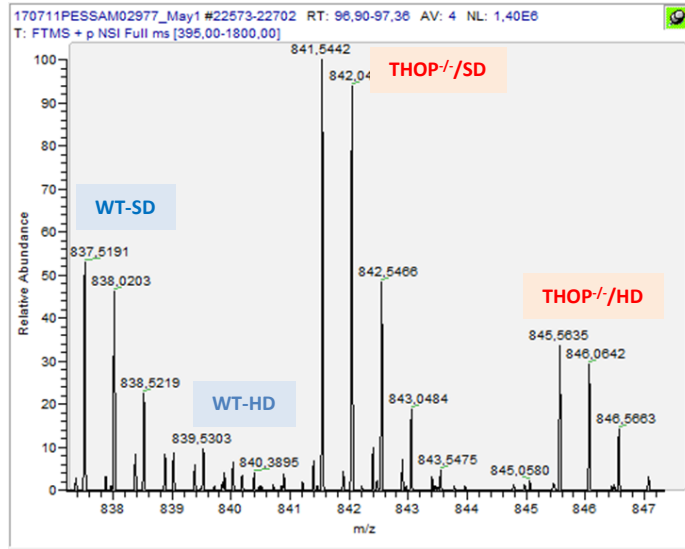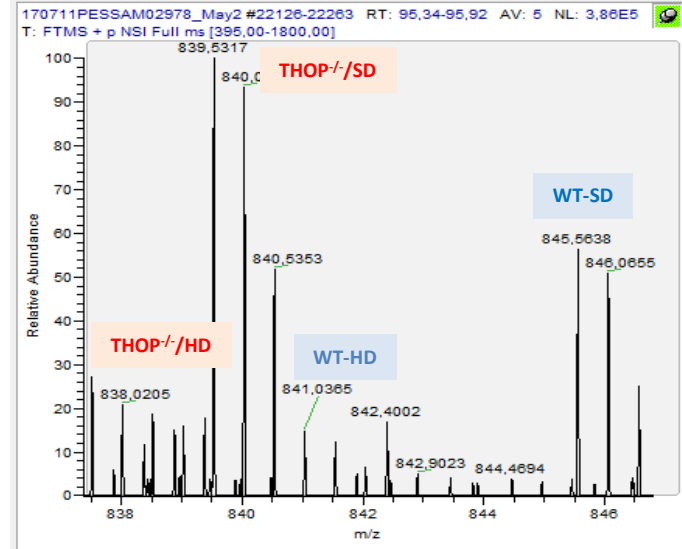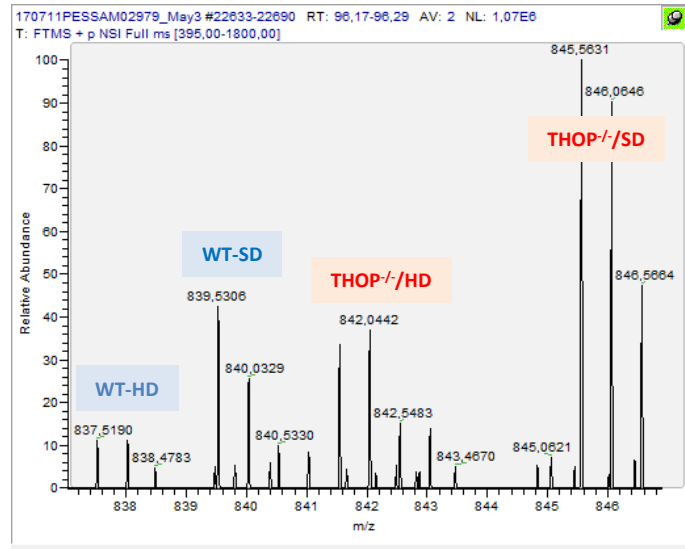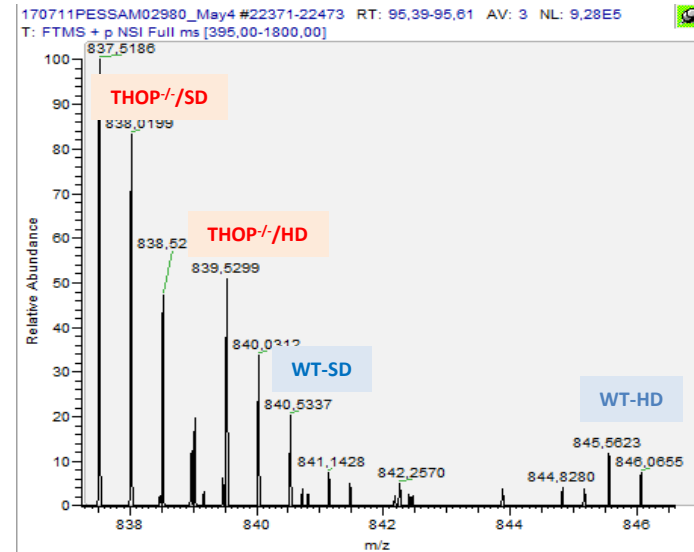

# AQGGVLPNIQAVLLPK

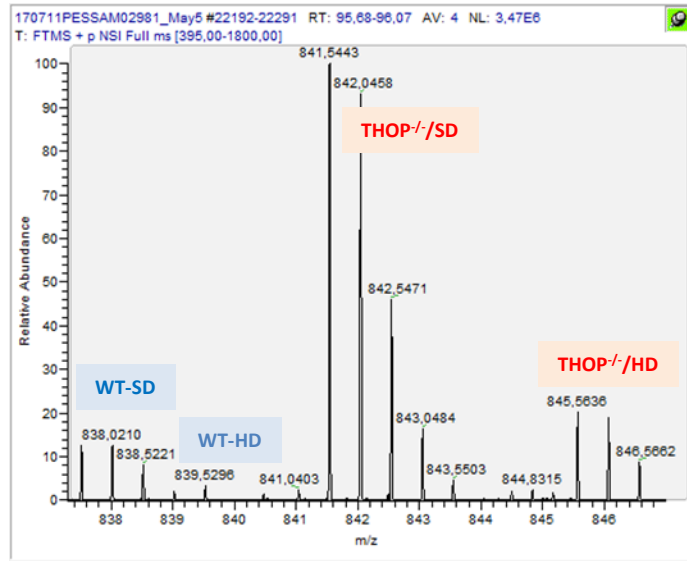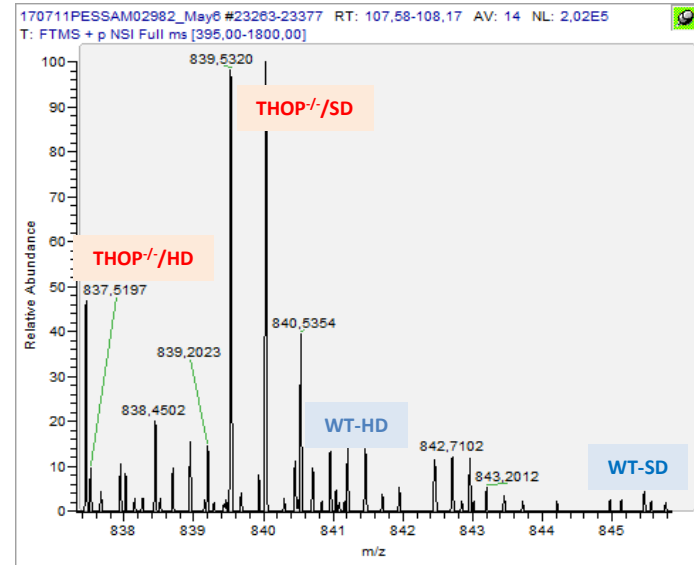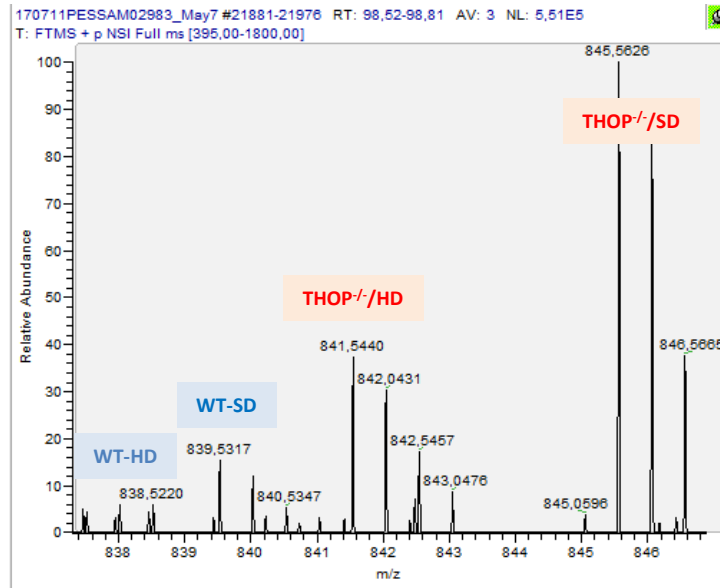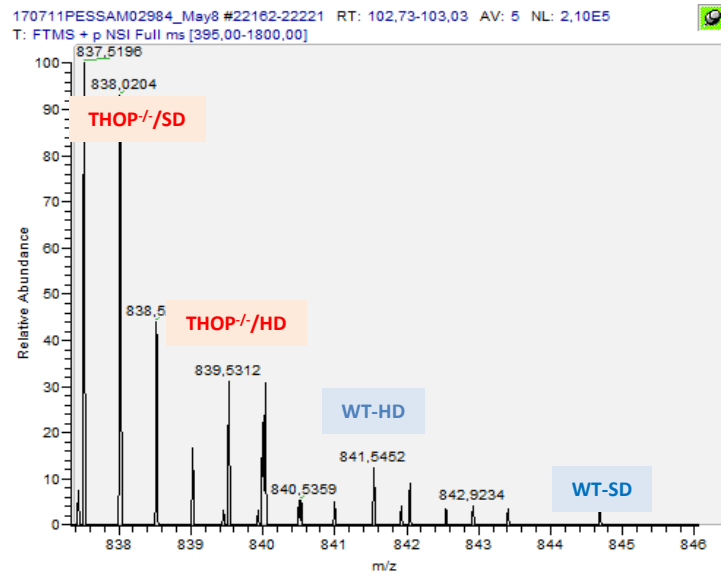

# AQGGVLPNIQAVLLPK

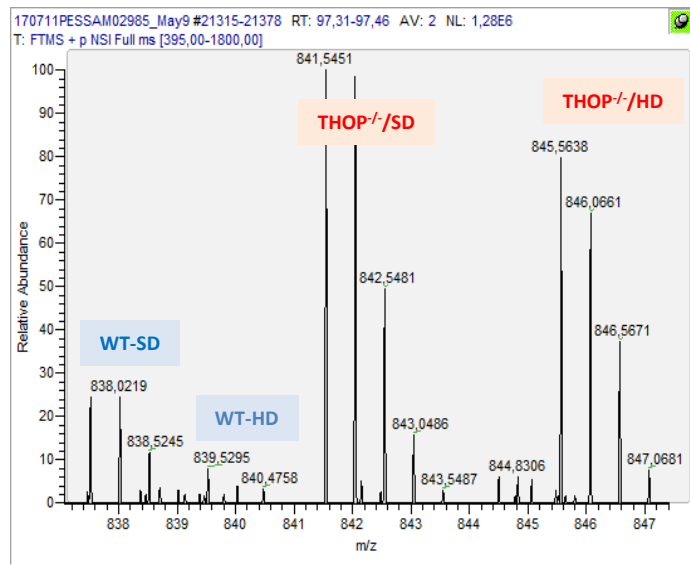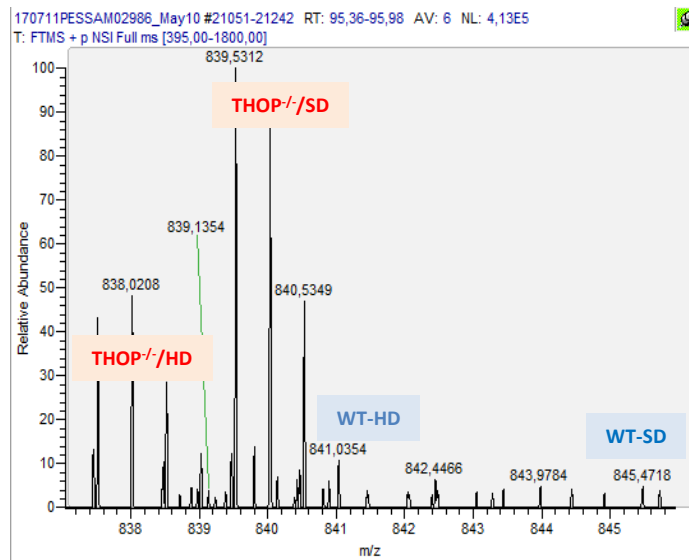



|    |           |           |           |           |           |           |   |          |          |          |          |          |          |   |
|----|-----------|-----------|-----------|-----------|-----------|-----------|---|----------|----------|----------|----------|----------|----------|---|
| 15 | 1646.0061 | 823.5067  | 1628.9796 | 814.9934  | 1627.9956 | 814.5014  | G | 537.2337 | 269.1205 | 520.2072 | 260.6072 | 519.2232 | 260.1152 | 5 |
| 16 | 1759.0902 | 880.0487  | 1742.0637 | 871.5355  | 1741.0796 | 871.0435  | I | 480.2123 | 240.6098 | 463.1857 | 232.0965 | 462.2017 | 231.6045 | 4 |
| 17 | 1906.1256 | 953.5664  | 1889.0991 | 945.0532  | 1888.1150 | 944.5612  | M | 367.1282 | 184.0677 | 350.1016 | 175.5545 | 349.1176 | 175.0625 | 3 |
| 18 | 2020.1685 | 1010.5879 | 2003.1420 | 1002.0746 | 2002.1580 | 1001.5826 | N | 220.0928 | 110.5500 | 203.0662 | 102.0368 | 202.0822 | 101.5448 | 2 |
| 19 |           |           |           |           |           |           | S | 106.0499 | 53.5286  |          |          | 88.0393  | 44.5233  | 1 |

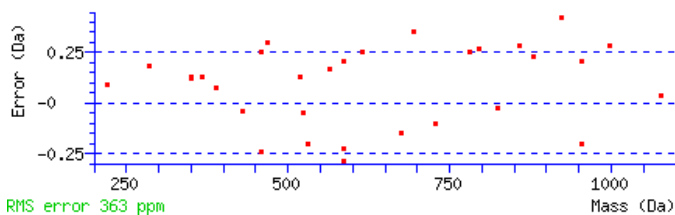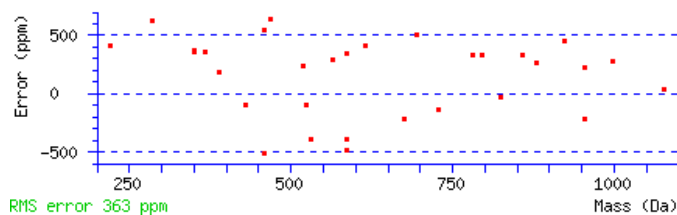

NCBI BLAST search of [KQVHPDTGISSKAMGIMNS](#)

(Parameters: blastp, nr protein database, expect=20000, no filter, PAM30)

Other BLAST [web gateways](#)

#### All matches to this query

| Score | Mr(calc)  | Delta  | Sequence                              |
|-------|-----------|--------|---------------------------------------|
| 33.4  | 2124.2039 | 0.0013 | <a href="#">KQVHPDTGISSKAMGIMNS</a>   |
| 23.1  | 2123.9537 | 0.2514 | <a href="#">TGLETIGRDTCPGEMGAEMI</a>  |
| 22.1  | 2124.0193 | 0.1858 | <a href="#">TLTDEDESPEGSRGGLEFSN</a>  |
| 21.4  | 2123.9948 | 0.2103 | <a href="#">FMLGTIPFPEGMGGSVYFS</a>   |
| 21.0  | 2124.1352 | 0.0700 | <a href="#">APVVNESGAILGMVTLGNMLS</a> |
| 20.8  | 2124.0752 | 0.1299 | <a href="#">YFHRDRLNTGSKDLFAE</a>     |
| 20.7  | 2124.0751 | 0.1300 | <a href="#">YNIVLFLTTFQESLGMSN</a>    |
| 20.6  | 2124.1430 | 0.0621 | <a href="#">LSSLGQIDGWSSMQLRAVV</a>   |
| 19.8  | 2124.0918 | 0.1133 | <a href="#">RERMDDSSYTSKLLSCK</a>     |
| 19.4  | 2123.9892 | 0.2159 | <a href="#">SVSLLSALATSDPGQMDSSQS</a> |

Mascot: <http://www.matrixscience.com/>

# KQVHPDTGISSKAMGI<sub>m</sub>NS

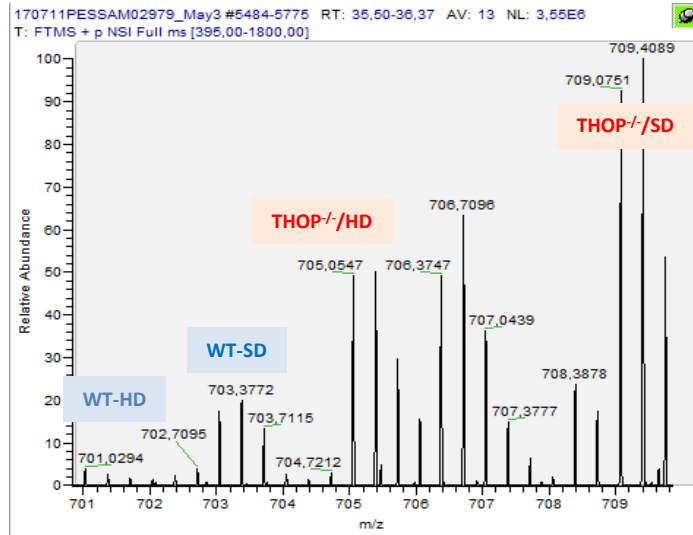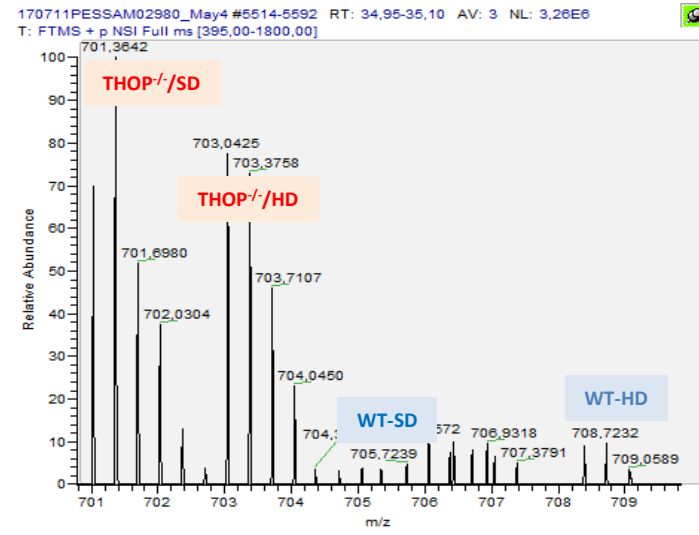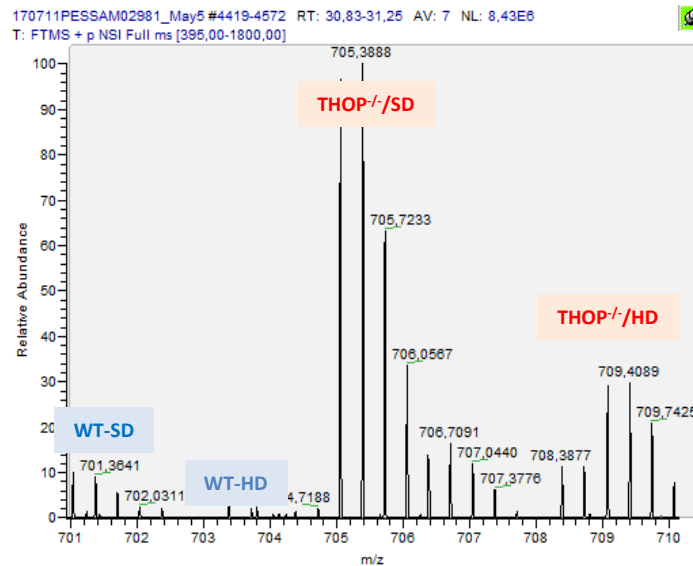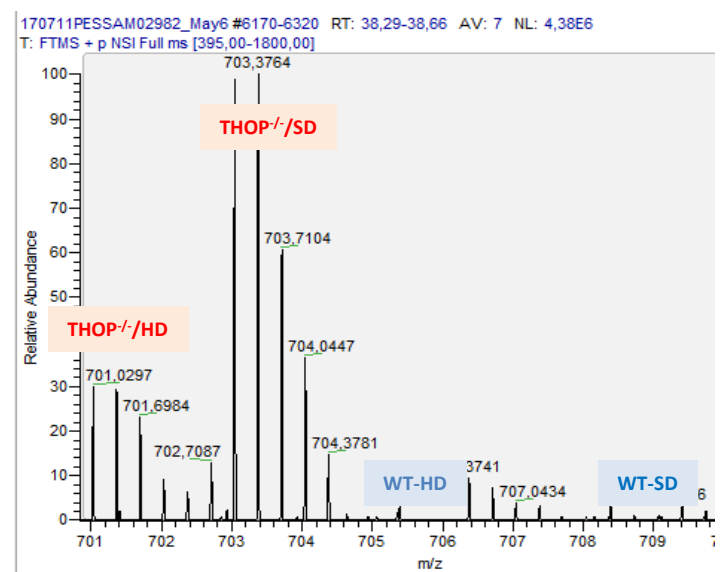

# KQVHPDTGISSKAMGImNS

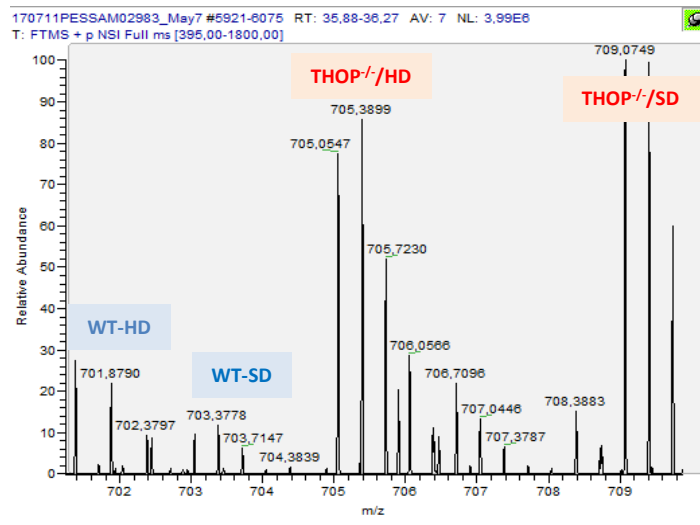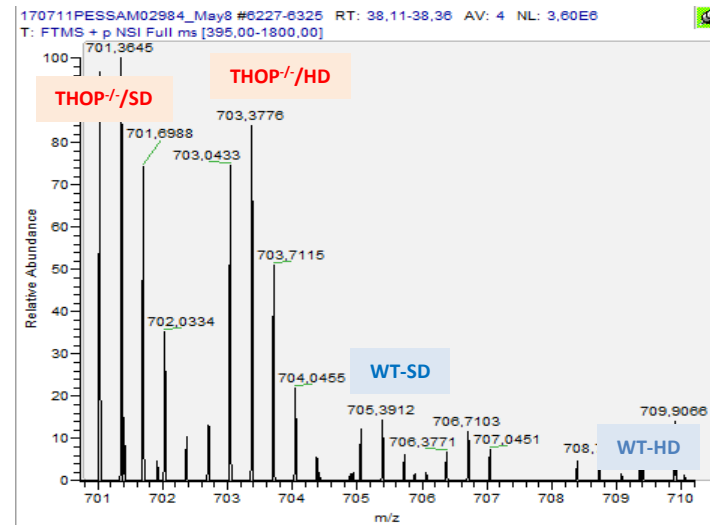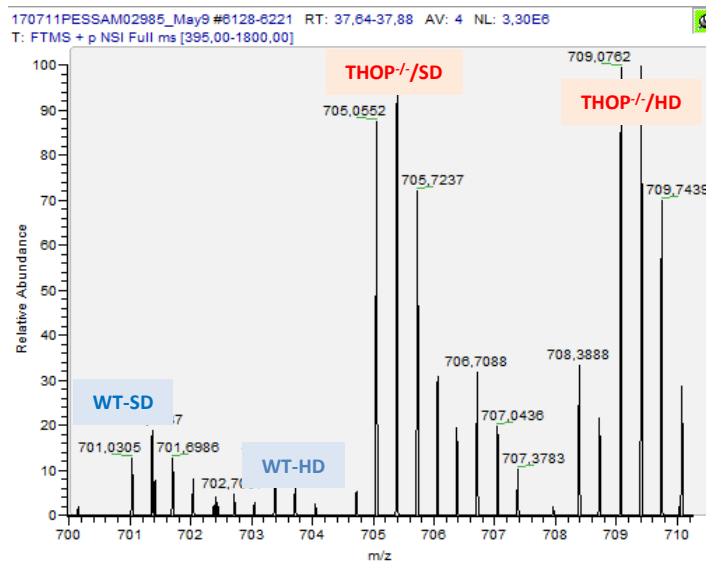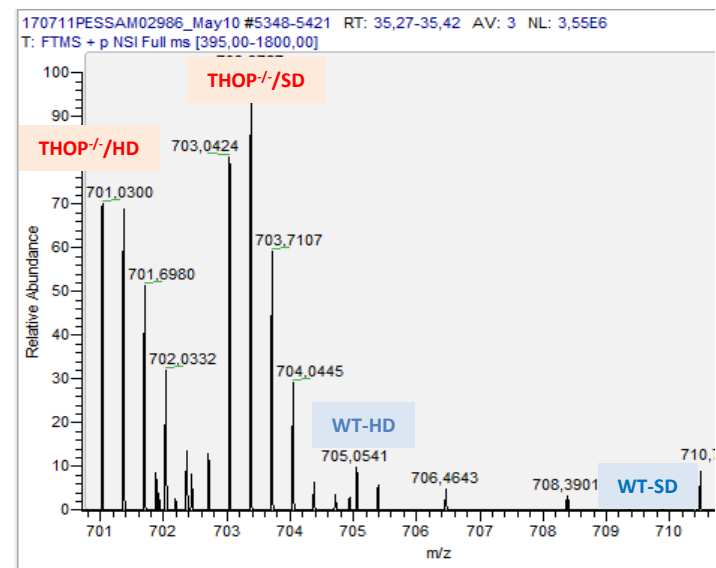

# Mascot Search Results

## Peptide View

MS/MS Fragmentation of **ASVLTAQPR**LMPEI

Found in **EF2\_MOUSE** in **SwissProt**, Elongation factor 2 OS=Mus musculus GN=Eef2 PE=1 SV=2

Match to Query 10834: 1560.910508 from(781.462530,2+) intensity(2986679.8000) scans(18798) rawscans(sn18798)  
rtinseconds(4807.0934) index(12263)

Title: 12264: Scan 18798 (rt=4807.09) [D:\Users\Mayara - HMS Fusion data\170711PESSAM02977\_May1.raw]

Data file 170711PESSAM02977\_May1.temp.mgf

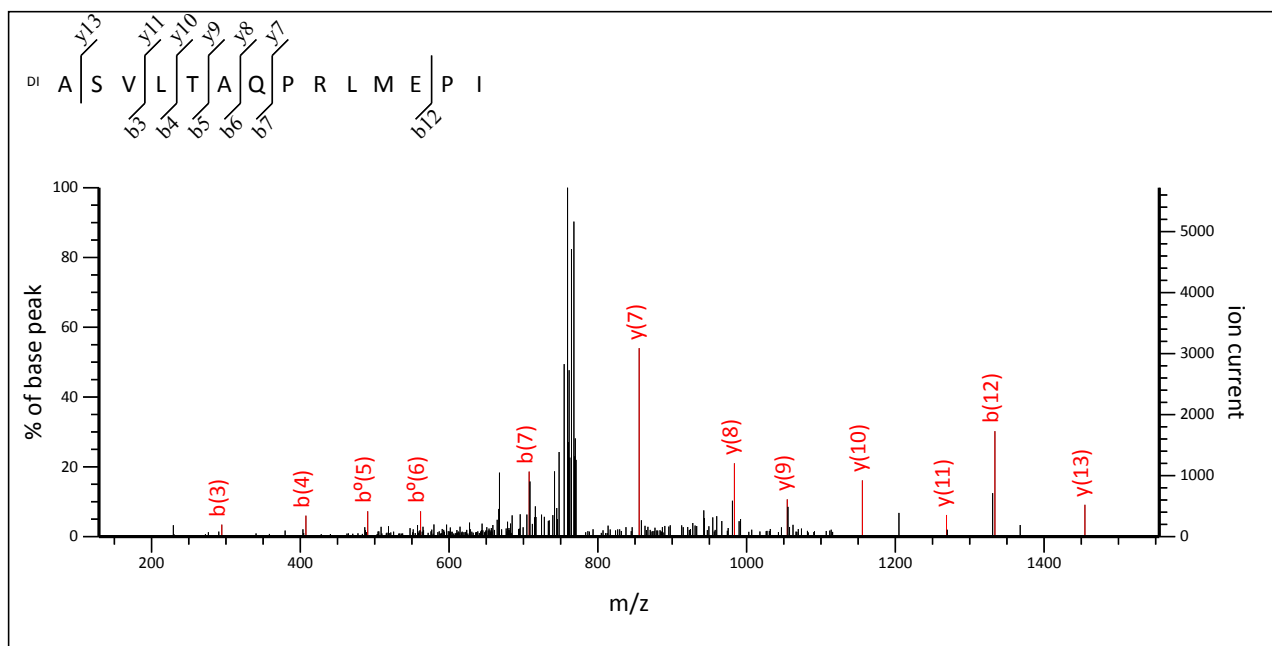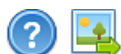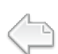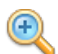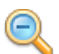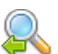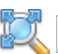

129.28

to

1554.87

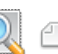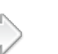

Label all possible matches ☐ Label matches used for scoring ☒

Monoisotopic mass of neutral peptide Mr(calc): 1560.9090

Variable modifications:

N-term : Dimethyl:2H(6)13C(2) (N-term)

Ions Score: 48 Expect: 0.022

Matches : 13/128 fragment ions using 13 most intense peaks ([help](#))

| #  | b         | b <sup>++</sup> | b <sup>*</sup> | b <sup>+++</sup> | b <sup>0</sup> | b <sup>0++</sup> | Seq. | y         | y <sup>++</sup> | y <sup>*</sup> | y <sup>+++</sup> | y <sup>0</sup> | y <sup>0++</sup> | #  |
|----|-----------|-----------------|----------------|------------------|----------------|------------------|------|-----------|-----------------|----------------|------------------|----------------|------------------|----|
| 1  | 108.1201  | 54.5637         |                |                  |                |                  | A    |           |                 |                |                  |                |                  | 14 |
| 2  | 195.1521  | 98.0797         |                |                  | 177.1415       | 89.0744          | S    | 1454.8036 | 727.9054        | 1437.7770      | 719.3921         | 1436.7930      | 718.9001         | 13 |
| 3  | 294.2205  | 147.6139        |                |                  | 276.2099       | 138.6086         | V    | 1367.7715 | 684.3894        | 1350.7450      | 675.8761         | 1349.7610      | 675.3841         | 12 |
| 4  | 407.3046  | 204.1559        |                |                  | 389.2940       | 195.1506         | L    | 1268.7031 | 634.8552        | 1251.6766      | 626.3419         | 1250.6926      | 625.8499         | 11 |
| 5  | 508.3522  | 254.6798        |                |                  | 490.3417       | 245.6745         | T    | 1155.6191 | 578.3132        | 1138.5925      | 569.7999         | 1137.6085      | 569.3079         | 10 |
| 6  | 579.3894  | 290.1983        |                |                  | 561.3788       | 281.1930         | A    | 1054.5714 | 527.7893        | 1037.5448      | 519.2761         | 1036.5608      | 518.7840         | 9  |
| 7  | 707.4479  | 354.2276        | 690.4214       | 345.7143         | 689.4374       | 345.2223         | Q    | 983.5343  | 492.2708        | 966.5077       | 483.7575         | 965.5237       | 483.2655         | 8  |
| 8  | 804.5007  | 402.7540        | 787.4742       | 394.2407         | 786.4901       | 393.7487         | P    | 855.4757  | 428.2415        | 838.4491       | 419.7282         | 837.4651       | 419.2362         | 7  |
| 9  | 960.6018  | 480.8045        | 943.5753       | 472.2913         | 942.5912       | 471.7993         | R    | 758.4229  | 379.7151        | 741.3964       | 371.2018         | 740.4124       | 370.7098         | 6  |
| 10 | 1073.6859 | 537.3466        | 1056.6593      | 528.8333         | 1055.6753      | 528.3413         | L    | 602.3218  | 301.6645        |                |                  | 584.3112       | 292.6593         | 5  |
| 11 | 1204.7264 | 602.8668        | 1187.6998      | 594.3535         | 1186.7158      | 593.8615         | M    | 489.2377  | 245.1225        |                |                  | 471.2272       | 236.1172         | 4  |
| 12 | 1333.7690 | 667.3881        | 1316.7424      | 658.8748         | 1315.7584      | 658.3828         | E    | 358.1973  | 179.6023        |                |                  | 340.1867       | 170.5970         | 3  |
| 13 | 1430.8217 | 715.9145        | 1413.7952      | 707.4012         | 1412.8112      | 706.9092         | P    | 229.1547  | 115.0810        |                |                  |                |                  | 2  |
| 14 |           |                 |                |                  |                |                  | I    | 132.1019  | 66.5546         |                |                  |                |                  | 1  |

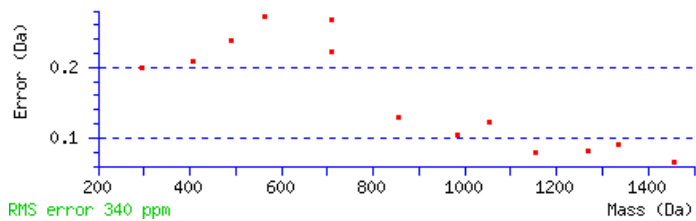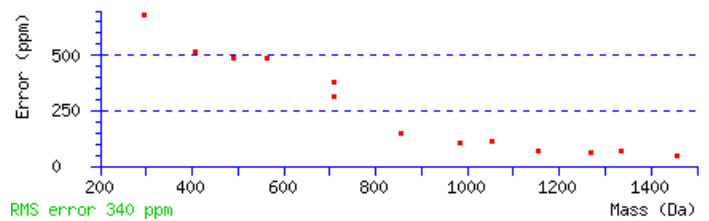

NCBI **BLAST** search of [ASVLTAQPRLMEPI](#)

(Parameters: blastp, nr protein database, expect=20000, no filter, PAM30)

Other BLAST [web gateways](#)

#### All matches to this query

| Score | Mr(calc)  | Delta   | Sequence                        |
|-------|-----------|---------|---------------------------------|
| 48.5  | 1560.9090 | 0.0015  | <a href="#">ASVLTAQPRLMEPI</a>  |
| 29.5  | 1560.8850 | 0.0255  | <a href="#">FLRFCKQATLQE</a>    |
| 28.0  | 1560.9007 | 0.0098  | <a href="#">AEGLTCLIKVGAEAD</a> |
| 26.9  | 1560.7915 | 0.1190  | <a href="#">GEALTAEKEHMEE</a>   |
| 22.4  | 1560.9279 | -0.0174 | <a href="#">KLPIYALAQTLGAF</a>  |
| 20.6  | 1560.8868 | 0.0237  | <a href="#">QELTSKQGGRCSVP</a>  |
| 19.3  | 1560.8624 | 0.0482  | <a href="#">RLRLNEEATLQE</a>    |
| 18.9  | 1560.7781 | 0.1324  | <a href="#">QELTAMRMSRDTA</a>   |
| 18.9  | 1560.7781 | 0.1324  | <a href="#">QELTAMRMSRDTA</a>   |
| 17.6  | 1560.8483 | 0.0622  | <a href="#">DRDALVGLAVLLGCD</a> |

Mascot: <http://www.matrixscience.com/>

# ASVLTAQPRLMEPI

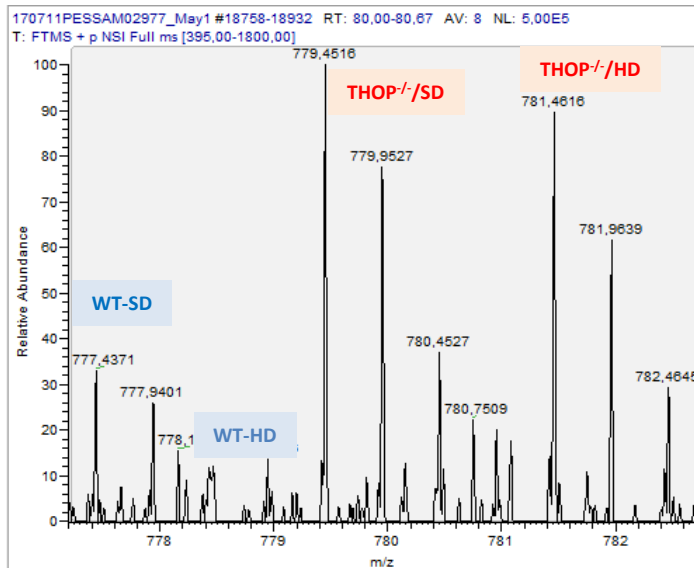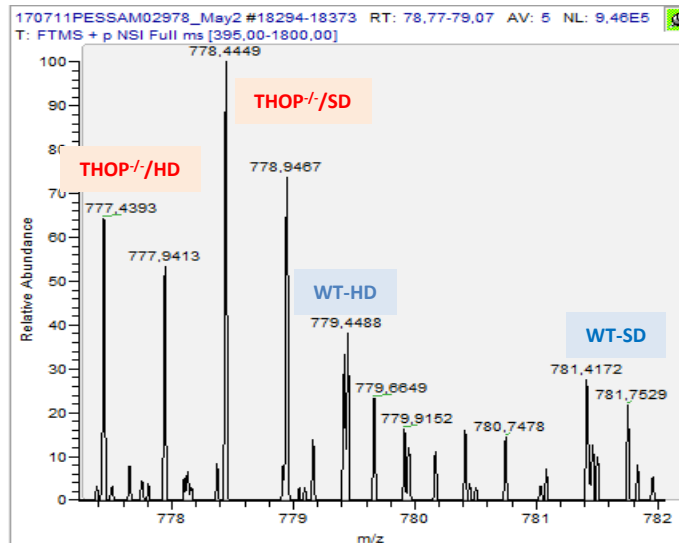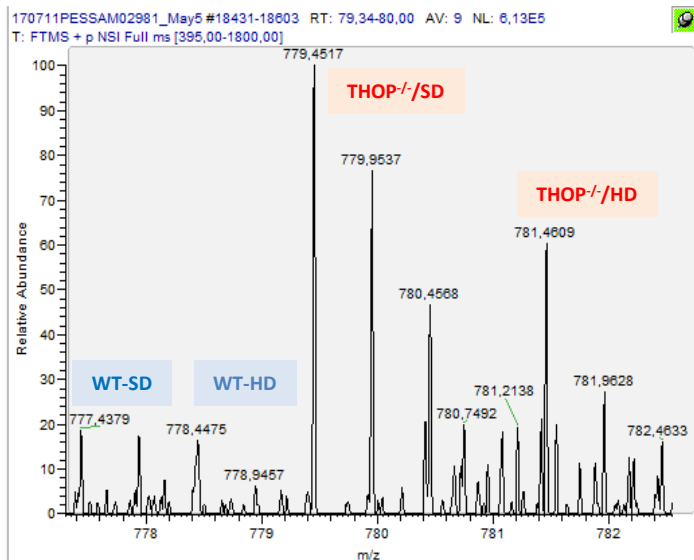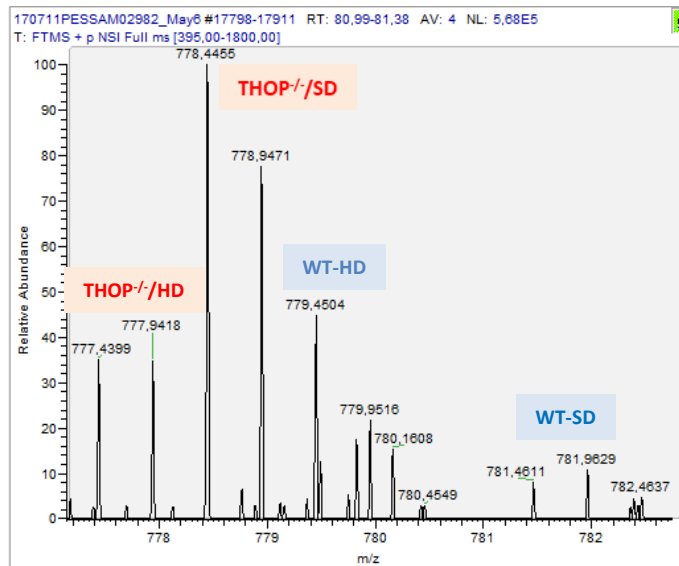

# ASVLTAQPRLMEPI

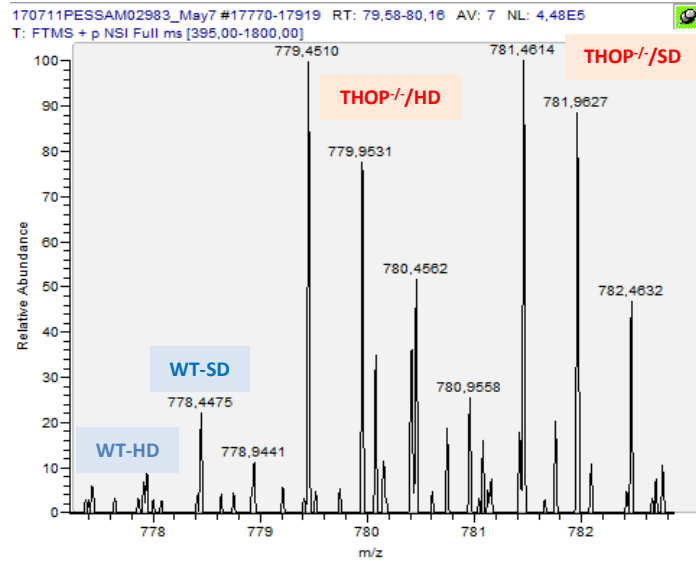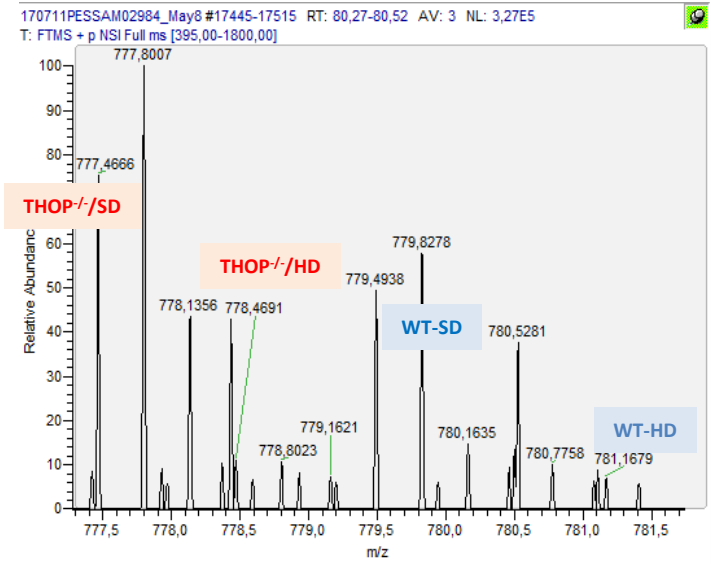

# Mascot Search Results

## Peptide View

MS/MS Fragmentation of **DISNADRLGSVEEQ**

Found in **KCRM\_MOUSE** in **SwissProt**, Creatine kinase M-type OS=Mus musculus GN=Ckm PE=1 SV=1

Match to Query 12401: 1650.795028 from(826.404790,2+) intensity(1203988.6000) scans(9733) rawscans(sn9733) rtinseconds(2944.0576) index(6186)

Title: 6187: Scan 9733 (rt=2944.06) [D:\Users\Mayara - HMS Fusion data\170711PESSAM02979\_May3.raw]

Data file 170711PESSAM02979\_May3.temp.mgf

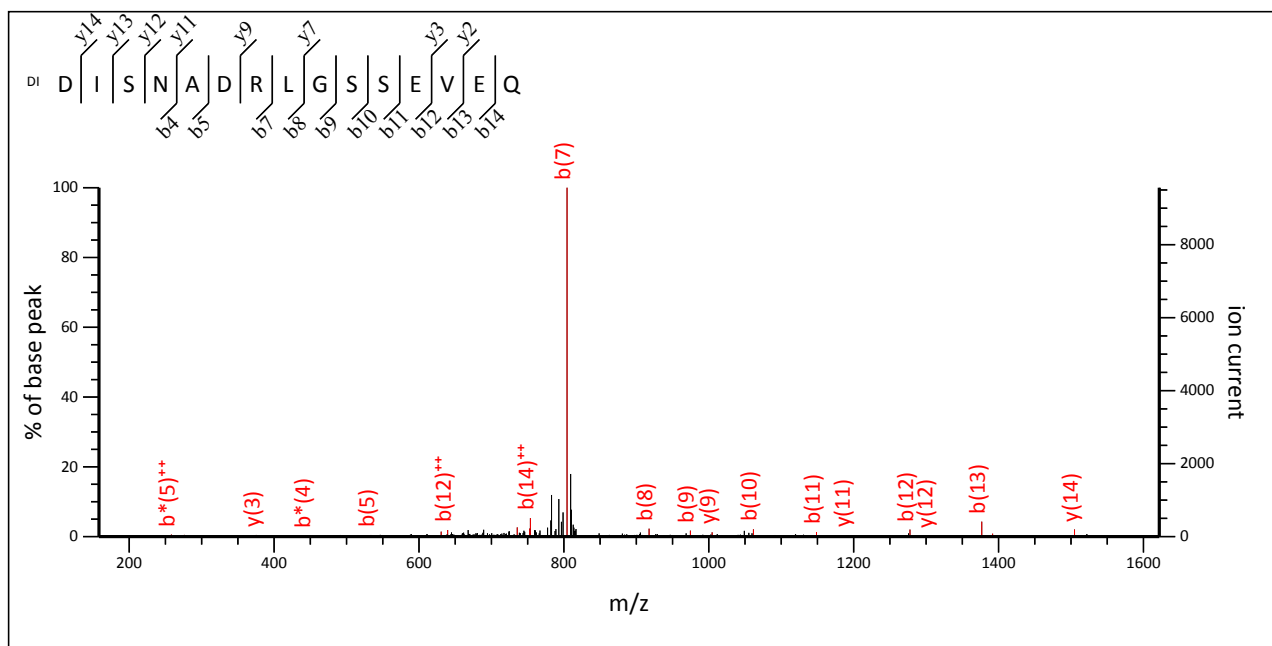

158.26

to

1621.86



Label all possible matches ☐ Label matches used for scoring ☒

Monoisotopic mass of neutral peptide Mr(calc): 1650.7999

Variable modifications:

N-term : Dimethyl:2H(4) (N-term)

Ions Score: 75 Expect: 8.1e-005

Matches : 28/160 fragment ions using 37 most intense peaks ([help](#))

| #  | b         | b <sup>++</sup> | b <sup>*</sup> | b <sup>+++</sup> | b <sup>0</sup> | b <sup>0++</sup> | Seq. | y         | y <sup>++</sup> | y <sup>*</sup> | y <sup>+++</sup> | y <sup>0</sup> | y <sup>0++</sup> | #  |
|----|-----------|-----------------|----------------|------------------|----------------|------------------|------|-----------|-----------------|----------------|------------------|----------------|------------------|----|
| 1  | 148.0906  | 74.5490         |                |                  | 130.0801       | 65.5437          | D    |           |                 |                |                  |                |                  | 15 |
| 2  | 261.1747  | 131.0910        |                |                  | 243.1641       | 122.0857         | I    | 1504.7238 | 752.8655        | 1487.6972      | 744.3523         | 1486.7132      | 743.8603         | 14 |
| 3  | 348.2067  | 174.6070        |                |                  | 330.1962       | 165.6017         | S    | 1391.6397 | 696.3235        | 1374.6132      | 687.8102         | 1373.6292      | 687.3182         | 13 |
| 4  | 462.2496  | 231.6285        | 445.2231       | 223.1152         | 444.2391       | 222.6232         | N    | 1304.6077 | 652.8075        | 1287.5811      | 644.2942         | 1286.5971      | 643.8022         | 12 |
| 5  | 533.2868  | 267.1470        | 516.2602       | 258.6337         | 515.2762       | 258.1417         | A    | 1190.5648 | 595.7860        | 1173.5382      | 587.2727         | 1172.5542      | 586.7807         | 11 |
| 6  | 648.3137  | 324.6605        | 631.2872       | 316.1472         | 630.3031       | 315.6552         | D    | 1119.5277 | 560.2675        | 1102.5011      | 551.7542         | 1101.5171      | 551.2622         | 10 |
| 7  | 804.4148  | 402.7110        | 787.3883       | 394.1978         | 786.4042       | 393.7058         | R    | 1004.5007 | 502.7540        | 987.4742       | 494.2407         | 986.4901       | 493.7487         | 9  |
| 8  | 917.4989  | 459.2531        | 900.4723       | 450.7398         | 899.4883       | 450.2478         | L    | 848.3996  | 424.7034        | 831.3731       | 416.1902         | 830.3890       | 415.6982         | 8  |
| 9  | 974.5203  | 487.7638        | 957.4938       | 479.2505         | 956.5098       | 478.7585         | G    | 735.3155  | 368.1614        | 718.2890       | 359.6481         | 717.3050       | 359.1561         | 7  |
| 10 | 1061.5524 | 531.2798        | 1044.5258      | 522.7665         | 1043.5418      | 522.2745         | S    | 678.2941  | 339.6507        | 661.2675       | 331.1374         | 660.2835       | 330.6454         | 6  |
| 11 | 1148.5844 | 574.7958        | 1131.5578      | 566.2826         | 1130.5738      | 565.7906         | S    | 591.2620  | 296.1347        | 574.2355       | 287.6214         | 573.2515       | 287.1294         | 5  |
| 12 | 1277.6270 | 639.3171        | 1260.6004      | 630.8039         | 1259.6164      | 630.3119         | E    | 504.2300  | 252.6186        | 487.2035       | 244.1054         | 486.2195       | 243.6134         | 4  |
| 13 | 1376.6954 | 688.8513        | 1359.6689      | 680.3381         | 1358.6848      | 679.8461         | V    | 375.1874  | 188.0974        | 358.1609       | 179.5841         | 357.1769       | 179.0921         | 3  |
| 14 | 1505.7380 | 753.3726        | 1488.7114      | 744.8594         | 1487.7274      | 744.3674         | E    | 276.1190  | 138.5631        | 259.0925       | 130.0499         | 258.1084       | 129.5579         | 2  |

|    |  |  |  |  |  |   |          |         |          |         |  |  |   |
|----|--|--|--|--|--|---|----------|---------|----------|---------|--|--|---|
| 15 |  |  |  |  |  | Q | 147.0764 | 74.0418 | 130.0499 | 65.5286 |  |  | 1 |
|----|--|--|--|--|--|---|----------|---------|----------|---------|--|--|---|

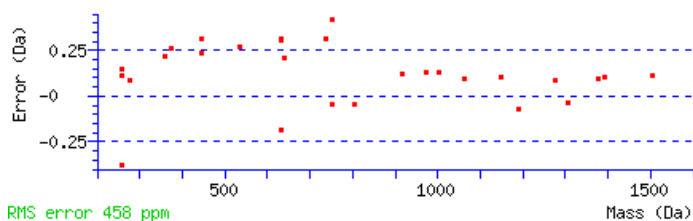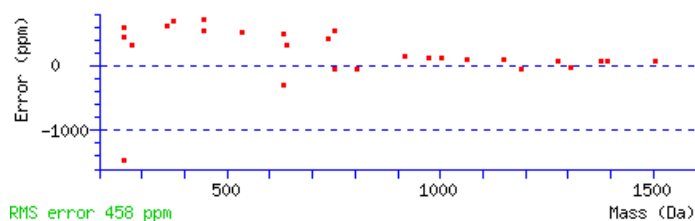

NCBI **BLAST** search of [DISNADRLGSSEVEQ](#)

(Parameters: blastp, nr protein database, expect=20000, no filter, PAM30)

Other BLAST [web gateways](#)

#### All matches to this query

| Score | Mr(calc)  | Delta   | Sequence                          |
|-------|-----------|---------|-----------------------------------|
| 75.0  | 1650.7999 | -0.0048 | <a href="#">DISNADRLGSSEVEQ</a>   |
| 30.3  | 1650.9810 | -0.1860 | <a href="#">RLSNVSLTGLGTVRT</a>   |
| 25.1  | 1650.7634 | 0.0316  | <a href="#">RSVEEAVNGSEEEENA</a>  |
| 24.1  | 1651.0120 | -0.2170 | <a href="#">VSGTTLRGLIKLNDT</a>   |
| 23.7  | 1650.8875 | -0.0925 | <a href="#">ARVTWCAVGSEEKR</a>    |
| 22.9  | 1650.7828 | 0.0123  | <a href="#">DQVSAYGFITNNYQ</a>    |
| 22.4  | 1650.7407 | 0.0544  | <a href="#">SEQEVNELCQSVQE</a>    |
| 21.9  | 1650.9506 | -0.1556 | <a href="#">EVLCSVSLKLWQE</a>     |
| 21.8  | 1650.7948 | 0.0002  | <a href="#">TSSASSVTGVVNGESLE</a> |
| 21.6  | 1650.8626 | -0.0676 | <a href="#">DQVSEDTVEMPLPK</a>    |

Mascot: <http://www.matrixscience.com/>

# DISNADRLGSSEVEQ

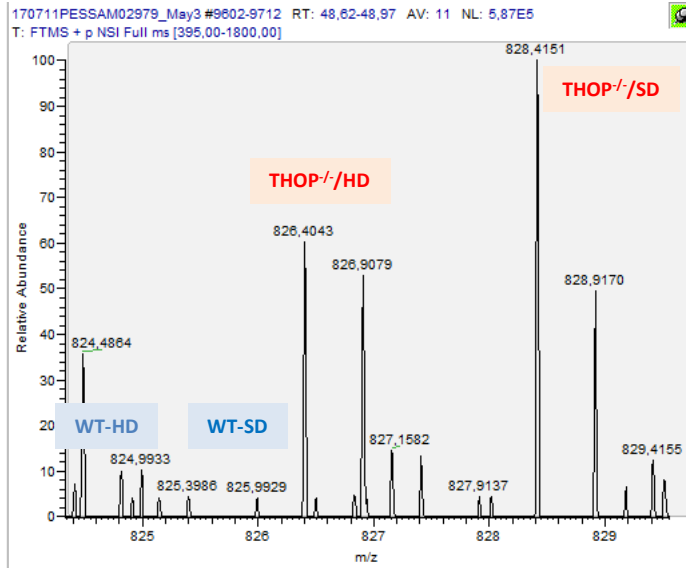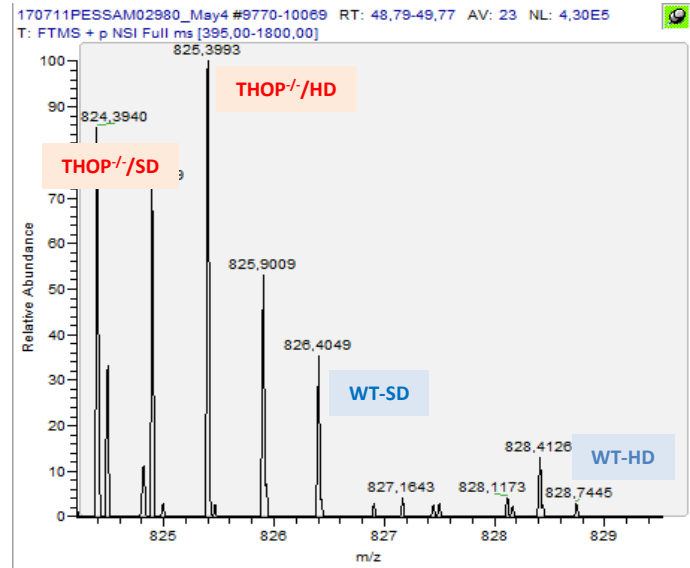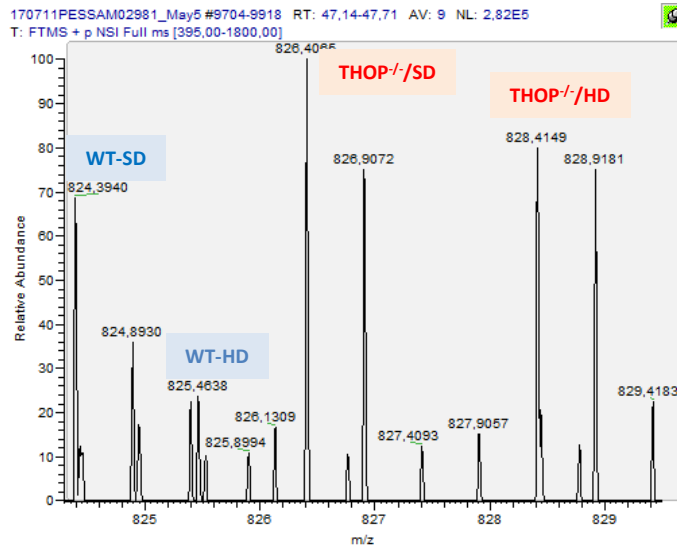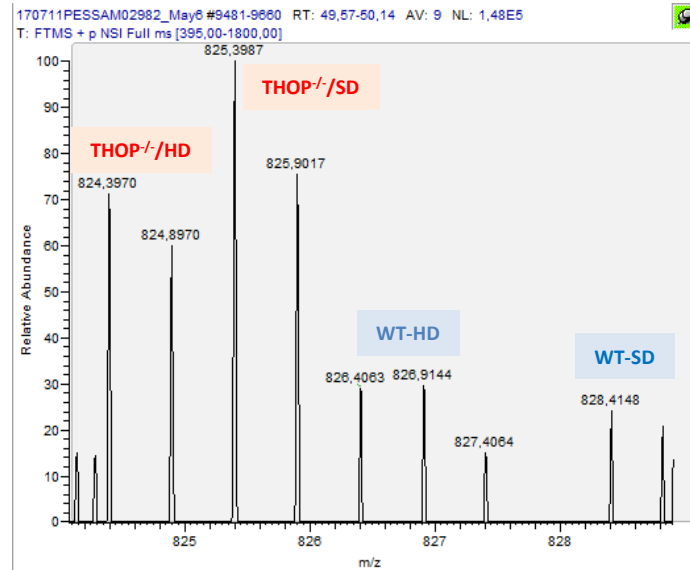

# DISNADRLGSSEVEQ

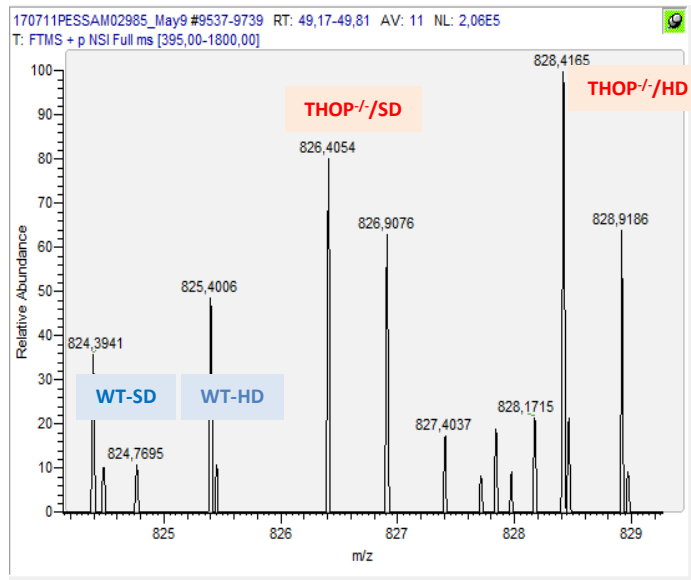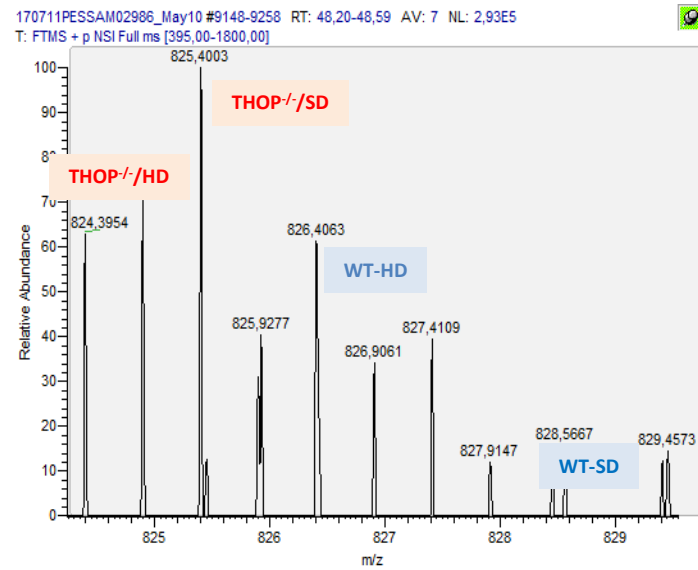

# Mascot Search Results

## Peptide View

MS/MS Fragmentation of **DISNADRLGSSEVEQV**

Found in **KCRM\_MOUSE** in **SwissProt**, Creatine kinase M-type OS=Mus musculus GN=Ckm PE=1 SV=1

Match to Query 13809: 1753.890468 from(877.952510,2+) intensity(1823285.3000) scans(13413) rawscans(sn13413)  
rtinseconds(3585.2932) index(8910)

Title: 8911: Scan 13413 (rt=3585.29) [D:\Users\Mayara - HMS Fusion data\170711PESSAM02981\_May5.raw]

Data file 170711PESSAM02981\_May5.temp.mgf

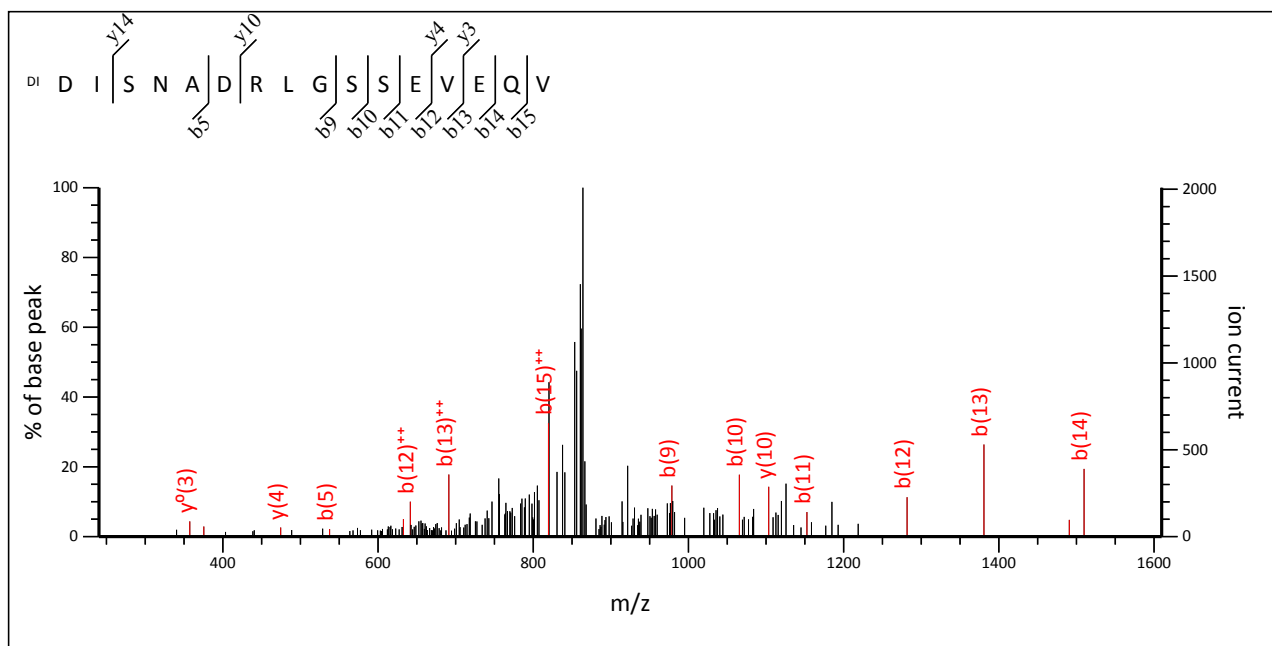

240.37

to

1609.83

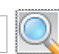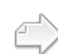

Label all possible matches ☐ Label matches used for scoring ☒

Monoisotopic mass of neutral peptide Mr(calc): 1753.8875

Variable modifications:

N-term : Dimethyl:2H(6)13C(2) (N-term)

Ions Score: 34 Expect: 0.46

Matches : 18/168 fragment ions using 31 most intense peaks ([help](#))

| #  | b         | b <sup>++</sup> | b <sup>*</sup> | b <sup>+++</sup> | b <sup>0</sup> | b <sup>0++</sup> | Seq. | y         | y <sup>++</sup> | y <sup>*</sup> | y <sup>+++</sup> | y <sup>0</sup> | y <sup>0++</sup> | #  |
|----|-----------|-----------------|----------------|------------------|----------------|------------------|------|-----------|-----------------|----------------|------------------|----------------|------------------|----|
| 1  | 152.1099  | 76.5586         |                |                  | 134.0993       | 67.5533          | D    |           |                 |                |                  |                |                  | 16 |
| 2  | 265.1940  | 133.1006        |                |                  | 247.1834       | 124.0953         | I    | 1603.7922 | 802.3997        | 1586.7657      | 793.8865         | 1585.7816      | 793.3945         | 15 |
| 3  | 352.2260  | 176.6166        |                |                  | 334.2154       | 167.6113         | S    | 1490.7081 | 745.8577        | 1473.6816      | 737.3444         | 1472.6976      | 736.8524         | 14 |
| 4  | 466.2689  | 233.6381        | 449.2424       | 225.1248         | 448.2583       | 224.6328         | N    | 1403.6761 | 702.3417        | 1386.6496      | 693.8284         | 1385.6655      | 693.3364         | 13 |
| 5  | 537.3060  | 269.1566        | 520.2795       | 260.6434         | 519.2955       | 260.1514         | A    | 1289.6332 | 645.3202        | 1272.6066      | 636.8070         | 1271.6226      | 636.3149         | 12 |
| 6  | 652.3330  | 326.6701        | 635.3064       | 318.1568         | 634.3224       | 317.6648         | D    | 1218.5961 | 609.8017        | 1201.5695      | 601.2884         | 1200.5855      | 600.7964         | 11 |
| 7  | 808.4341  | 404.7207        | 791.4075       | 396.2074         | 790.4235       | 395.7154         | R    | 1103.5691 | 552.2882        | 1086.5426      | 543.7749         | 1085.5586      | 543.2829         | 10 |
| 8  | 921.5181  | 461.2627        | 904.4916       | 452.7494         | 903.5076       | 452.2574         | L    | 947.4680  | 474.2376        | 930.4415       | 465.7244         | 929.4575       | 465.2324         | 9  |
| 9  | 978.5396  | 489.7734        | 961.5131       | 481.2602         | 960.5290       | 480.7682         | G    | 834.3840  | 417.6956        | 817.3574       | 409.1823         | 816.3734       | 408.6903         | 8  |
| 10 | 1065.5716 | 533.2895        | 1048.5451      | 524.7762         | 1047.5611      | 524.2842         | S    | 777.3625  | 389.1849        | 760.3359       | 380.6716         | 759.3519       | 380.1796         | 7  |
| 11 | 1152.6037 | 576.8055        | 1135.5771      | 568.2922         | 1134.5931      | 567.8002         | S    | 690.3305  | 345.6689        | 673.3039       | 337.1556         | 672.3199       | 336.6636         | 6  |
| 12 | 1281.6463 | 641.3268        | 1264.6197      | 632.8135         | 1263.6357      | 632.3215         | E    | 603.2984  | 302.1529        | 586.2719       | 293.6396         | 585.2879       | 293.1476         | 5  |
| 13 | 1380.7147 | 690.8610        | 1363.6881      | 682.3477         | 1362.7041      | 681.8557         | V    | 474.2558  | 237.6316        | 457.2293       | 229.1183         | 456.2453       | 228.6263         | 4  |
| 14 | 1509.7573 | 755.3823        | 1492.7307      | 746.8690         | 1491.7467      | 746.3770         | E    | 375.1874  | 188.0974        | 358.1609       | 179.5841         | 357.1769       | 179.0921         | 3  |

|    |           |          |           |          |           |          |   |          |          |          |          |  |  |   |
|----|-----------|----------|-----------|----------|-----------|----------|---|----------|----------|----------|----------|--|--|---|
| 15 | 1637.8158 | 819.4116 | 1620.7893 | 810.8983 | 1619.8053 | 810.4063 | Q | 246.1448 | 123.5761 | 229.1183 | 115.0628 |  |  | 2 |
| 16 |           |          |           |          |           |          | V | 118.0863 | 59.5468  |          |          |  |  | 1 |

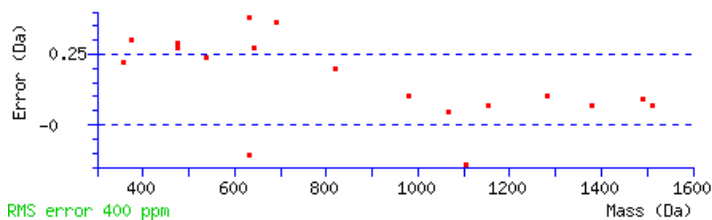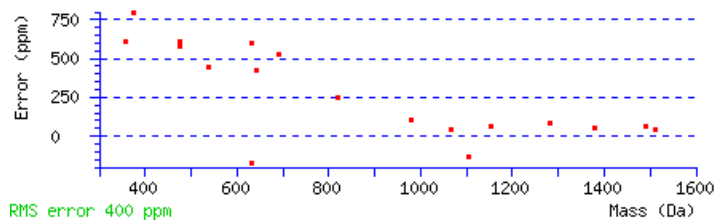

NCBI **BLAST** search of [DISNADRLGSSEVEQV](#)

(Parameters: blastp, nr protein database, expect=20000, no filter, PAM30)

Other BLAST [web gateways](#)

#### All matches to this query

| Score | Mr(calc)  | Delta   | Sequence                           |
|-------|-----------|---------|------------------------------------|
| 33.7  | 1753.8875 | 0.0029  | <a href="#">DISNADRLGSSEVEQV</a>   |
| 28.9  | 1753.8808 | 0.0097  | <a href="#">EDTFKKCSSEVEAK</a>     |
| 22.5  | 1754.0066 | -0.1161 | <a href="#">ILTEGQVKNSEVEQV</a>    |
| 21.3  | 1753.9308 | -0.0404 | <a href="#">KGGPGA AVEPSEGEEVQ</a> |
| 20.4  | 1753.9284 | -0.0379 | <a href="#">FRDEELKCTVVELN</a>     |
| 19.9  | 1754.0025 | -0.1121 | <a href="#">NVTAEKEVSTGTVLRS</a>   |
| 19.9  | 1753.7428 | 0.1477  | <a href="#">ENGSDISSAENEQTEA</a>   |
| 19.8  | 1753.9873 | -0.0968 | <a href="#">GPPGHKGEGKDMVISR</a>   |
| 19.5  | 1753.9826 | -0.0921 | <a href="#">GLLTTT VTLQQPVELN</a>  |
| 19.1  | 1753.9195 | -0.0291 | <a href="#">GNEVDGMSRPLRPRP</a>    |

Mascot: <http://www.matrixscience.com/>

# DISNADRLGSSEVEQV

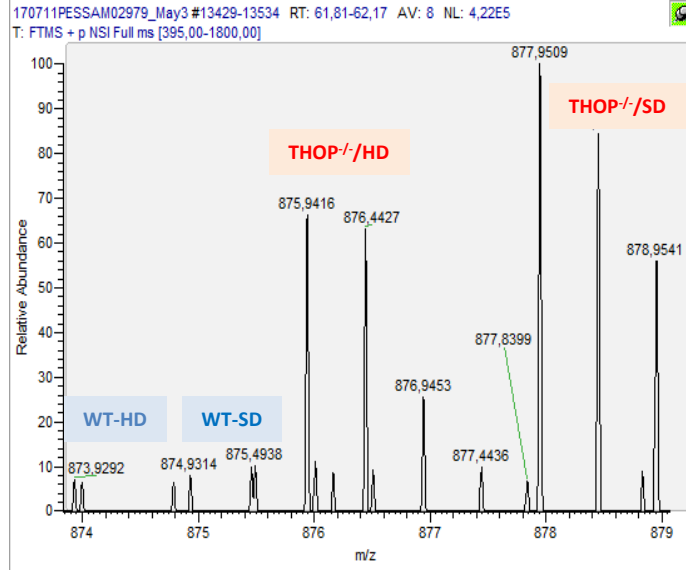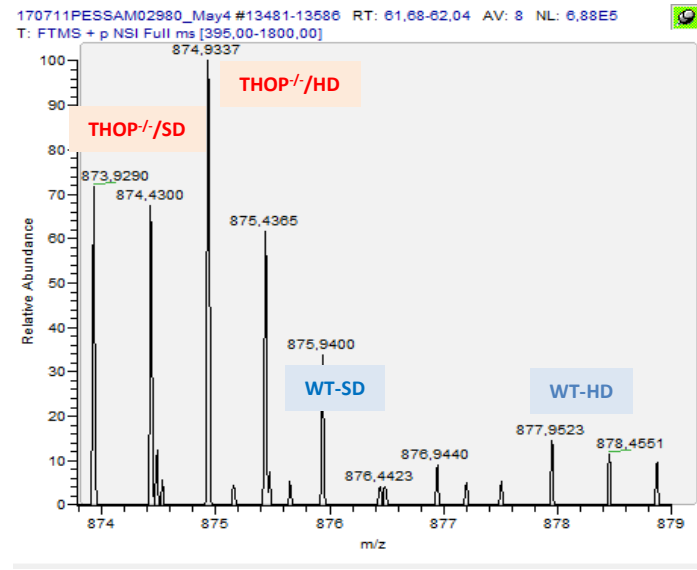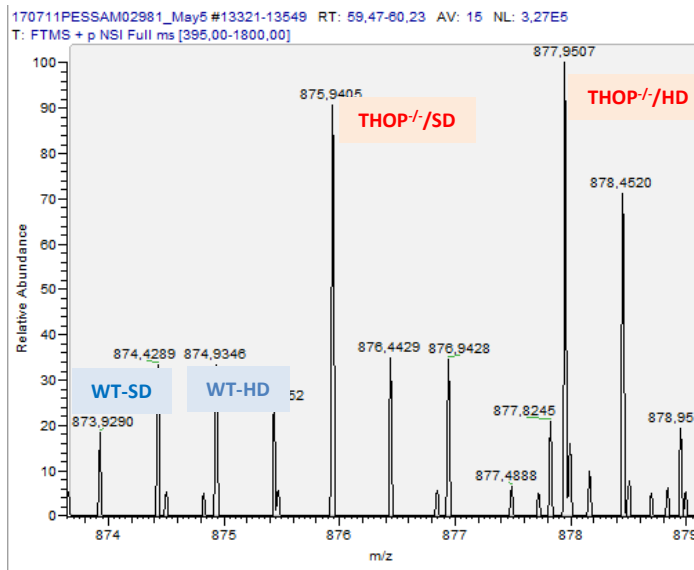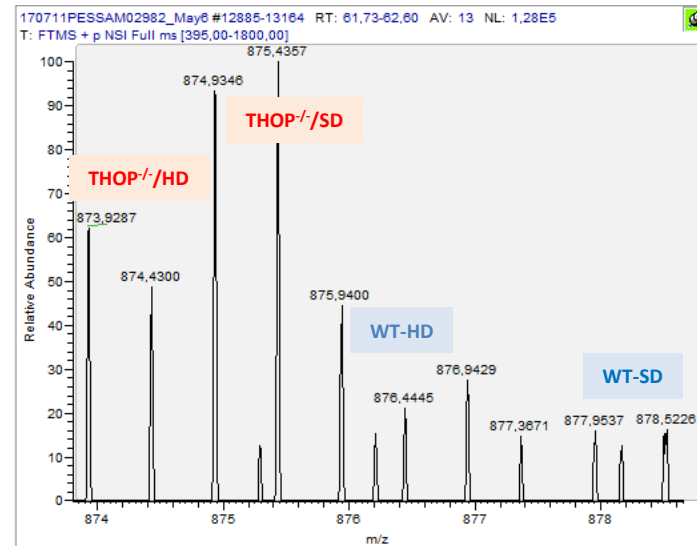

# DISNADRLGSSEVEQV

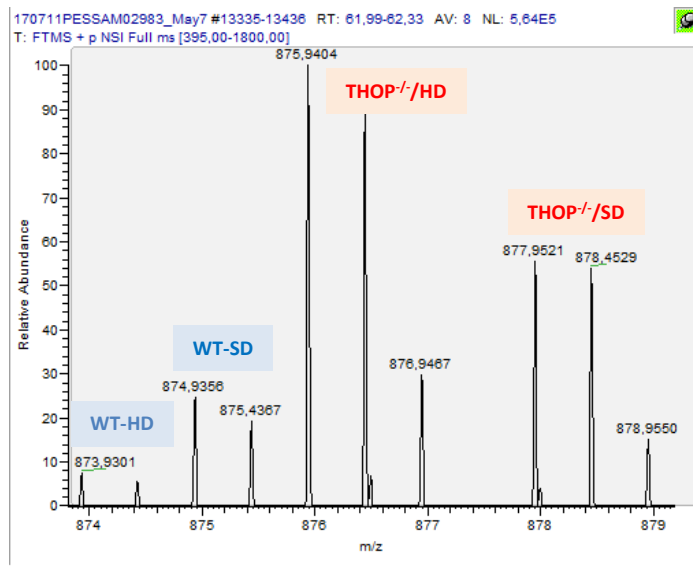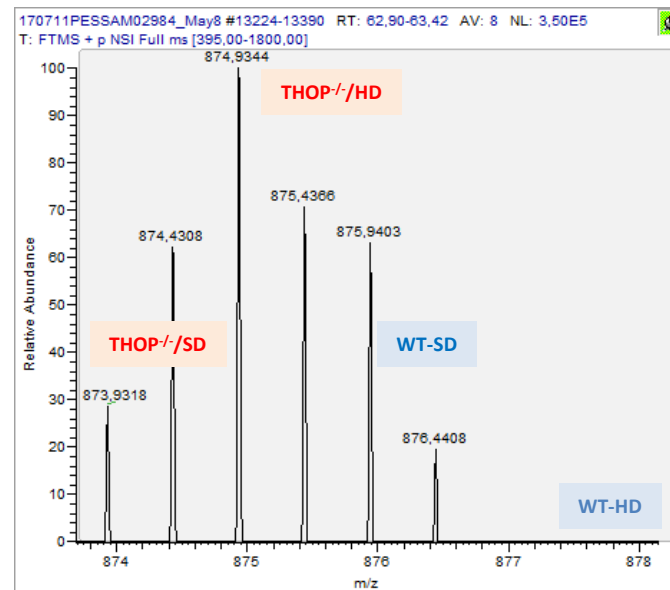

# Mascot Search Results

## Peptide View

MS/MS Fragmentation of **IDDHFLFDKPVSP**LL

Found in **KCRM\_MOUSE** in **SwissProt**, Creatine kinase M-type OS=Mus musculus GN=Ckm PE=1 SV=1

Match to Query 14384: 1827.078528 from(914.546540,2+) intensity(746218.2800) scans(23165-23196) rawscans(sn23165:sn23196) rtinseconds(5986.6983-5996.3487) index(15276)

Title: 15277: Sum of 2 scans in range 23165 (rt=5986.7) to 23196 (rt=5996.35) [D:\Users\Mayara - HMS Fusion data\170711PESSAM02977\_May1.raw]

Data file 170711PESSAM02977\_May1.temp.mgf

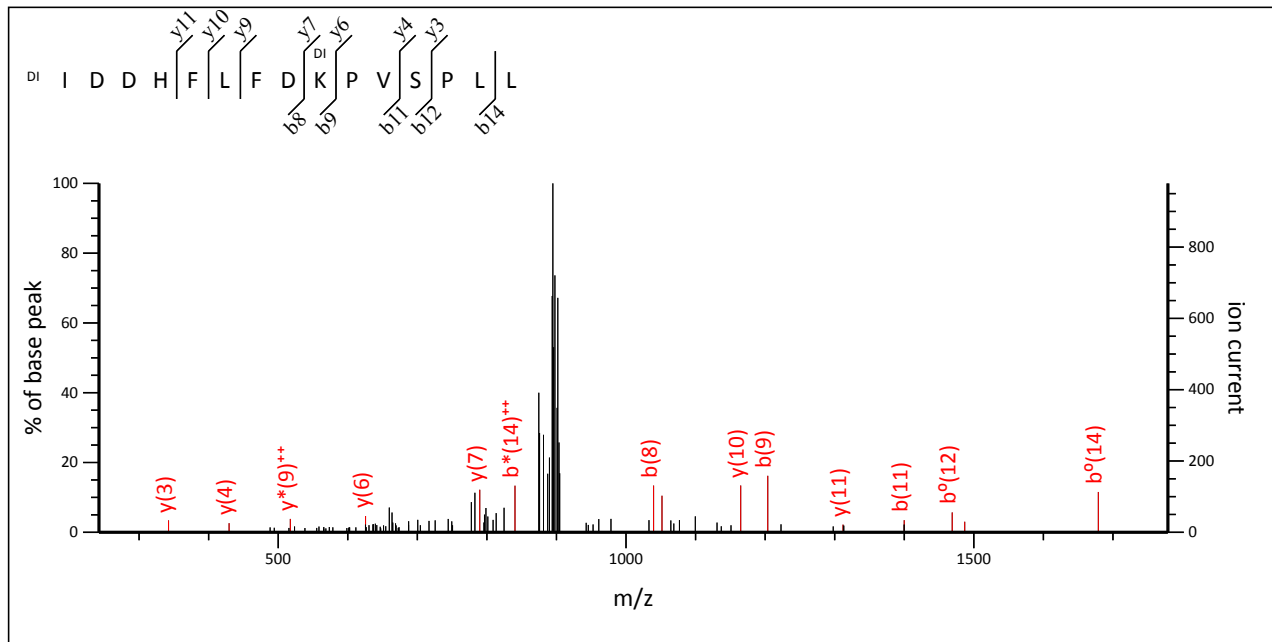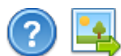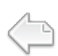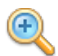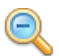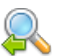

242.33

to 1779

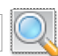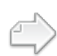

Label all possible matches ☐ Label matches used for scoring ☒

Monoisotopic mass of neutral peptide Mr(calc): 1827.0757

Variable modifications:

N-term : Dimethyl:2H(6)13C(2) (N-term)

K9 : Dimethyl:2H(6)13C(2) (K)

Ions Score: 46 Expect: 0.0018

Matches : 20/132 fragment ions using 25 most intense peaks ([help](#))

| #  | b         | b <sup>++</sup> | b <sup>*</sup> | b <sup>*++</sup> | b <sup>0</sup> | b <sup>0++</sup> | Seq. | y         | y <sup>++</sup> | y <sup>*</sup> | y <sup>*++</sup> | y <sup>0</sup> | y <sup>0++</sup> | #  |
|----|-----------|-----------------|----------------|------------------|----------------|------------------|------|-----------|-----------------|----------------|------------------|----------------|------------------|----|
| 1  | 150.1670  | 75.5871         |                |                  |                |                  | I    |           |                 |                |                  |                |                  | 15 |
| 2  | 265.1940  | 133.1006        |                |                  | 247.1834       | 124.0953         | D    | 1678.9232 | 839.9652        | 1661.8967      | 831.4520         | 1660.9126      | 830.9600         | 14 |
| 3  | 380.2209  | 190.6141        |                |                  | 362.2103       | 181.6088         | D    | 1563.8963 | 782.4518        | 1546.8697      | 773.9385         | 1545.8857      | 773.4465         | 13 |
| 4  | 517.2798  | 259.1435        |                |                  | 499.2692       | 250.1383         | H    | 1448.8693 | 724.9383        | 1431.8428      | 716.4250         | 1430.8588      | 715.9330         | 12 |
| 5  | 664.3482  | 332.6777        |                |                  | 646.3377       | 323.6725         | F    | 1311.8104 | 656.4088        | 1294.7839      | 647.8956         | 1293.7998      | 647.4036         | 11 |
| 6  | 777.4323  | 389.2198        |                |                  | 759.4217       | 380.2145         | L    | 1164.7420 | 582.8746        | 1147.7154      | 574.3614         | 1146.7314      | 573.8694         | 10 |
| 7  | 924.5007  | 462.7540        |                |                  | 906.4901       | 453.7487         | F    | 1051.6579 | 526.3326        | 1034.6314      | 517.8193         | 1033.6474      | 517.3273         | 9  |
| 8  | 1039.5276 | 520.2675        |                |                  | 1021.5171      | 511.2622         | D    | 904.5895  | 452.7984        | 887.5630       | 444.2851         | 886.5789       | 443.7931         | 8  |
| 9  | 1203.6983 | 602.3528        | 1186.6717      | 593.8395         | 1185.6877      | 593.3475         | K    | 789.5626  | 395.2849        | 772.5360       | 386.7716         | 771.5520       | 386.2796         | 7  |
| 10 | 1300.7510 | 650.8792        | 1283.7245      | 642.3659         | 1282.7405      | 641.8739         | P    | 625.3919  | 313.1996        |                |                  | 607.3814       | 304.1943         | 6  |
| 11 | 1399.8195 | 700.4134        | 1382.7929      | 691.9001         | 1381.8089      | 691.4081         | V    | 528.3392  | 264.6732        |                |                  | 510.3286       | 255.6679         | 5  |
| 12 | 1486.8515 | 743.9294        | 1469.8249      | 735.4161         | 1468.8409      | 734.9241         | S    | 429.2708  | 215.1390        |                |                  | 411.2602       | 206.1337         | 4  |
| 13 | 1583.9042 | 792.4558        | 1566.8777      | 783.9425         | 1565.8937      | 783.4505         | P    | 342.2387  | 171.6230        |                |                  |                |                  | 3  |

|    |           |          |           |          |           |          |   |          |          |  |  |  |  |   |
|----|-----------|----------|-----------|----------|-----------|----------|---|----------|----------|--|--|--|--|---|
| 14 | 1696.9883 | 848.9978 | 1679.9618 | 840.4845 | 1678.9777 | 839.9925 | L | 245.1860 | 123.0966 |  |  |  |  | 2 |
| 15 |           |          |           |          |           |          | L | 132.1019 | 66.5546  |  |  |  |  | 1 |

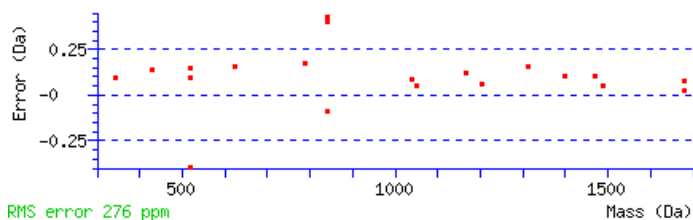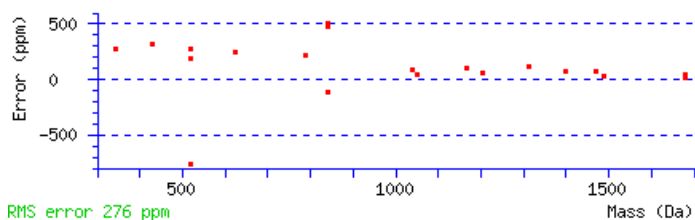

NCBI **BLAST** search of [IDDHFLFDKPVSPLL](#)

(Parameters: blastp, nr protein database, expect=20000, no filter, PAM30)

Other BLAST [web gateways](#)

#### All matches to this query

| Score | Mr(calc)  | Delta   | Sequence                           |
|-------|-----------|---------|------------------------------------|
| 46.4  | 1827.0757 | 0.0028  | <a href="#">IDDHFLFDKPVSPLL</a>    |
| 16.2  | 1827.1069 | -0.0284 | <a href="#">QLLSKTPGSRSQPLPL</a>   |
| 15.8  | 1827.0717 | 0.0068  | <a href="#">PVDAKVGLGISQSSSLP</a>  |
| 15.1  | 1826.9560 | 0.1225  | <a href="#">LCPSVPSNSVSQLOKAN</a>  |
| 12.6  | 1826.8972 | 0.1813  | <a href="#">PASSASEVASTESMPVTL</a> |
| 11.2  | 1827.0618 | 0.0167  | <a href="#">VTASPVIAVTNFRQV</a>    |
| 11.1  | 1826.9384 | 0.1401  | <a href="#">IMSIFWGMDMVILAI</a>    |
| 11.0  | 1826.8886 | 0.1899  | <a href="#">MARSRGHLWAYSPEP</a>    |
| 10.9  | 1827.0135 | 0.0651  | <a href="#">ASMPDNTAAQKVSHLLG</a>  |
| 10.9  | 1826.9978 | 0.0807  | <a href="#">LITEAQTQASGAGNKFQ</a>  |

Mascot: <http://www.matrixscience.com/>

# IDDHFLFDKPVSPLL

170711PESSAM02977\_May1 #23049-23446 RT: 99.33-101.22 AV: 14 NL: 5,82E4  
T: FTMS + p NSI Full ms [395,00-1800,00]

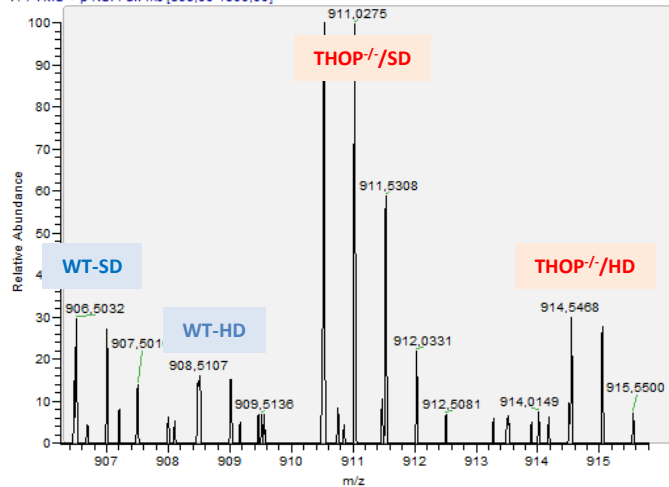

170711PESSAM02978\_May2 #22636-22732 RT: 97.90-98.20 AV: 3 NL: 2,95E5  
T: FTMS + p NSI Full ms [395,00-1800,00]

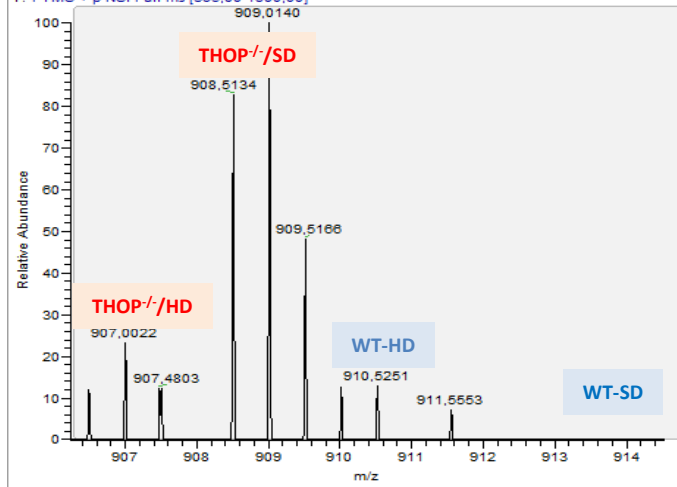

170711PESSAM02979\_May3 #23088-23167 RT: 98.01-98.13 AV: 2 NL: 3,83E5  
T: FTMS + p NSI Full ms [395,00-1800,00]

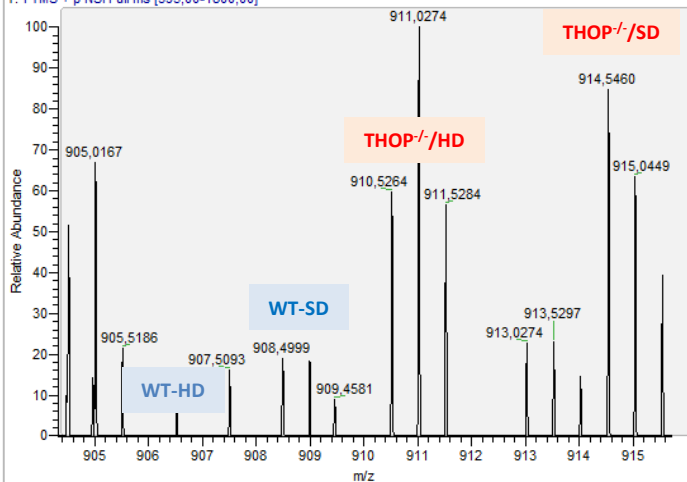

170711PESSAM02980\_May4 #22829-23268 RT: 97.26-98.84 AV: 14 NL: 1,56E5  
T: FTMS + p NSI Full ms [395,00-1800,00]

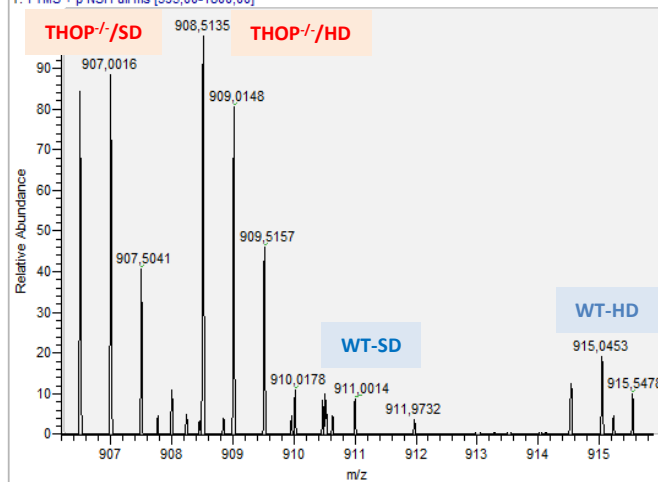

# IDDHFLFDKPVSPLL

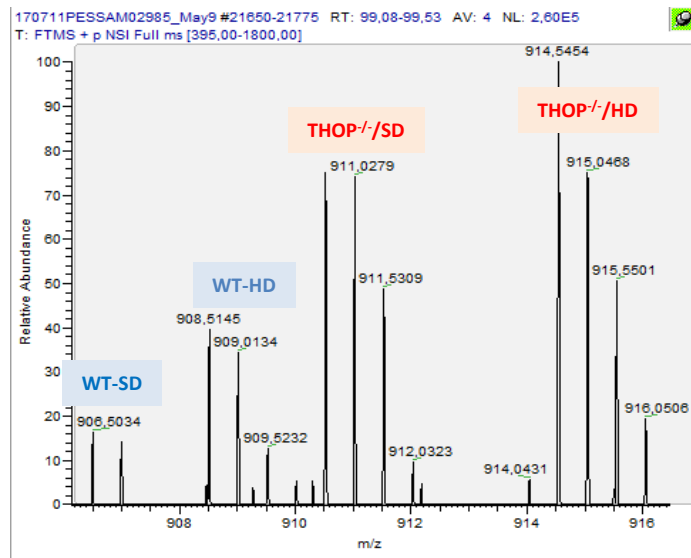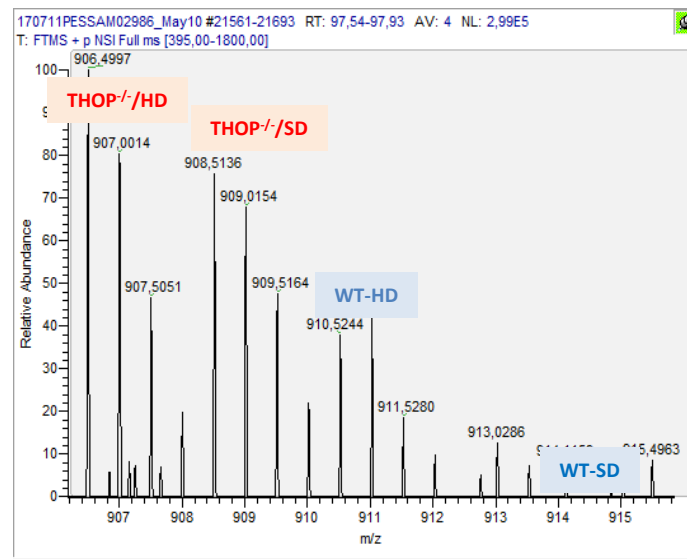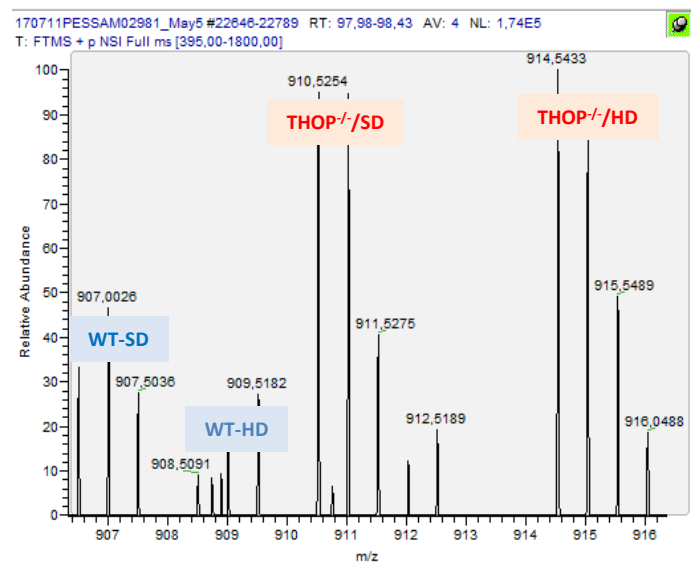

May6 –not found

# IDDHFLFDKPVSPLL

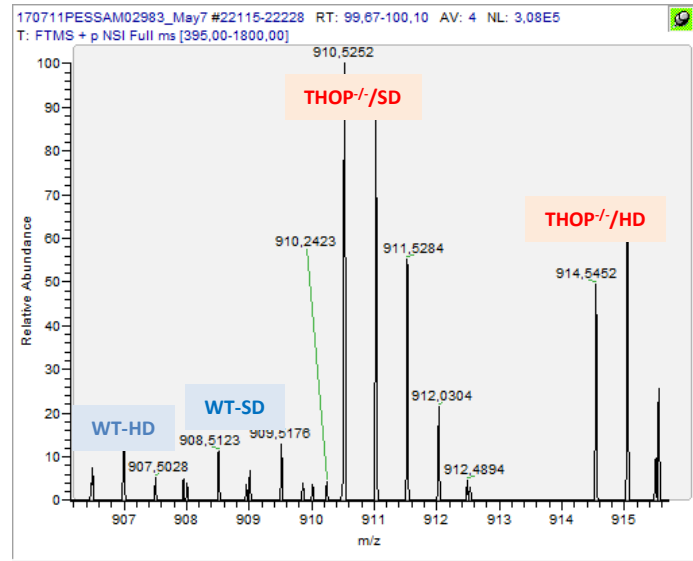

May8 –not found

# Mascot Search Results

## Peptide View

MS/MS Fragmentation of **LETTLKTQVQSVIDKA**

Found in **APOA1\_MOUSE** in **SwissProt**, Apolipoprotein A-I OS=Mus musculus GN=Apoa1 PE=1 SV=2

Match to Query 13752: 1762.070802 from(588.364210,3+) intensity(4227358.0000) scans(16013) rawscans(sn16013) rtinseconds(4398.351) index(10848)

Title: 10849: Scan 16013 (rt=4398.35) [D:\Users\Mayara - HMS Fusion data\170711PESSAM02985\_May9.raw]

Data file 170711PESSAM02985\_May9.temp.mgf

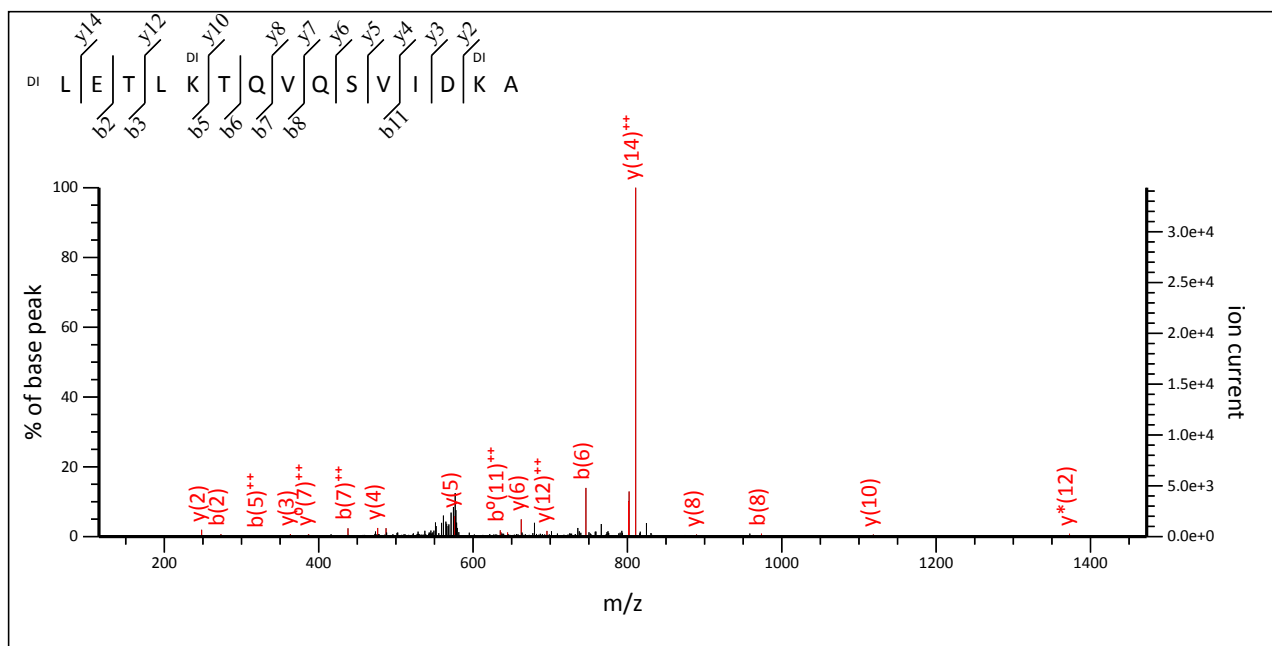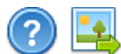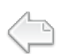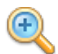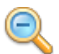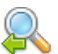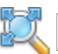

115.3

to

1472.81

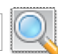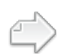

Label all possible matches ☐ Label matches used for scoring ☒

Monoisotopic mass of neutral peptide Mr(calc): 1762.0815

Variable modifications:

N-term : Dimethyl:2H(2) (N-term)

K5 : Dimethyl:2H(2) (K)

K14 : Dimethyl:2H(2) (K)

Ions Score: 38 Expect: 0.015

Matches : 30/152 fragment ions using 56 most intense peaks ([help](#))

| #  | b         | b <sup>++</sup> | b <sup>*</sup> | b <sup>+++</sup> | b <sup>0</sup> | b <sup>0++</sup> | Seq. | y         | y <sup>++</sup> | y <sup>*</sup> | y <sup>+++</sup> | y <sup>0</sup> | y <sup>0++</sup> | #  |
|----|-----------|-----------------|----------------|------------------|----------------|------------------|------|-----------|-----------------|----------------|------------------|----------------|------------------|----|
| 1  | 144.1383  | 72.5728         |                |                  |                |                  | L    |           |                 |                |                  |                |                  | 15 |
| 2  | 273.1809  | 137.0941        |                |                  | 255.1703       | 128.0888         | E    | 1619.9578 | 810.4825        | 1602.9313      | 801.9693         | 1601.9473      | 801.4773         | 14 |
| 3  | 374.2286  | 187.6179        |                |                  | 356.2180       | 178.6126         | T    | 1490.9152 | 745.9612        | 1473.8887      | 737.4480         | 1472.9047      | 736.9560         | 13 |
| 4  | 487.3126  | 244.1600        |                |                  | 469.3021       | 235.1547         | L    | 1389.8675 | 695.4374        | 1372.8410      | 686.9241         | 1371.8570      | 686.4321         | 12 |
| 5  | 645.4545  | 323.2309        | 628.4280       | 314.7176         | 627.4440       | 314.2256         | K    | 1276.7835 | 638.8954        | 1259.7569      | 630.3821         | 1258.7729      | 629.8901         | 11 |
| 6  | 746.5022  | 373.7547        | 729.4757       | 365.2415         | 728.4917       | 364.7495         | T    | 1118.6416 | 559.8244        | 1101.6150      | 551.3111         | 1100.6310      | 550.8191         | 10 |
| 7  | 874.5608  | 437.7840        | 857.5342       | 429.2708         | 856.5502       | 428.7788         | Q    | 1017.5939 | 509.3006        | 1000.5673      | 500.7873         | 999.5833       | 500.2953         | 9  |
| 8  | 973.6292  | 487.3182        | 956.6027       | 478.8050         | 955.6186       | 478.3130         | V    | 889.5353  | 445.2713        | 872.5088       | 436.7580         | 871.5247       | 436.2660         | 8  |
| 9  | 1101.6878 | 551.3475        | 1084.6612      | 542.8343         | 1083.6772      | 542.3422         | Q    | 790.4669  | 395.7371        | 773.4403       | 387.2238         | 772.4563       | 386.7318         | 7  |
| 10 | 1188.7198 | 594.8635        | 1171.6933      | 586.3503         | 1170.7093      | 585.8583         | S    | 662.4083  | 331.7078        | 645.3818       | 323.1945         | 644.3978       | 322.7025         | 6  |
| 11 | 1287.7882 | 644.3978        | 1270.7617      | 635.8845         | 1269.7777      | 635.3925         | V    | 575.3763  | 288.1918        | 558.3497       | 279.6785         | 557.3657       | 279.1865         | 5  |
| 12 | 1400.8723 | 700.9398        | 1383.8457      | 692.4265         | 1382.8617      | 691.9345         | I    | 476.3079  | 238.6576        | 459.2813       | 230.1443         | 458.2973       | 229.6523         | 4  |
| 13 | 1515.8992 | 758.4533        | 1498.8727      | 749.9400         | 1497.8887      | 749.4480         | D    | 363.2238  | 182.1155        | 346.1973       | 173.6023         | 345.2132       | 173.1103         | 3  |

|    |           |          |           |          |           |          |   |          |          |          |          |  |  |   |
|----|-----------|----------|-----------|----------|-----------|----------|---|----------|----------|----------|----------|--|--|---|
| 14 | 1674.0412 | 837.5242 | 1657.0146 | 829.0109 | 1656.0306 | 828.5189 | K | 248.1969 | 124.6021 | 231.1703 | 116.0888 |  |  | 2 |
| 15 |           |          |           |          |           |          | A | 90.0550  | 45.5311  |          |          |  |  | 1 |

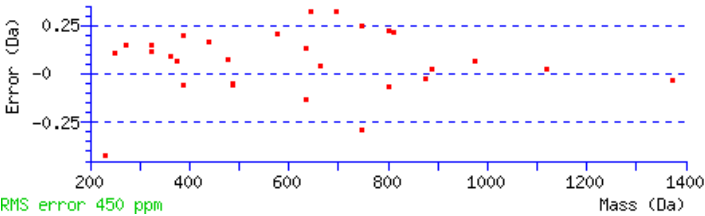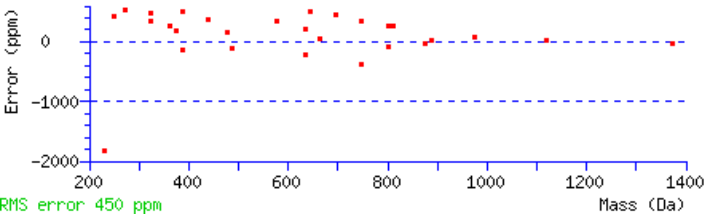

NCBI BLAST search of [LETLKTQVQSVIDKA](#)  
(Parameters: blastp, nr protein database, expect=20000, no filter, PAM30)  
Other BLAST [web gateways](#)

All matches to this query

| Score | Mr(calc)  | Delta   | Sequence                          |
|-------|-----------|---------|-----------------------------------|
| 38.2  | 1762.0815 | -0.0107 | <a href="#">LETLKTQVQSVIDKA</a>   |
| 18.3  | 1761.9625 | 0.1083  | <a href="#">LEITQDSHKGVPLEH</a>   |
| 17.4  | 1762.1008 | -0.0300 | <a href="#">LAGLGLGLSLIFIAVYL</a> |
| 16.6  | 1762.0829 | -0.0121 | <a href="#">NNLQLLSQVLPRLKA</a>   |
| 16.5  | 1762.0136 | 0.0572  | <a href="#">LAIVALISIIYMLH</a>    |
| 16.3  | 1762.0829 | -0.0121 | <a href="#">IHKAASVGDVAKVQHI</a>  |
| 16.2  | 1761.9036 | 0.1672  | <a href="#">ASGLPLVTEETPPPPGE</a> |
| 16.2  | 1761.9108 | 0.1600  | <a href="#">AEPAGLSLRADSDSGSK</a> |
| 16.1  | 1761.8818 | 0.1890  | <a href="#">GGSMPSAAISQLSSELL</a> |
| 16.0  | 1762.0262 | 0.0446  | <a href="#">SAGAVTVLKAPNRELM</a>  |

Mascot: <http://www.matrixscience.com/>

# LETLKTQVQSVIDKA

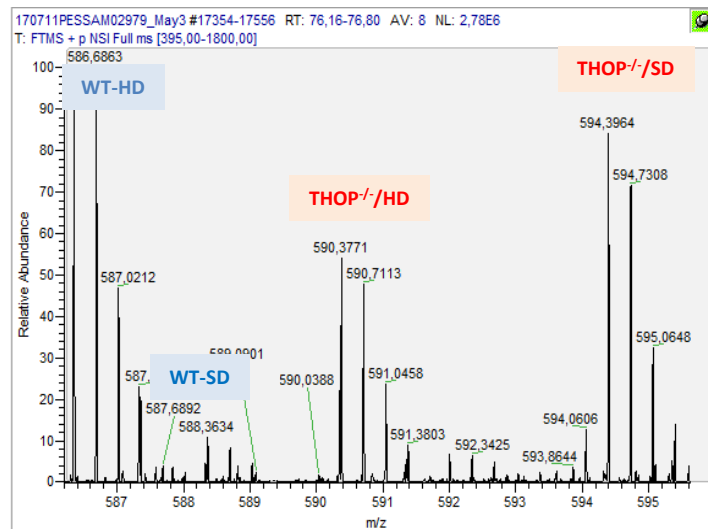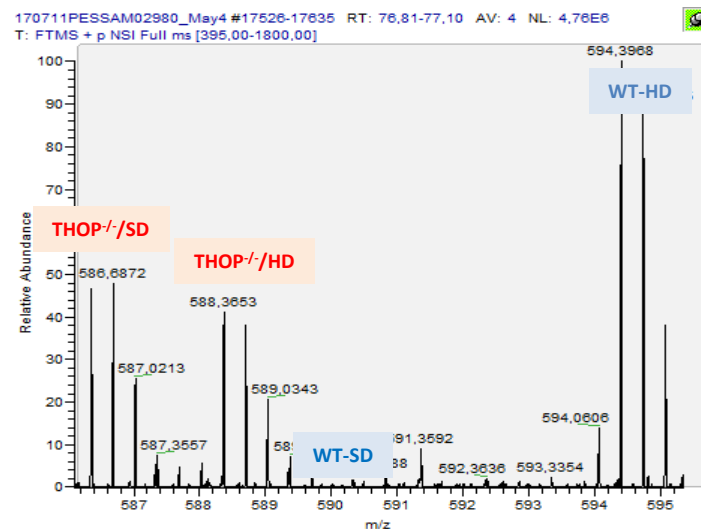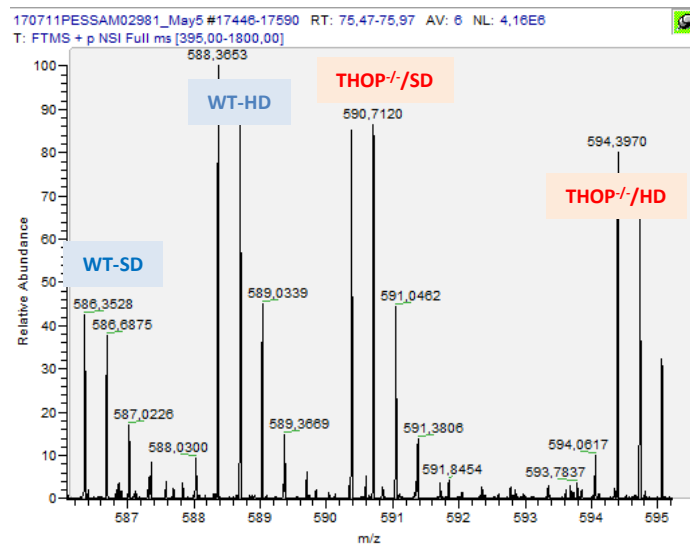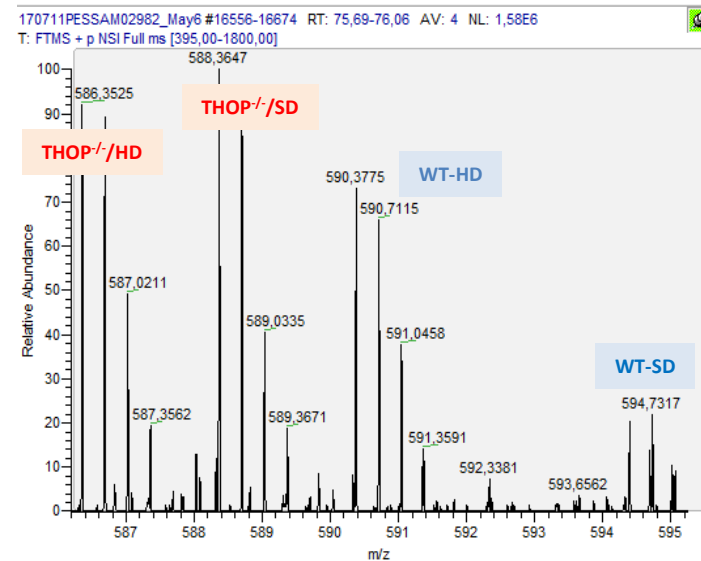

# LETLKTQVQSVIDKA

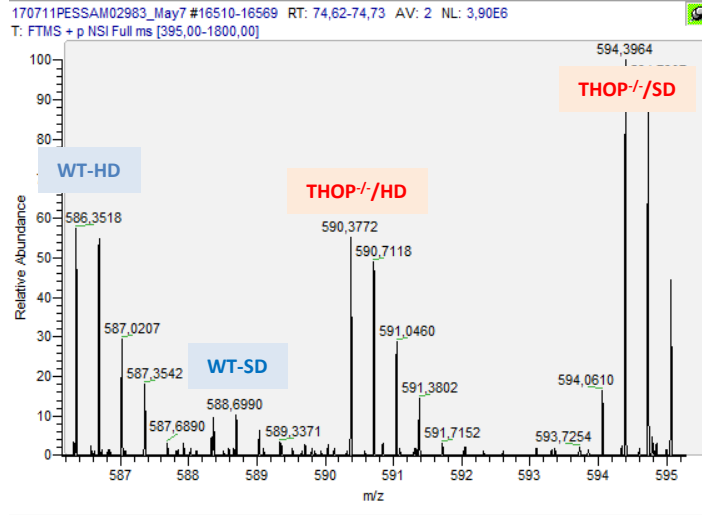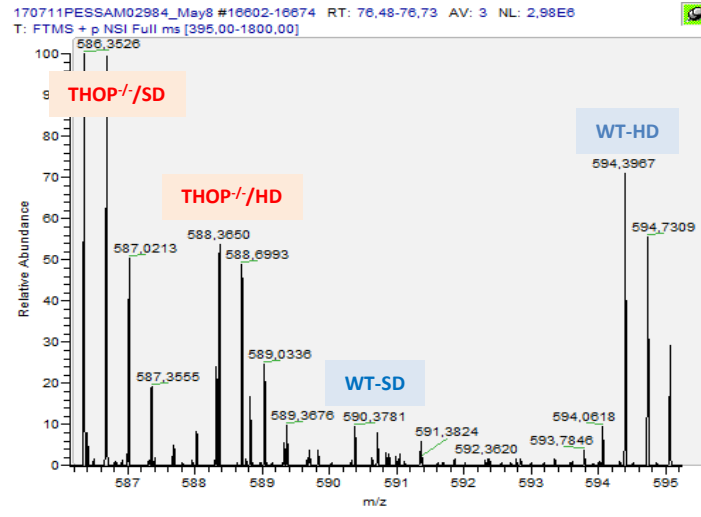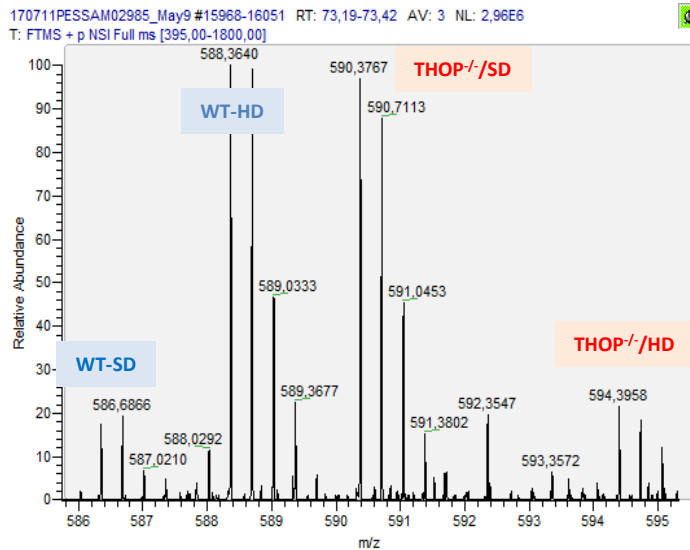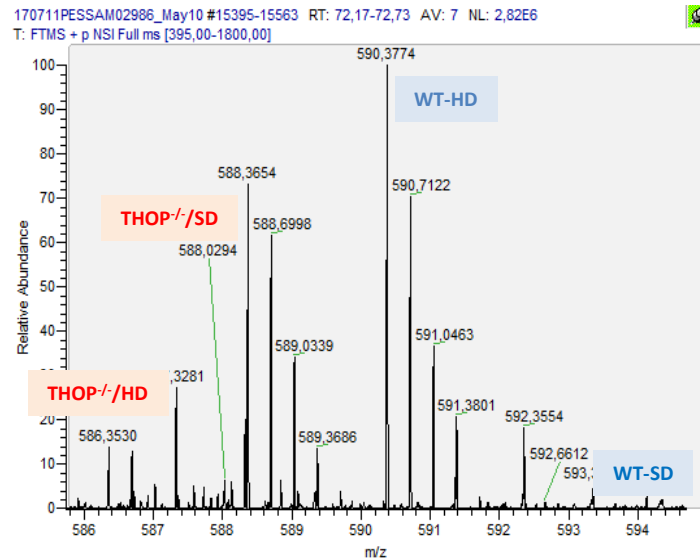

# Mascot Search Results

## Peptide View

MS/MS Fragmentation of **FSSLMNLEEK**PAPAA

Found in **APOA2\_MOUSE** in **SwissProt**, Apolipoprotein A-II OS=Mus musculus GN=Apoa2 PE=1 SV=2

Match to Query 12466: 1675.941268 from(838.977910,2+) intensity(1987756.5000) scans(16579) rawscans(sn16579)  
rtinseconds(4288.0265) index(10657)

Title: 10658: Scan 16579 (rt=4288.03) [D:\Users\Mayara - HMS Fusion data\170711PESSAM02977\_May1.raw]

Data file 170711PESSAM02977\_May1.tmp.mgf

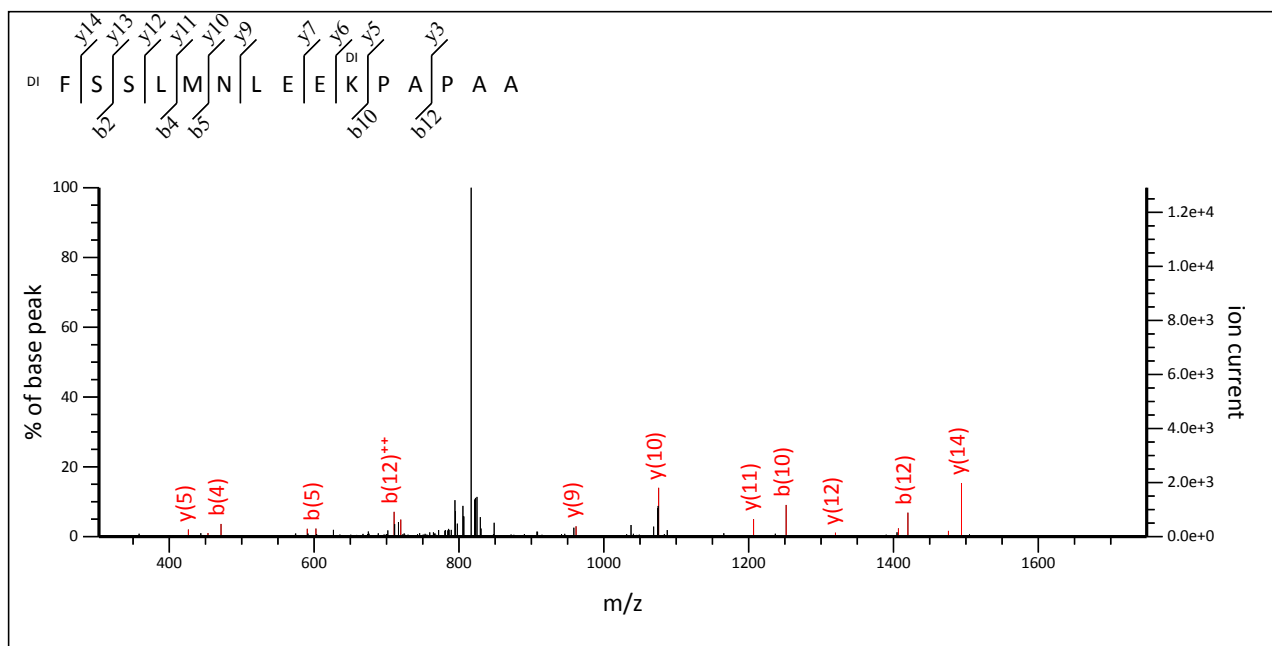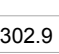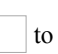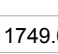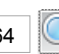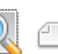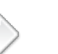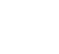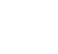

Label all possible matches ☐ Label matches used for scoring ☒

Monoisotopic mass of neutral peptide Mr(calc): 1675.9429

Variable modifications:

N-term : Dimethyl:2H(6)13C(2) (N-term)

K10 : Dimethyl:2H(6)13C(2) (K)

Ions Score: 74 Expect: 6.1e-006

Matches : 19/134 fragment ions using 25 most intense peaks ([help](#))

| #  | b         | b <sup>++</sup> | b <sup>*</sup> | b <sup>++</sup> | b <sup>0</sup> | b <sup>0++</sup> | Seq. | y         | y <sup>++</sup> | y <sup>*</sup> | y <sup>++</sup> | y <sup>0</sup> | y <sup>0++</sup> | #  |
|----|-----------|-----------------|----------------|-----------------|----------------|------------------|------|-----------|-----------------|----------------|-----------------|----------------|------------------|----|
| 1  | 184.1514  | 92.5793         |                |                 |                |                  | F    |           |                 |                |                 |                |                  | 15 |
| 2  | 271.1834  | 136.0953        |                |                 | 253.1728       | 127.0900         | S    | 1493.8061 | 747.4067        | 1476.7796      | 738.8934        | 1475.7956      | 738.4014         | 14 |
| 3  | 358.2154  | 179.6113        |                |                 | 340.2049       | 170.6061         | S    | 1406.7741 | 703.8907        | 1389.7475      | 695.3774        | 1388.7635      | 694.8854         | 13 |
| 4  | 471.2995  | 236.1534        |                |                 | 453.2889       | 227.1481         | L    | 1319.7421 | 660.3747        | 1302.7155      | 651.8614        | 1301.7315      | 651.3694         | 12 |
| 5  | 602.3400  | 301.6736        |                |                 | 584.3294       | 292.6683         | M    | 1206.6580 | 603.8326        | 1189.6315      | 595.3194        | 1188.6474      | 594.8274         | 11 |
| 6  | 716.3829  | 358.6951        | 699.3563       | 350.1818        | 698.3723       | 349.6898         | N    | 1075.6175 | 538.3124        | 1058.5910      | 529.7991        | 1057.6070      | 529.3071         | 10 |
| 7  | 829.4670  | 415.2371        | 812.4404       | 406.7238        | 811.4564       | 406.2318         | L    | 961.5746  | 481.2909        | 944.5480       | 472.7777        | 943.5640       | 472.2857         | 9  |
| 8  | 958.5095  | 479.7584        | 941.4830       | 471.2451        | 940.4990       | 470.7531         | E    | 848.4905  | 424.7489        | 831.4640       | 416.2356        | 830.4800       | 415.7436         | 8  |
| 9  | 1087.5521 | 544.2797        | 1070.5256      | 535.7664        | 1069.5416      | 535.2744         | E    | 719.4479  | 360.2276        | 702.4214       | 351.7143        | 701.4374       | 351.2223         | 7  |
| 10 | 1251.7228 | 626.3650        | 1234.6962      | 617.8518        | 1233.7122      | 617.3597         | K    | 590.4053  | 295.7063        | 573.3788       | 287.1930        |                |                  | 6  |
| 11 | 1348.7755 | 674.8914        | 1331.7490      | 666.3781        | 1330.7650      | 665.8861         | P    | 426.2347  | 213.6210        |                |                 |                |                  | 5  |
| 12 | 1419.8127 | 710.4100        | 1402.7861      | 701.8967        | 1401.8021      | 701.4047         | A    | 329.1819  | 165.0946        |                |                 |                |                  | 4  |
| 13 | 1516.8654 | 758.9363        | 1499.8389      | 750.4231        | 1498.8549      | 749.9311         | P    | 258.1448  | 129.5761        |                |                 |                |                  | 3  |

|            |                                     |          |           |          |           |          |   |          |         |  |  |  |  |   |
|------------|-------------------------------------|----------|-----------|----------|-----------|----------|---|----------|---------|--|--|--|--|---|
| 15/07/2019 | Mascot Search Results: Peptide View |          |           |          |           |          |   |          |         |  |  |  |  |   |
| 14         | 1587.9025                           | 794.4549 | 1570.8760 | 785.9416 | 1569.8920 | 785.4496 | A | 161.0921 | 81.0497 |  |  |  |  | 2 |
| 15         |                                     |          |           |          |           |          | A | 90.0550  | 45.5311 |  |  |  |  | 1 |

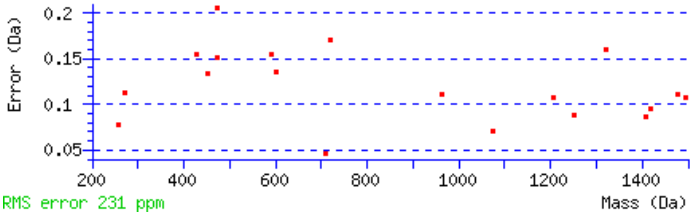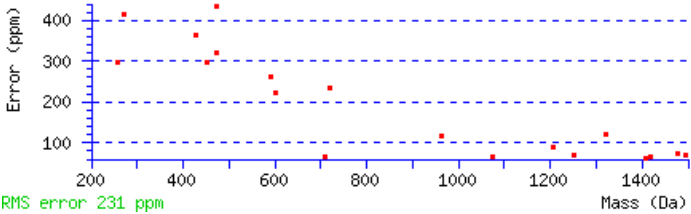

NCBI **BLAST** search of [FSSLMNLEEKAPAA](#)  
 (Parameters: blastp, nr protein database, expect=20000, no filter, PAM30)  
 Other BLAST [web gateways](#)

All matches to this query

| Score | Mr(calc)  | Delta   | Sequence                             |
|-------|-----------|---------|--------------------------------------|
| 74.2  | 1675.9429 | -0.0016 | <a href="#">FSSLMNLEEKAPAA</a>       |
| 18.0  | 1675.6775 | 0.2638  | <a href="#">FSSMIADDMSNYDE</a>       |
| 15.8  | 1675.8095 | 0.1317  | <a href="#">ELSLCHITGMREML</a>       |
| 15.3  | 1675.7402 | 0.2011  | <a href="#">HGGGTGGGGGAGGQAMDPAA</a> |
| 15.3  | 1675.8516 | 0.0897  | <a href="#">EISLPTTSTIIDGSQS</a>     |
| 14.4  | 1675.9007 | 0.0405  | <a href="#">ILCLIYTLNFAIDH</a>       |
| 14.4  | 1675.9912 | -0.0500 | <a href="#">LKHLIENFIPL</a>          |
| 14.1  | 1675.9468 | -0.0056 | <a href="#">ASASLSGTSALTGLTKR</a>    |
| 13.9  | 1675.8095 | 0.1317  | <a href="#">ELSLCHITGMREML</a>       |
| 13.2  | 1675.8473 | 0.0940  | <a href="#">RKNMPCICIHA</a>          |

Mascot: <http://www.matrixscience.com/>

# FSSLMNLEEKPAAPAA

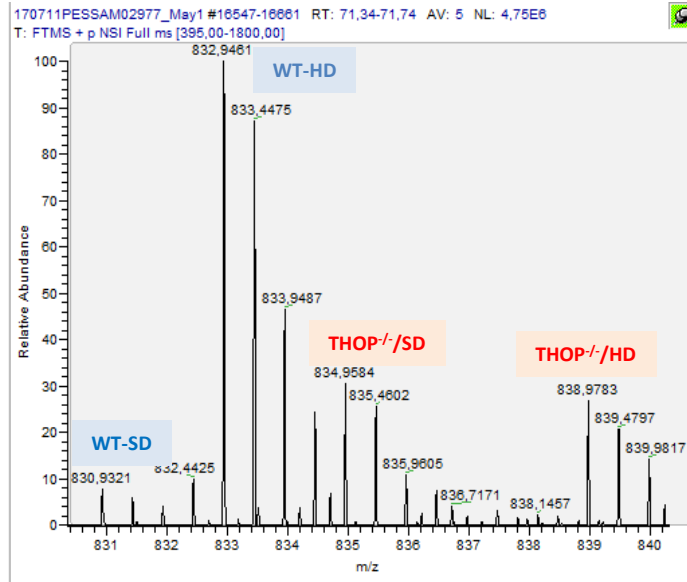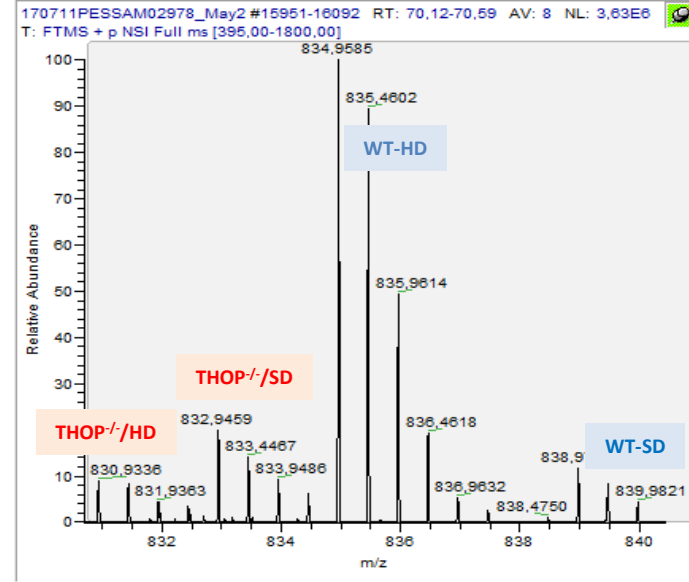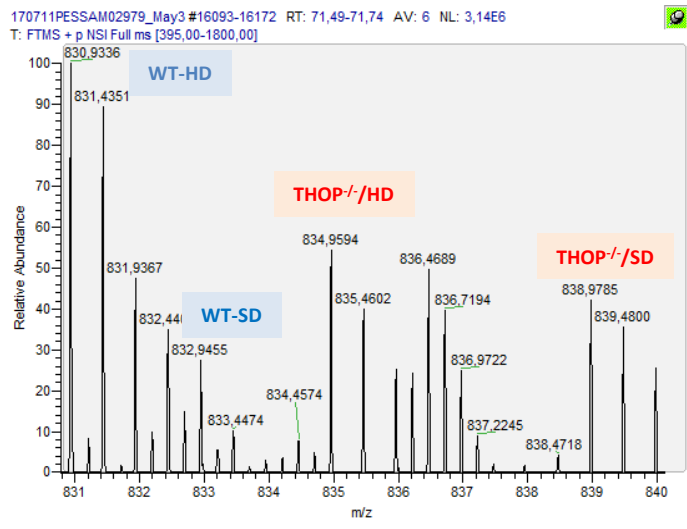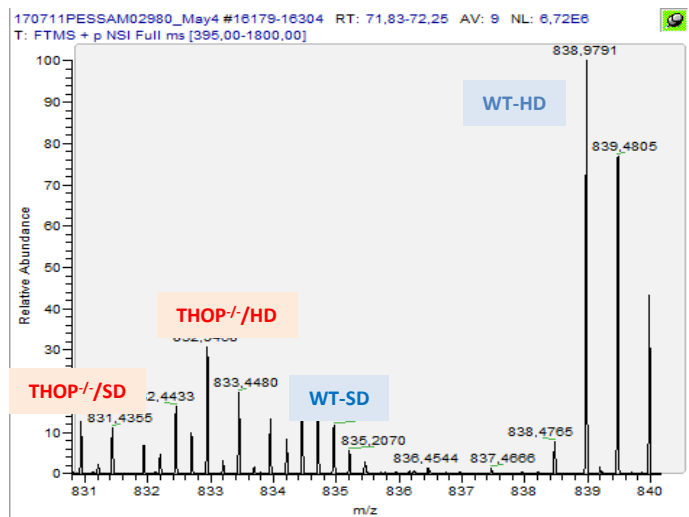

# FSSLMNLEEKPAAPAA

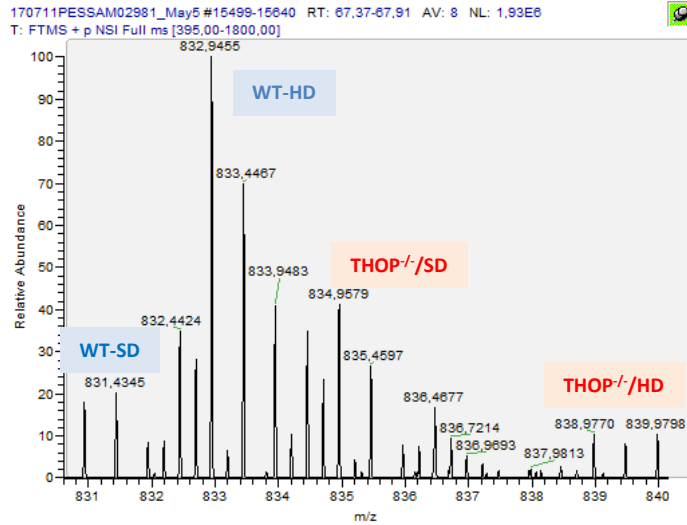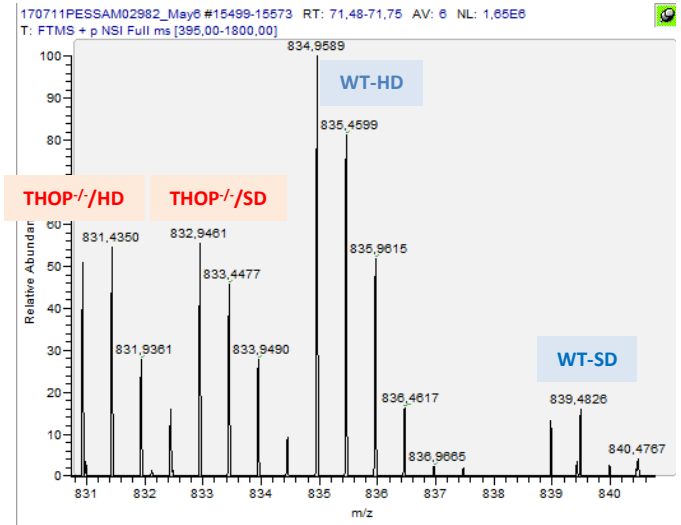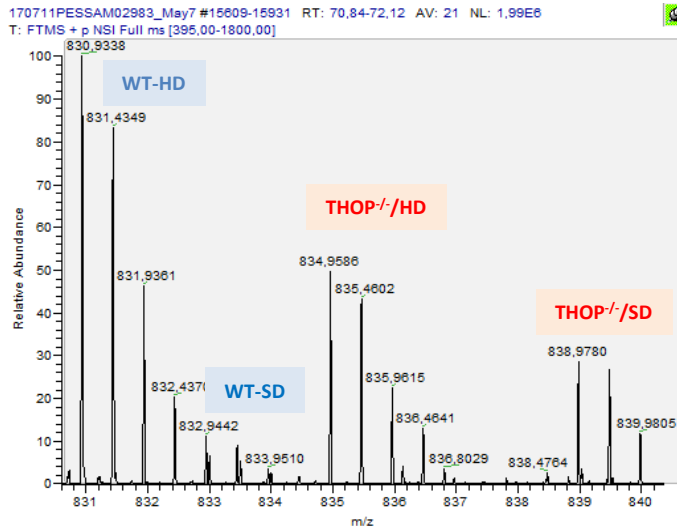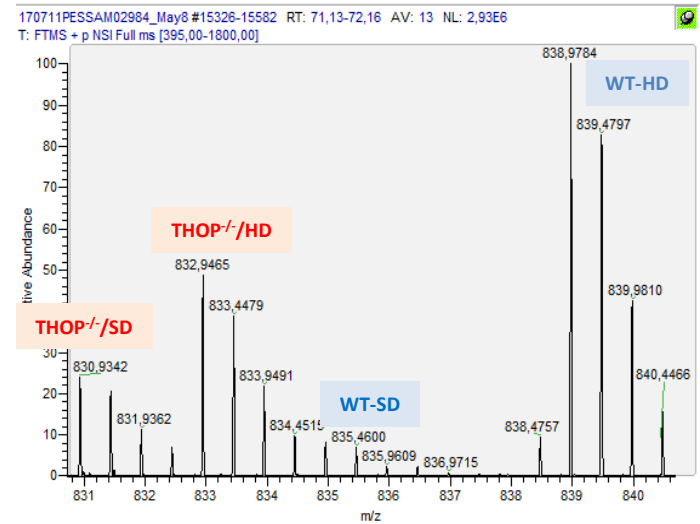

# FSSLMNLEEKPAAPAA

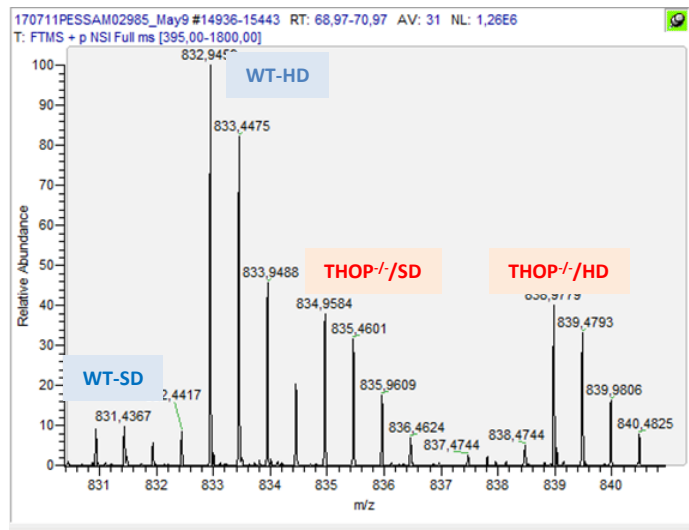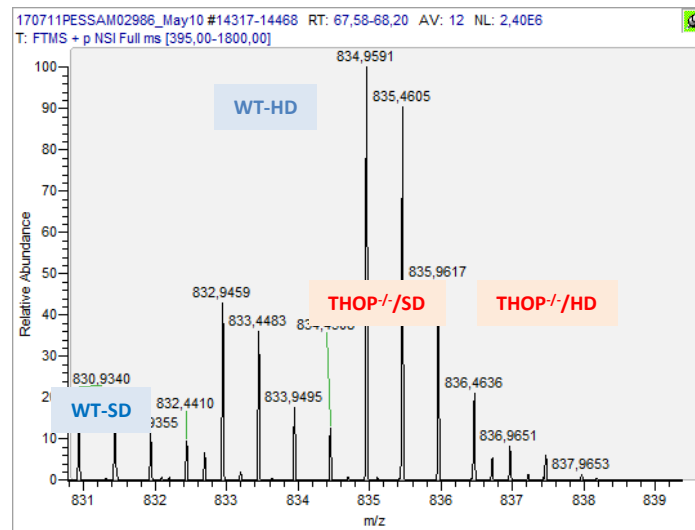

# Mascot Search Results

## Peptide View

MS/MS Fragmentation of **HEQLTPLVRSAGTSLVN**

Found in **APOA2\_MOUSE** in **SwissProt**, Apolipoprotein A-II OS=Mus musculus GN=Apoa2 PE=1 SV=2

Match to Query 14687: 1849.006168 from(925.510360,2+) intensity(1484091.9000) scans(12825) rawscans(sn12825) rtinseconds(3595.332) index(8313)

Title: 8314: Scan 12825 (rt=3595.33) [D:\Users\Mayara - HMS Fusion data\170711PESSAM02983\_May7.raw]

Data file 170711PESSAM02983\_May7.temp.mgf

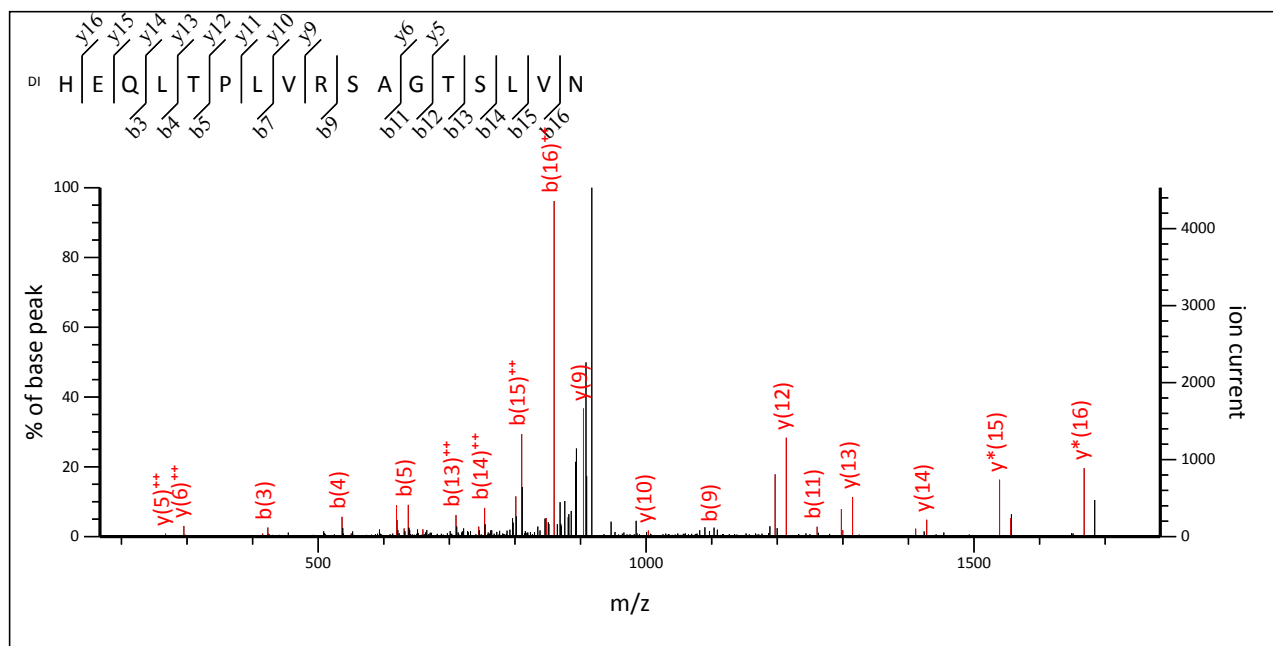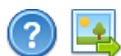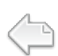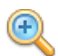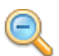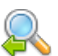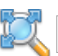

167.25 to 1784.03

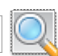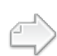

Label all possible matches ☐ Label matches used for scoring ☒

Monoisotopic mass of neutral peptide Mr(calc): 1849.0058

Variable modifications:

N-term : Dimethyl (N-term)

Ions Score: 39 Expect: 0.0088

Matches : 41/180 fragment ions using 77 most intense peaks ([help](#))

| #  | b                | b <sup>++</sup> | b <sup>*</sup>  | b <sup>+++</sup> | b <sup>0</sup>   | b <sup>0++</sup> | Seq. | y                | y <sup>++</sup> | y <sup>*</sup>   | y <sup>+++</sup> | y <sup>0</sup> | y <sup>0++</sup> | #  |
|----|------------------|-----------------|-----------------|------------------|------------------|------------------|------|------------------|-----------------|------------------|------------------|----------------|------------------|----|
| 1  | 166.0975         | 83.5524         |                 |                  |                  |                  | H    |                  |                 |                  |                  |                |                  | 17 |
| 2  | <b>295.1401</b>  | 148.0737        |                 |                  | 277.1295         | 139.0684         | E    | 1684.9228        | 842.9651        | <b>1667.8963</b> | 834.4518         | 1666.9123      | 833.9598         | 16 |
| 3  | <b>423.1987</b>  | 212.1030        | 406.1721        | 203.5897         | 405.1881         | 203.0977         | Q    | <b>1555.8802</b> | 778.4438        | <b>1538.8537</b> | 769.9305         | 1537.8697      | 769.4385         | 15 |
| 4  | <b>536.2827</b>  | <b>268.6450</b> | 519.2562        | 260.1317         | 518.2722         | 259.6397         | L    | <b>1427.8217</b> | 714.4145        | <b>1410.7951</b> | 705.9012         | 1409.8111      | 705.4092         | 14 |
| 5  | <b>637.3304</b>  | 319.1688        | <b>620.3039</b> | 310.6556         | <b>619.3198</b>  | 310.1636         | T    | <b>1314.7376</b> | 657.8724        | <b>1297.7110</b> | 649.3592         | 1296.7270      | 648.8672         | 13 |
| 6  | 734.3832         | 367.6952        | 717.3566        | 359.1819         | 716.3726         | 358.6899         | P    | <b>1213.6899</b> | 607.3486        | <b>1196.6634</b> | 598.8353         | 1195.6793      | 598.3433         | 12 |
| 7  | <b>847.4672</b>  | <b>424.2373</b> | 830.4407        | <b>415.7240</b>  | 829.4567         | <b>415.2320</b>  | L    | 1116.6371        | 558.8222        | 1099.6106        | <b>550.3089</b>  | 1098.6266      | <b>549.8169</b>  | 11 |
| 8  | 946.5356         | 473.7715        | 929.5091        | 465.2582         | 928.5251         | 464.7662         | V    | <b>1003.5531</b> | 502.2802        | <b>986.5265</b>  | 493.7669         | 985.5425       | 493.2749         | 10 |
| 9  | <b>1102.6368</b> | 551.8220        | 1085.6102       | 543.3087         | 1084.6262        | 542.8167         | R    | <b>904.4847</b>  | 452.7460        | 887.4581         | 444.2327         | 886.4741       | 443.7407         | 9  |
| 10 | 1189.6688        | 595.3380        | 1172.6422       | 586.8248         | 1171.6582        | 586.3327         | S    | 748.3836         | 374.6954        | 731.3570         | 366.1821         | 730.3730       | 365.6901         | 8  |
| 11 | <b>1260.7059</b> | <b>630.8566</b> | 1243.6793       | 622.3433         | 1242.6953        | 621.8513         | A    | 661.3515         | 331.1794        | 644.3250         | 322.6661         | 643.3410       | 322.1741         | 7  |
| 12 | 1317.7274        | <b>659.3673</b> | 1300.7008       | 650.8540         | <b>1299.7168</b> | 650.3620         | G    | 590.3144         | <b>295.6608</b> | 573.2879         | 287.1476         | 572.3039       | 286.6556         | 6  |
| 13 | 1418.7750        | <b>709.8912</b> | 1401.7485       | 701.3779         | 1400.7645        | 700.8859         | T    | 533.2930         | <b>267.1501</b> | 516.2664         | 258.6368         | 515.2824       | 258.1448         | 5  |
| 14 | 1505.8071        | <b>753.4072</b> | 1488.7805       | <b>744.8939</b>  | 1487.7965        | <b>744.4019</b>  | S    | 432.2453         | 216.6263        | <b>415.2187</b>  | 208.1130         | 414.2347       | 207.6210         | 4  |

|    |           |          |           |          |           |          |   |          |          |          |          |  |  |   |
|----|-----------|----------|-----------|----------|-----------|----------|---|----------|----------|----------|----------|--|--|---|
| 15 | 1618.8911 | 809.9492 | 1601.8646 | 801.4359 | 1600.8806 | 800.9439 | L | 345.2132 | 173.1103 | 328.1867 | 164.5970 |  |  | 3 |
| 16 | 1717.9595 | 859.4834 | 1700.9330 | 850.9701 | 1699.9490 | 850.4781 | V | 232.1292 | 116.5682 | 215.1026 | 108.0550 |  |  | 2 |
| 17 |           |          |           |          |           |          | N | 133.0608 | 67.0340  | 116.0342 | 58.5207  |  |  | 1 |

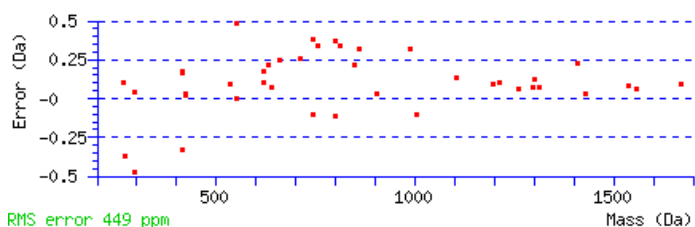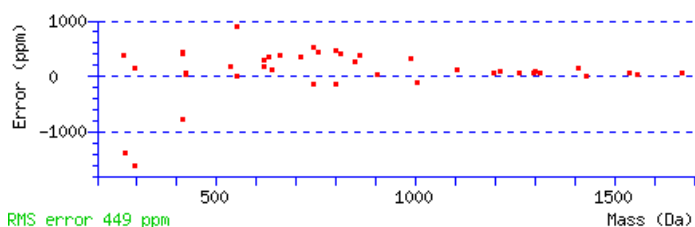

NCBI BLAST search of [HEQLTPLVRSAGTSLVN](#)

(Parameters: blastp, nr protein database, expect=20000, no filter, PAM30)

Other BLAST [web gateways](#)

#### All matches to this query

| Score | Mr(calc)  | Delta   | Sequence                          |
|-------|-----------|---------|-----------------------------------|
| 39.2  | 1849.0058 | 0.0004  | <a href="#">HEQLTPLVRSAGTSLVN</a> |
| 16.9  | 1848.9159 | 0.0903  | <a href="#">EGFEQAARDYTLRTE</a>   |
| 16.5  | 1848.9059 | 0.1002  | <a href="#">AISDIMSSDQETYSCK</a>  |
| 16.3  | 1849.0713 | -0.0651 | <a href="#">PALLLTALEQHVLYLQ</a>  |
| 15.4  | 1848.9846 | 0.0216  | <a href="#">IQQALHRPPSSAAQYL</a>  |
| 15.2  | 1849.0273 | -0.0211 | <a href="#">EEQLTLVRLSRPCAQA</a>  |
| 14.6  | 1849.0098 | -0.0036 | <a href="#">VTPATEPRNAQTQLQLY</a> |
| 14.5  | 1849.0814 | -0.0752 | <a href="#">RDKEFQSHLTSHEK</a>    |
| 14.5  | 1848.8418 | 0.1644  | <a href="#">FSPEDYQSTAGTLEFQ</a>  |
| 14.4  | 1849.1164 | -0.1102 | <a href="#">LAQALNEALKPTLQYL</a>  |

Mascot: <http://www.matrixscience.com/>

# HEQLTPLVRSAGTSLVN

170711PESSAM02977\_May1 #13830-13956 RT: 61.52-61.89 AV: 7 NL: 8.11E5  
T: FTMS + p NSI Full ms [395.00-1800.00]

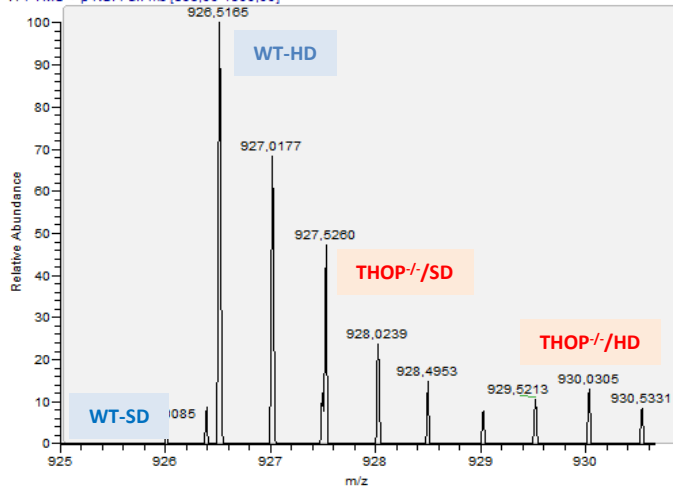

170711PESSAM02978\_May2 #13265-13557 RT: 60.69-61.63 AV: 19 NL: 3.00E5  
T: FTMS + p NSI Full ms [395.00-1800.00]

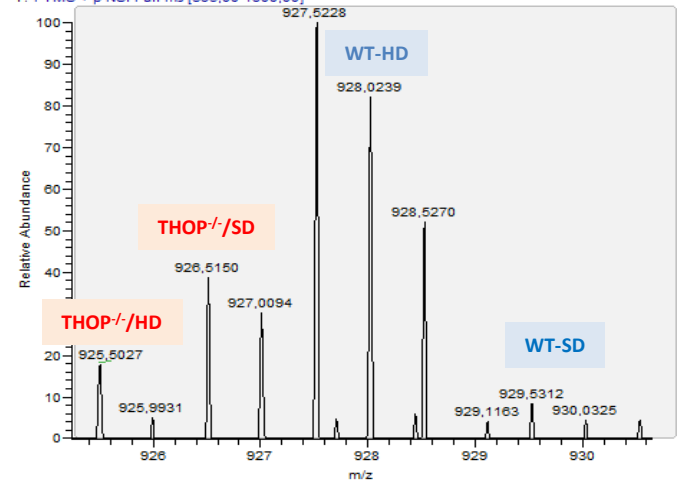

170711PESSAM02981\_May5 #12069-12203 RT: 54.87-55.30 AV: 11 NL: 1.65E6  
T: FTMS + p NSI Full ms [395.00-1800.00]

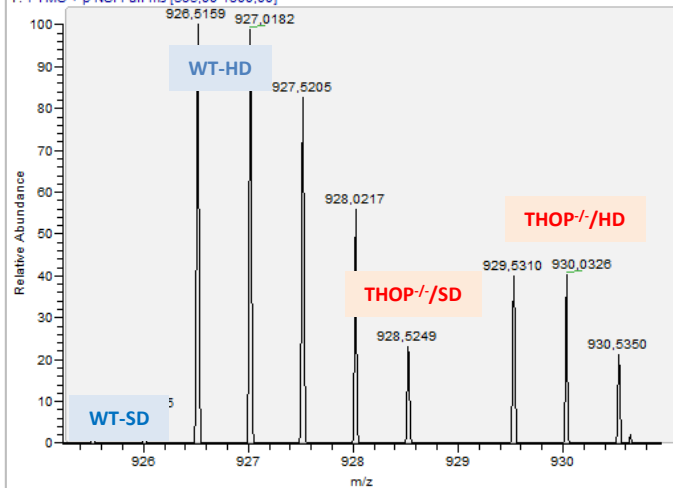

170711PESSAM02982\_May6 #12646-12803 RT: 60.71-61.29 AV: 12 NL: 2.09E5  
T: FTMS + p NSI Full ms [395.00-1800.00]

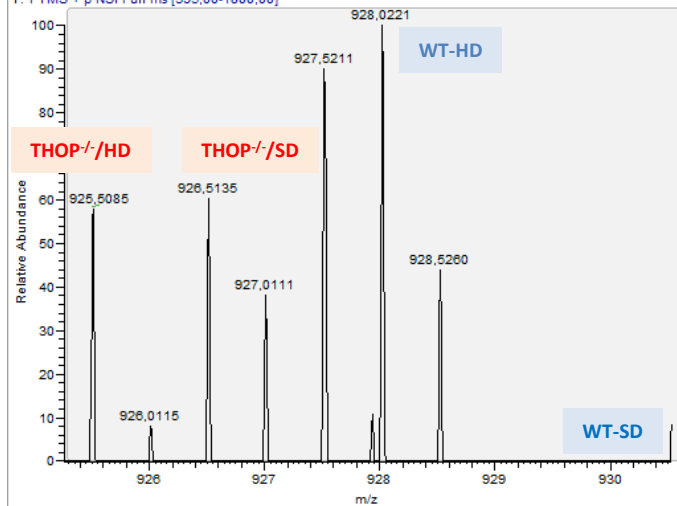

# HEQLTPLVRSAGTSLVN

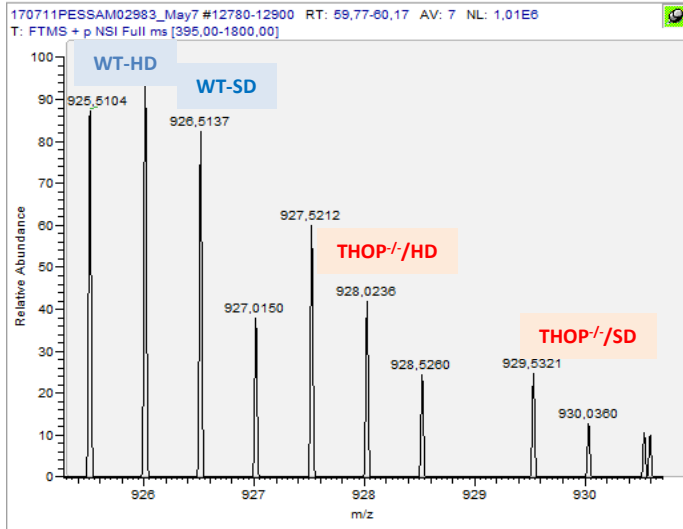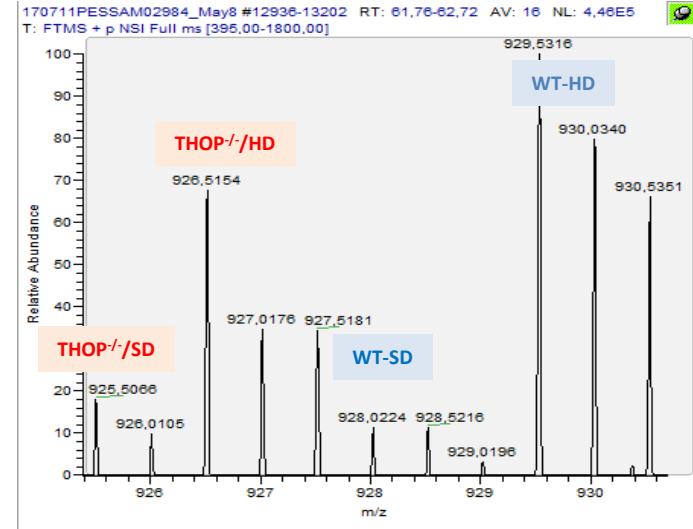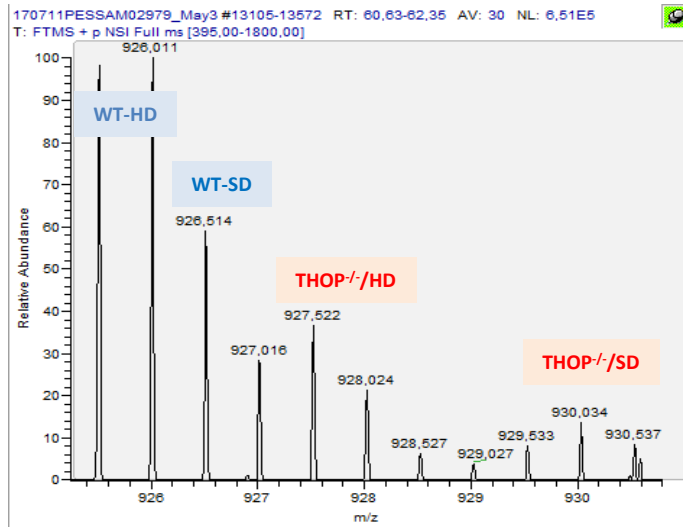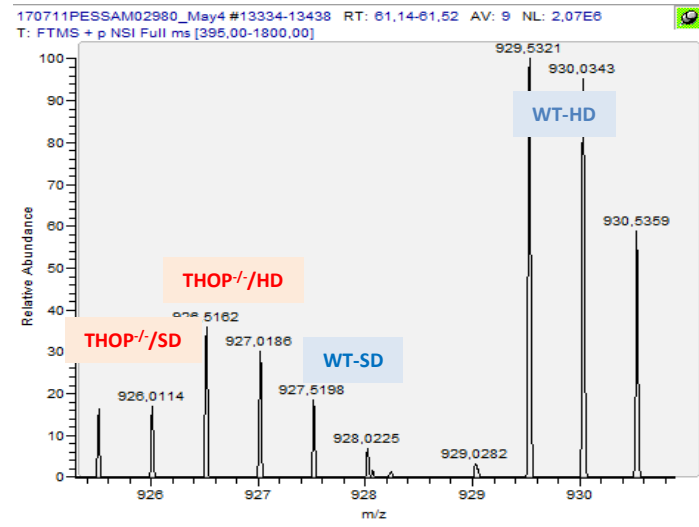

# Mascot Search Results

## Peptide View

MS/MS Fragmentation of **SQTFPNADFAEITKL**

Found in **ALBU\_MOUSE** in **SwissProt**, Serum albumin OS=Mus musculus GN=Alb PE=1 SV=3

Match to Query 13506: 1752.982588 from(877.498570,2+) intensity(2773684.7000) scans(21840-21901) rawscans(sn21840:sn21901)  
rtinseconds(5595.796-5612.719) index(14323)

Title: 14324: Sum of 3 scans in range 21840 (rt=5595.8) to 21901 (rt=5612.72) [D:\Users\Mayara - HMS Fusion

data\170711PESSAM02977\_May1.raw]

Data file 170711PESSAM02977\_May1.temp.mgf

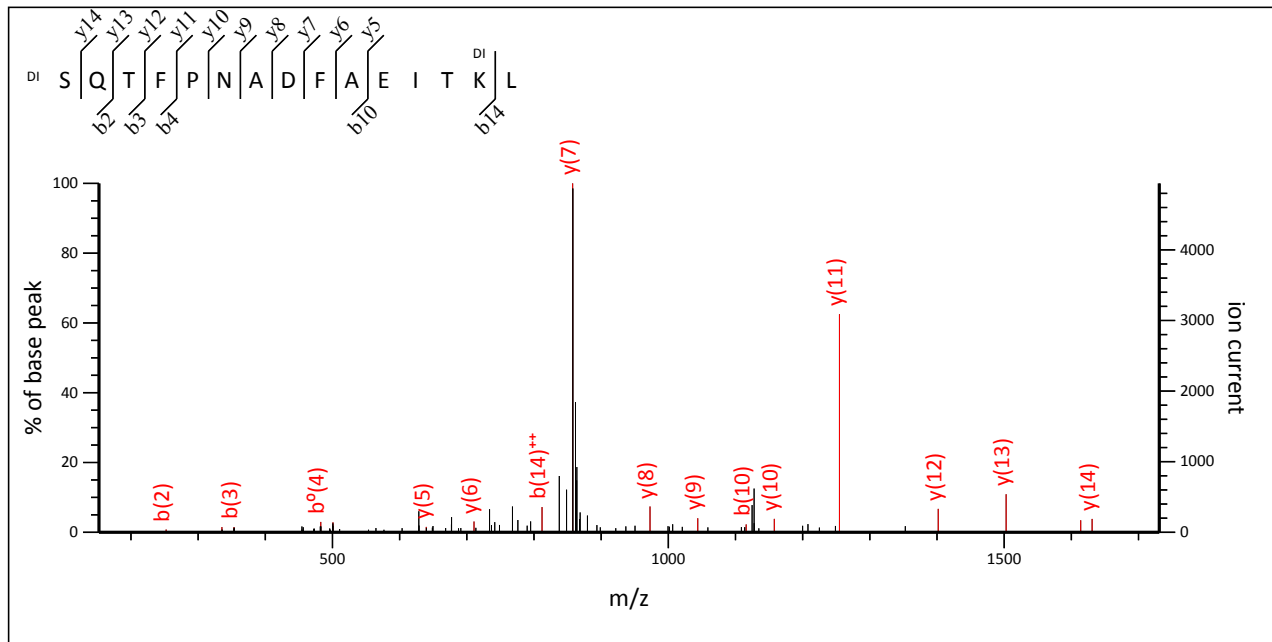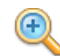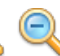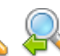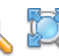

152.37

to

1730.94

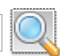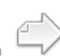

Label all possible matches ☐ Label matches used for scoring ☒

Monoisotopic mass of neutral peptide Mr(calc): 1752.9872

Variable modifications:

N-term : Dimethyl:2H(6)13C(2) (N-term)

K14 : Dimethyl:2H(6)13C(2) (K)

Ions Score: 59 Expect: 9.9e-005

Matches : 18/160 fragment ions using 44 most intense peaks ([help](#))

| #  | b         | b <sup>++</sup> | b <sup>*</sup> | b <sup>*++</sup> | b <sup>0</sup> | b <sup>0++</sup> | Seq. | y         | y <sup>++</sup> | y <sup>*</sup> | y <sup>*++</sup> | y <sup>0</sup> | y <sup>0++</sup> | #  |
|----|-----------|-----------------|----------------|------------------|----------------|------------------|------|-----------|-----------------|----------------|------------------|----------------|------------------|----|
| 1  | 124.1150  | 62.5611         |                |                  | 106.1044       | 53.5558          | S    |           |                 |                |                  |                |                  | 15 |
| 2  | 252.1736  | 126.5904        | 235.1470       | 118.0771         | 234.1630       | 117.5851         | Q    | 1630.8868 | 815.9470        | 1613.8603      | 807.4338         | 1612.8763      | 806.9418         | 14 |
| 3  | 353.2212  | 177.1143        | 336.1947       | 168.6010         | 335.2107       | 168.1090         | T    | 1502.8282 | 751.9178        | 1485.8017      | 743.4045         | 1484.8177      | 742.9125         | 13 |
| 4  | 500.2896  | 250.6485        | 483.2631       | 242.1352         | 482.2791       | 241.6432         | F    | 1401.7806 | 701.3939        | 1384.7540      | 692.8806         | 1383.7700      | 692.3886         | 12 |
| 5  | 597.3424  | 299.1748        | 580.3159       | 290.6616         | 579.3318       | 290.1696         | P    | 1254.7122 | 627.8597        | 1237.6856      | 619.3464         | 1236.7016      | 618.8544         | 11 |
| 6  | 711.3853  | 356.1963        | 694.3588       | 347.6830         | 693.3748       | 347.1910         | N    | 1157.6594 | 579.3333        | 1140.6328      | 570.8201         | 1139.6488      | 570.3280         | 10 |
| 7  | 782.4224  | 391.7149        | 765.3959       | 383.2016         | 764.4119       | 382.7096         | A    | 1043.6165 | 522.3119        | 1026.5899      | 513.7986         | 1025.6059      | 513.3066         | 9  |
| 8  | 897.4494  | 449.2283        | 880.4228       | 440.7151         | 879.4388       | 440.2231         | D    | 972.5793  | 486.7933        | 955.5528       | 478.2800         | 954.5688       | 477.7880         | 8  |
| 9  | 1044.5178 | 522.7625        | 1027.4913      | 514.2493         | 1026.5072      | 513.7573         | F    | 857.5524  | 429.2798        | 840.5259       | 420.7666         | 839.5418       | 420.2746         | 7  |
| 10 | 1115.5549 | 558.2811        | 1098.5284      | 549.7678         | 1097.5444      | 549.2758         | A    | 710.4840  | 355.7456        | 693.4574       | 347.2324         | 692.4734       | 346.7403         | 6  |
| 11 | 1244.5975 | 622.8024        | 1227.5710      | 614.2891         | 1226.5869      | 613.7971         | E    | 639.4469  | 320.2271        | 622.4203       | 311.7138         | 621.4363       | 311.2218         | 5  |
| 12 | 1357.6816 | 679.3444        | 1340.6550      | 670.8312         | 1339.6710      | 670.3391         | I    | 510.4043  | 255.7058        | 493.3777       | 247.1925         | 492.3937       | 246.7005         | 4  |
| 13 | 1458.7293 | 729.8683        | 1441.7027      | 721.3550         | 1440.7187      | 720.8630         | T    | 397.3202  | 199.1637        | 380.2937       | 190.6505         | 379.3097       | 190.1585         | 3  |

|    |           |          |           |          |           |          |   |          |          |          |          |  |  |   |
|----|-----------|----------|-----------|----------|-----------|----------|---|----------|----------|----------|----------|--|--|---|
| 14 | 1622.8999 | 811.9536 | 1605.8733 | 803.4403 | 1604.8893 | 802.9483 | K | 296.2725 | 148.6399 | 279.2460 | 140.1266 |  |  | 2 |
| 15 |           |          |           |          |           |          | L | 132.1019 | 66.5546  |          |          |  |  | 1 |

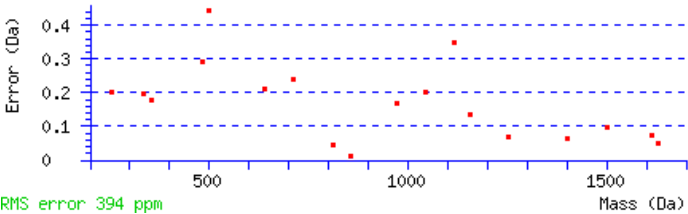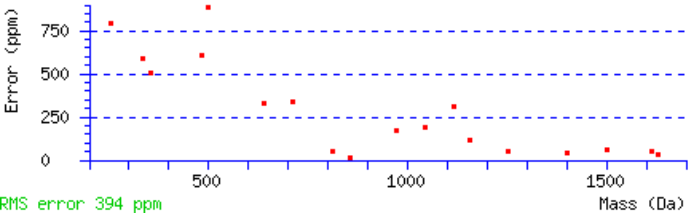

NCBI BLAST search of [SQTFPNADFAEITKL](#)  
(Parameters: blastp, nr protein database, expect=20000, no filter, PAM30)  
Other BLAST [web gateways](#)

All matches to this query

| Score | Mr(calc)  | Delta   | Sequence                            |
|-------|-----------|---------|-------------------------------------|
| 59.0  | 1752.9872 | -0.0047 | <a href="#">SQTFPNADFAEITKL</a>     |
| 15.6  | 1752.9895 | -0.0070 | <a href="#">GILSPGVALGTAGGAMSSK</a> |
| 12.3  | 1753.0552 | -0.0726 | <a href="#">HLPPTLAAPGQPLRVL</a>    |
| 10.9  | 1752.9762 | 0.0063  | <a href="#">SQTMAPLKTVGTLGMM</a>    |
| 10.8  | 1752.9633 | 0.0192  | <a href="#">LFTPGSRIESILMSL</a>     |
| 10.5  | 1752.9183 | 0.0643  | <a href="#">SIMQSQSVMLPLVPGD</a>    |
| 10.1  | 1752.9035 | 0.0790  | <a href="#">TNTNGTNGNLVPVTN</a>     |
| 10.1  | 1752.9048 | 0.0777  | <a href="#">GSAPRHGSARSGPAPEPS</a>  |
| 9.9   | 1753.0387 | -0.0561 | <a href="#">KKEDIFASSPMSGTK</a>     |
| 9.9   | 1752.7168 | 0.2658  | <a href="#">NCCEDTQASMQQVHQ</a>     |

Mascot: <http://www.matrixscience.com/>

# SQTFPNADFAEITKL

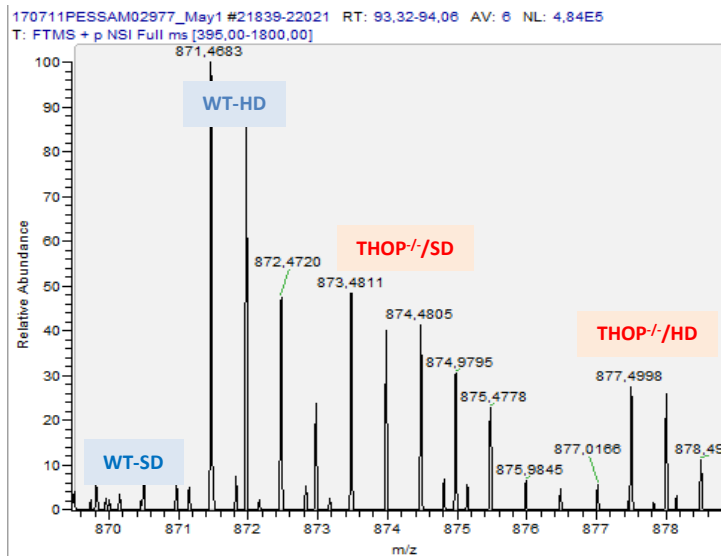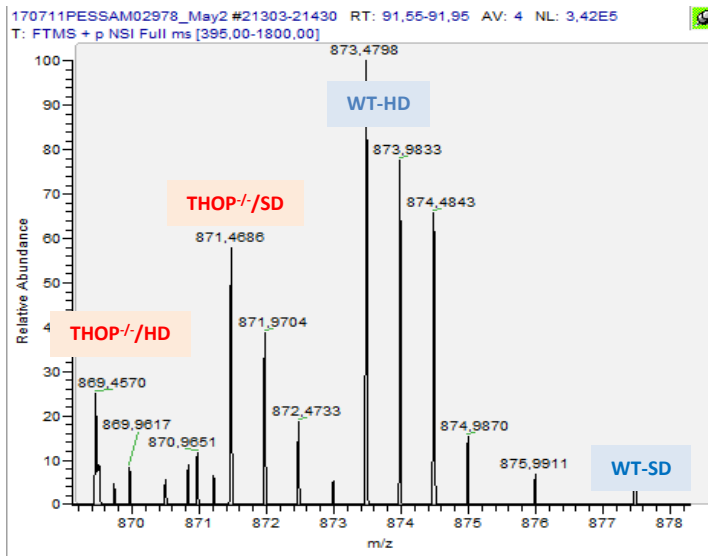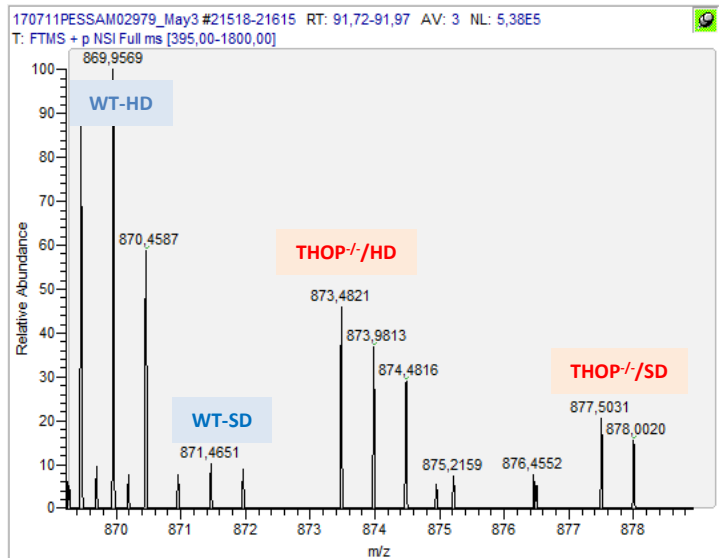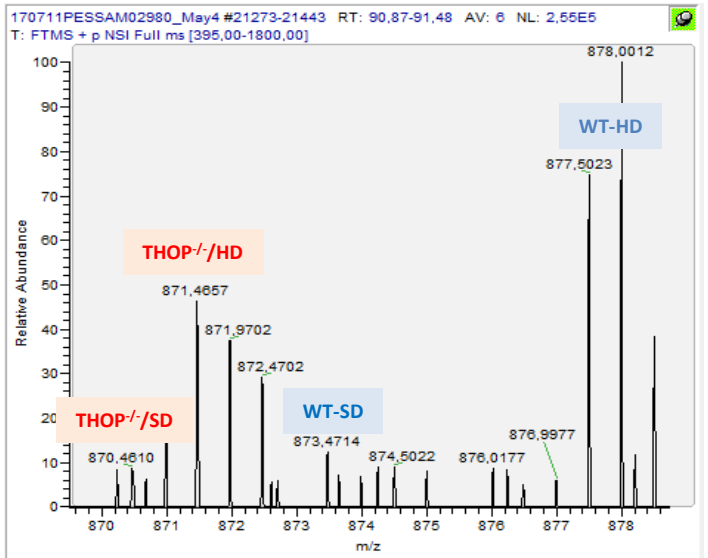

# SQTFPNADFAEITKL

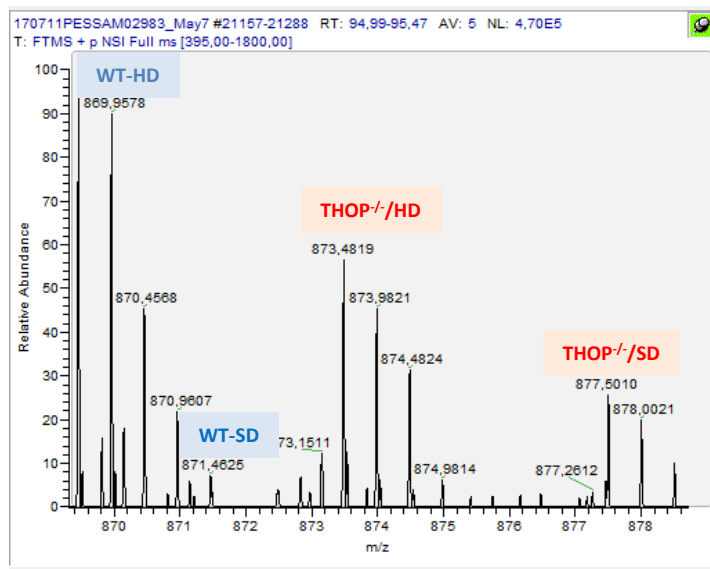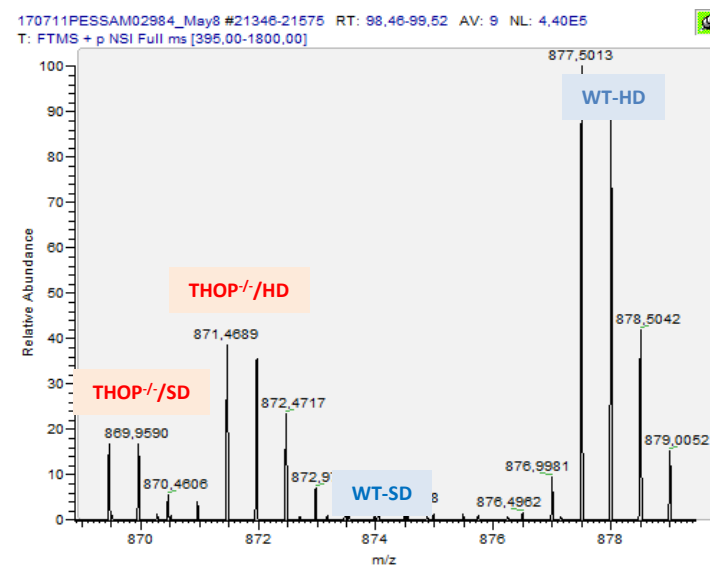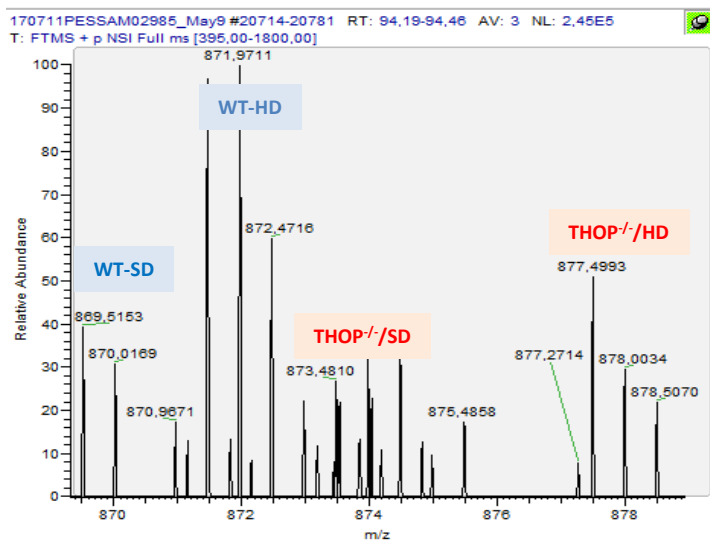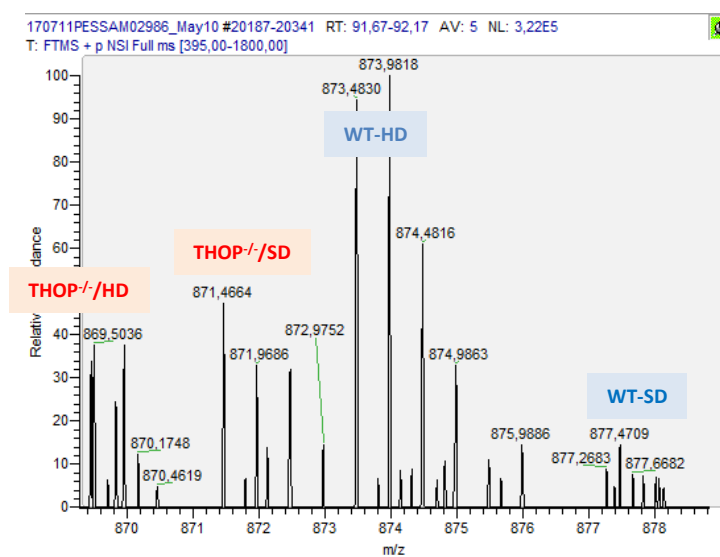

# Mascot Search Results

## Peptide View

MS/MS Fragmentation of **ADSDLLALMTGKMNPQSA**

Found in **NLTP\_MOUSE** in **SwissProt**, Non-specific lipid-transfer protein OS=Mus musculus GN=Scp2 PE=1 SV=3

Match to Query 15454: 1917.951368 from(959.982960,2+) intensity(389329.7200) scans(21991) rawscans(sn21991) rtinseconds(5940.3122) index(14787)

Title: 14788: Scan 21991 (rt=5940.31) [D:\Users\Mayara - HMS Fusion data\170711PESSAM02983\_May7.raw]

Data file 170711PESSAM02983\_May7.temp.mgf

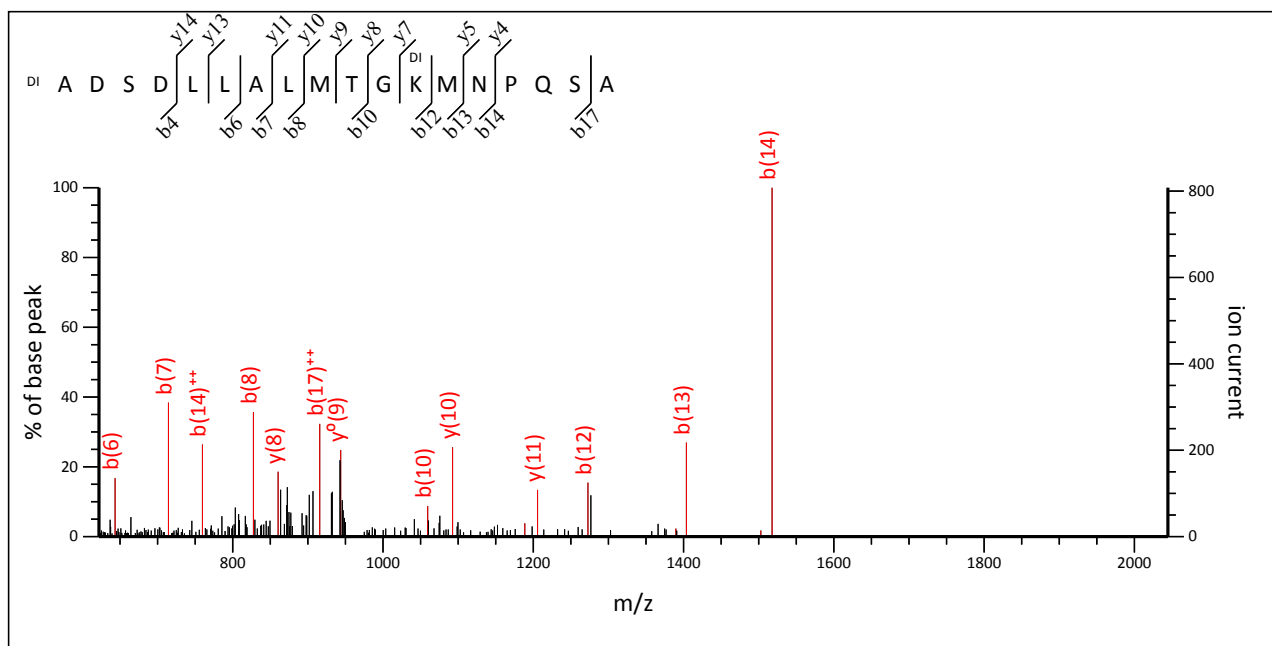

621.98

to

2044.58

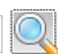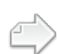

Label all possible matches ☐ Label matches used for scoring ☒

Monoisotopic mass of neutral peptide Mr(calc): 1917.9540

Variable modifications:

N-term : Dimethyl (N-term)

K12 : Dimethyl (K)

Ions Score: 78 Expect: 1.5e-005

Matches : 24/174 fragment ions using 25 most intense peaks ([help](#))

| #  | b         | b <sup>++</sup> | b <sup>*</sup> | b <sup>+++</sup> | b <sup>0</sup> | b <sup>0++</sup> | Seq. | y         | y <sup>++</sup> | y <sup>*</sup> | y <sup>+++</sup> | y <sup>0</sup> | y <sup>0++</sup> | #  |
|----|-----------|-----------------|----------------|------------------|----------------|------------------|------|-----------|-----------------|----------------|------------------|----------------|------------------|----|
| 1  | 100.0757  | 50.5415         |                |                  |                |                  | A    |           |                 |                |                  |                |                  | 18 |
| 2  | 215.1026  | 108.0550        |                |                  | 197.0921       | 99.0497          | D    | 1819.8928 | 910.4501        | 1802.8663      | 901.9368         | 1801.8823      | 901.4448         | 17 |
| 3  | 302.1347  | 151.5710        |                |                  | 284.1241       | 142.5657         | S    | 1704.8659 | 852.9366        | 1687.8394      | 844.4233         | 1686.8553      | 843.9313         | 16 |
| 4  | 417.1616  | 209.0844        |                |                  | 399.1510       | 200.0792         | D    | 1617.8339 | 809.4206        | 1600.8073      | 800.9073         | 1599.8233      | 800.4153         | 15 |
| 5  | 530.2457  | 265.6265        |                |                  | 512.2351       | 256.6212         | L    | 1502.8069 | 751.9071        | 1485.7804      | 743.3938         | 1484.7964      | 742.9018         | 14 |
| 6  | 643.3297  | 322.1685        |                |                  | 625.3192       | 313.1632         | L    | 1389.7229 | 695.3651        | 1372.6963      | 686.8518         | 1371.7123      | 686.3598         | 13 |
| 7  | 714.3668  | 357.6871        |                |                  | 696.3563       | 348.6818         | A    | 1276.6388 | 638.8230        | 1259.6123      | 630.3098         | 1258.6282      | 629.8178         | 12 |
| 8  | 827.4509  | 414.2291        |                |                  | 809.4403       | 405.2238         | L    | 1205.6017 | 603.3045        | 1188.5751      | 594.7912         | 1187.5911      | 594.2992         | 11 |
| 9  | 958.4914  | 479.7493        |                |                  | 940.4808       | 470.7441         | M    | 1092.5176 | 546.7625        | 1075.4911      | 538.2492         | 1074.5071      | 537.7572         | 10 |
| 10 | 1059.5391 | 530.2732        |                |                  | 1041.5285      | 521.2679         | T    | 961.4771  | 481.2422        | 944.4506       | 472.7289         | 943.4666       | 472.2369         | 9  |
| 11 | 1116.5605 | 558.7839        |                |                  | 1098.5500      | 549.7786         | G    | 860.4295  | 430.7184        | 843.4029       | 422.2051         | 842.4189       | 421.7131         | 8  |
| 12 | 1272.6868 | 636.8470        | 1255.6603      | 628.3338         | 1254.6762      | 627.8418         | K    | 803.4080  | 402.2076        | 786.3815       | 393.6944         | 785.3974       | 393.2024         | 7  |
| 13 | 1403.7273 | 702.3673        | 1386.7007      | 693.8540         | 1385.7167      | 693.3620         | M    | 647.2817  | 324.1445        | 630.2552       | 315.6312         | 629.2712       | 315.1392         | 6  |

|    |           |          |           |          |           |          |   |          |          |          |          |          |          |   |
|----|-----------|----------|-----------|----------|-----------|----------|---|----------|----------|----------|----------|----------|----------|---|
| 14 | 1517.7702 | 759.3887 | 1500.7437 | 750.8755 | 1499.7596 | 750.3835 | N | 516.2413 | 258.6243 | 499.2147 | 250.1110 | 498.2307 | 249.6190 | 5 |
| 15 | 1614.8230 | 807.9151 | 1597.7964 | 799.4019 | 1596.8124 | 798.9098 | P | 402.1983 | 201.6028 | 385.1718 | 193.0895 | 384.1878 | 192.5975 | 4 |
| 16 | 1742.8816 | 871.9444 | 1725.8550 | 863.4311 | 1724.8710 | 862.9391 | Q | 305.1456 | 153.0764 | 288.1190 | 144.5631 | 287.1350 | 144.0711 | 3 |
| 17 | 1829.9136 | 915.4604 | 1812.8870 | 906.9472 | 1811.9030 | 906.4551 | S | 177.0870 | 89.0471  |          |          | 159.0764 | 80.0418  | 2 |
| 18 |           |          |           |          |           |          | A | 90.0550  | 45.5311  |          |          |          |          | 1 |

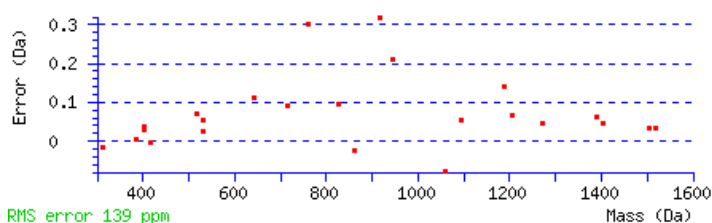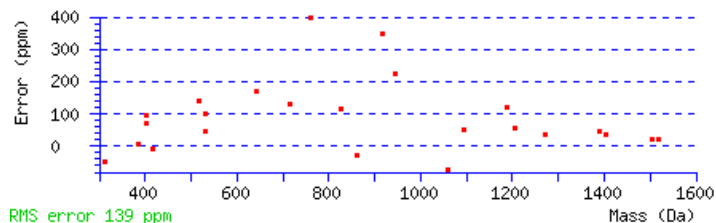

NCBI **BLAST** search of [ADSDLLALMTGKMNPQSA](#)

(Parameters: blastp, nr protein database, expect=20000, no filter, PAM30)

Other BLAST [web gateways](#)

#### All matches to this query

| Score | Mr(calc)  | Delta   | Sequence                              |
|-------|-----------|---------|---------------------------------------|
| 77.8  | 1917.9540 | -0.0026 | <a href="#">ADSDLLALMTGKMNPQSA</a>    |
| 25.6  | 1918.0485 | -0.0971 | <a href="#">MQLSIALDINFESIIDK</a>     |
| 23.2  | 1918.0303 | -0.0789 | <a href="#">PYSYISLITMAIQQAPS</a>     |
| 22.2  | 1918.0138 | -0.0624 | <a href="#">AGGAAAGLSPPAPAPFPLEPG</a> |
| 21.6  | 1917.9694 | -0.0180 | <a href="#">PAGGSGGGLSDSGRNSLTSLP</a> |
| 21.6  | 1918.1900 | -0.2386 | <a href="#">KDLLLLAAELGKMLLER</a>     |
| 20.0  | 1917.9578 | -0.0064 | <a href="#">MEAQLASQSTQRTGKGQ</a>     |
| 19.9  | 1918.0921 | -0.1407 | <a href="#">EAENEKMKAI GARNLL</a>     |
| 19.5  | 1918.1342 | -0.1828 | <a href="#">WRIYRPTTGALLLLTA</a>      |
| 19.3  | 1918.1007 | -0.1494 | <a href="#">VPLVIGCAVSCMALLTLA</a>    |

Mascot: <http://www.matrixscience.com/>

# ADSDLLALMTGKMNPQSA

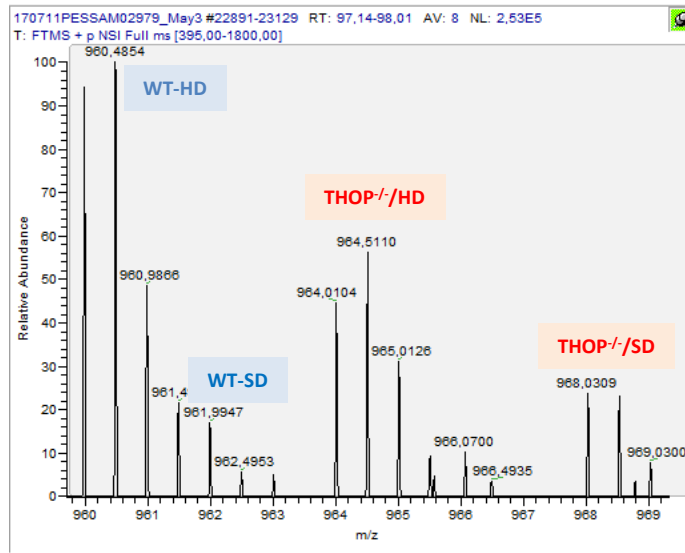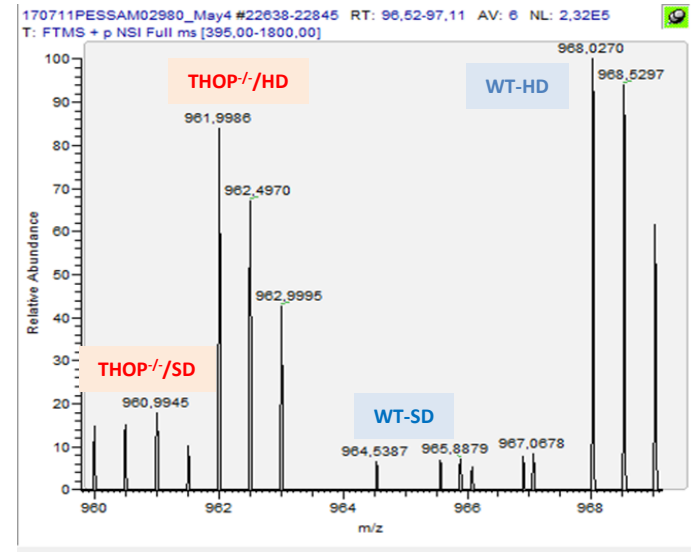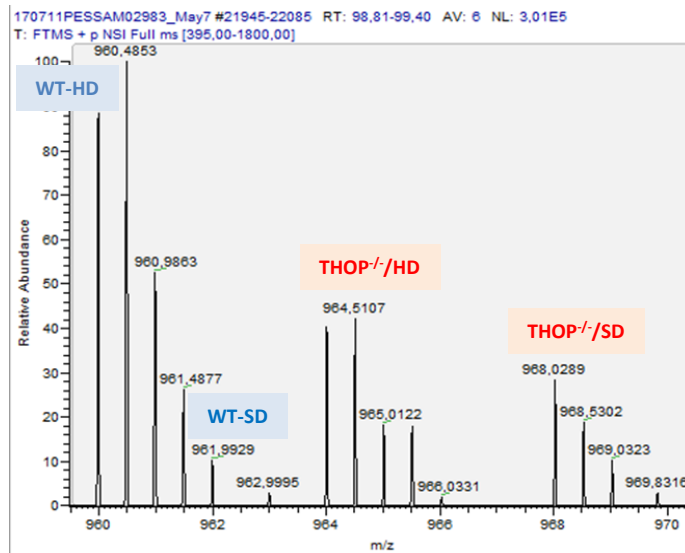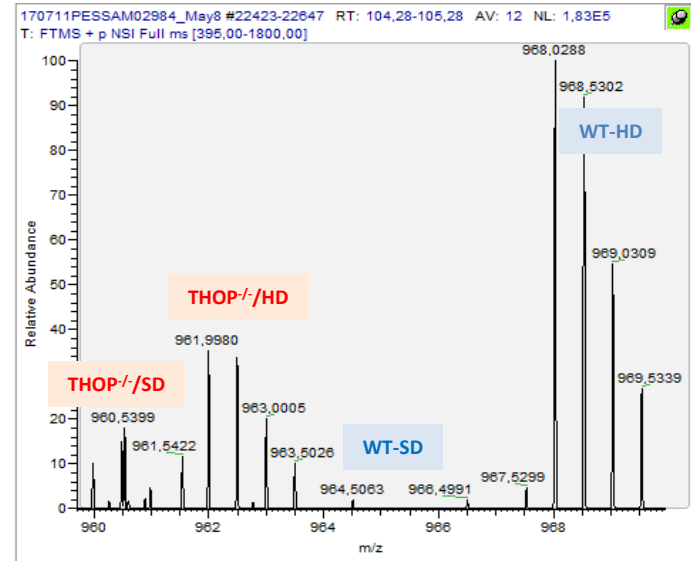

# ADSDLLALMTGKMNPQSA

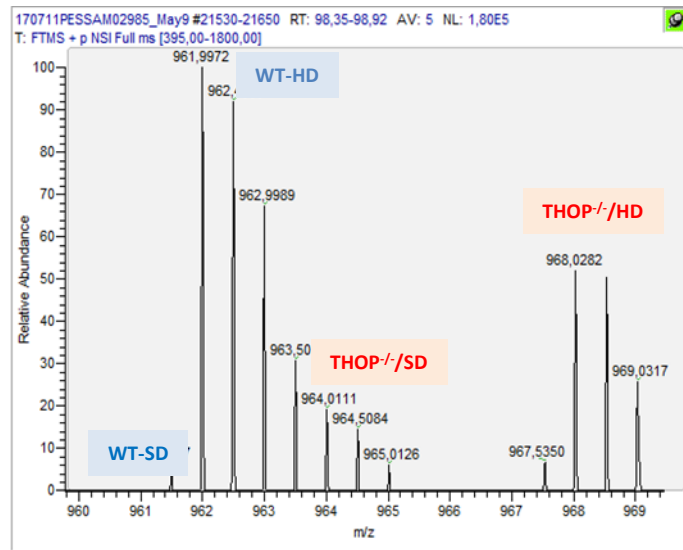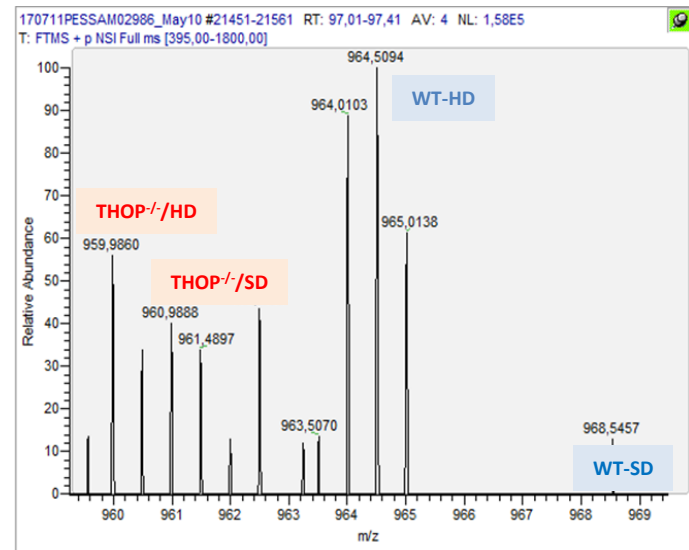



|    |           |          |           |          |           |          |   |          |          |          |          |          |          |   |
|----|-----------|----------|-----------|----------|-----------|----------|---|----------|----------|----------|----------|----------|----------|---|
| 14 | 1538.7672 | 769.8872 | 1521.7406 | 761.3740 | 1520.7566 | 760.8819 | T | 379.2551 | 190.1312 | 362.2286 | 181.6179 | 361.2445 | 181.1259 | 3 |
| 15 | 1639.8149 | 820.4111 | 1622.7883 | 811.8978 | 1621.8043 | 811.4058 | T | 278.2074 | 139.6074 | 261.1809 | 131.0941 | 260.1969 | 130.6021 | 2 |
| 16 |           |          |           |          |           |          | K | 177.1598 | 89.0835  | 160.1332 | 80.5702  |          |          | 1 |

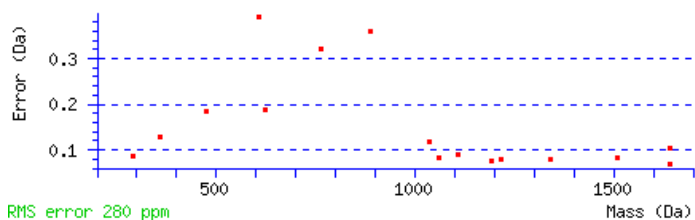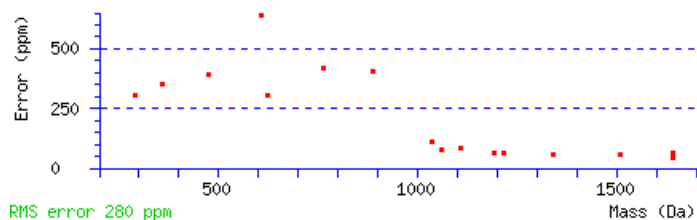

NCBI BLAST search of [GAEALERMFASFPTTK](#)

(Parameters: blastp, nr protein database, expect=20000, no filter, PAM30)

Other BLAST [web gateways](#)

#### All matches to this query

| Score | Mr(calc)  | Delta   | Sequence                           |
|-------|-----------|---------|------------------------------------|
| 52.5  | 1814.9600 | -0.0089 | <a href="#">GAEALERMFASFPTTK</a>   |
| 18.8  | 1814.9854 | -0.0343 | <a href="#">SVPRFSAAAACSNITRL</a>  |
| 17.2  | 1815.1671 | -0.2160 | <a href="#">VKASTCKPFLFLLTK</a>    |
| 14.0  | 1814.8331 | 0.1180  | <a href="#">GMSLGMSATTHYHTYL</a>   |
| 13.1  | 1814.7787 | 0.1724  | <a href="#">NNSAGMAASPEMMGLGDV</a> |
| 13.1  | 1815.0001 | -0.0490 | <a href="#">LIGIYATALSASMSSLIG</a> |
| 12.7  | 1814.8506 | 0.1005  | <a href="#">NVATSESDLSMRTL</a>     |
| 12.4  | 1815.0029 | -0.0518 | <a href="#">KSADFFPGLSAFLSQE</a>   |
| 12.0  | 1815.0103 | -0.0592 | <a href="#">EEFMLPLKQVLEL</a>      |
| 11.4  | 1814.7822 | 0.1690  | <a href="#">AVGYSWPGAFSMADSSP</a>  |

Mascot: <http://www.matrixscience.com/>

# GAEALERMFASFPPTTK

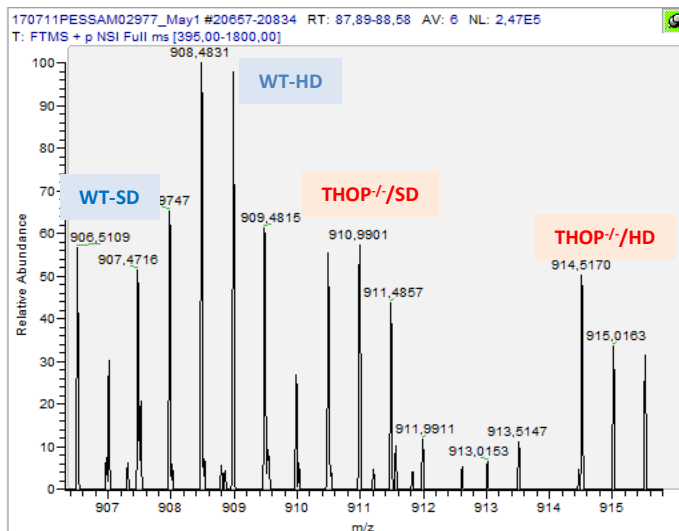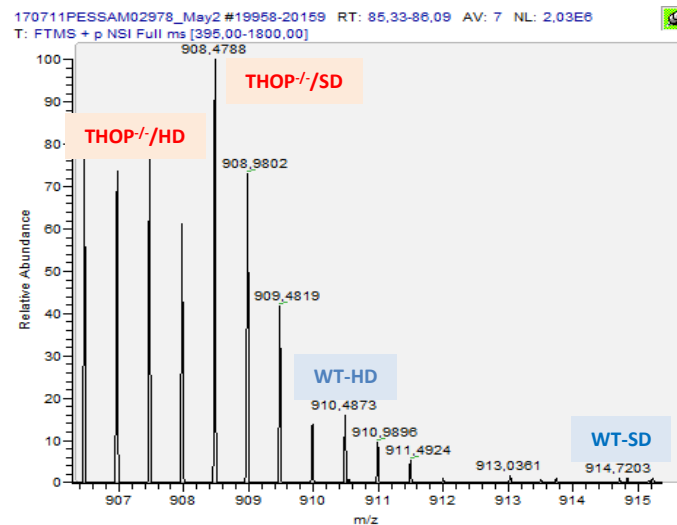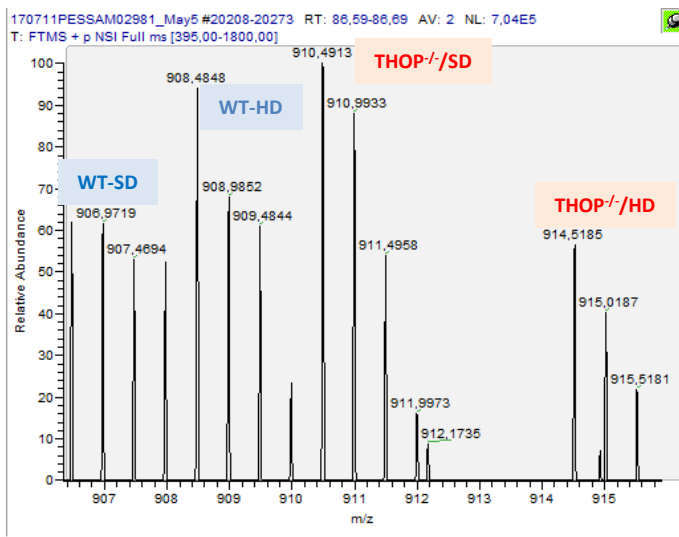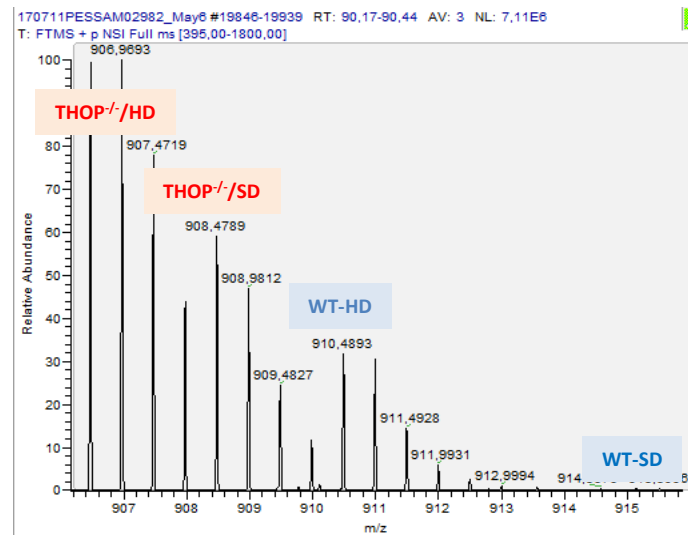

# GAEALERMFASFPTTK

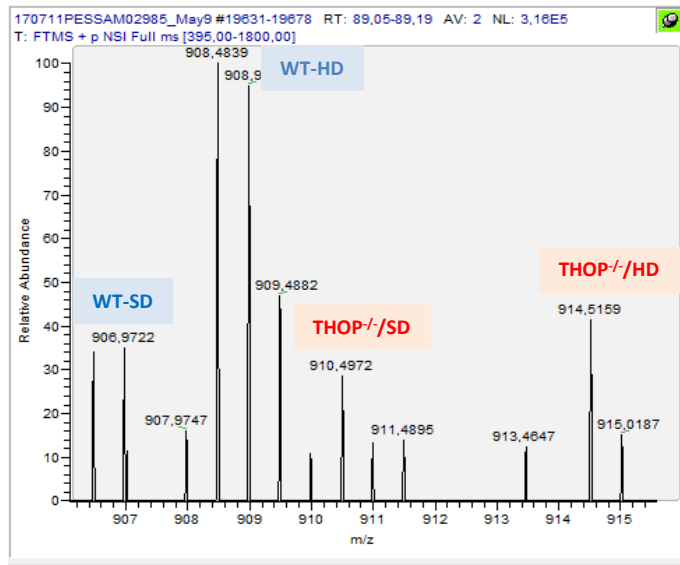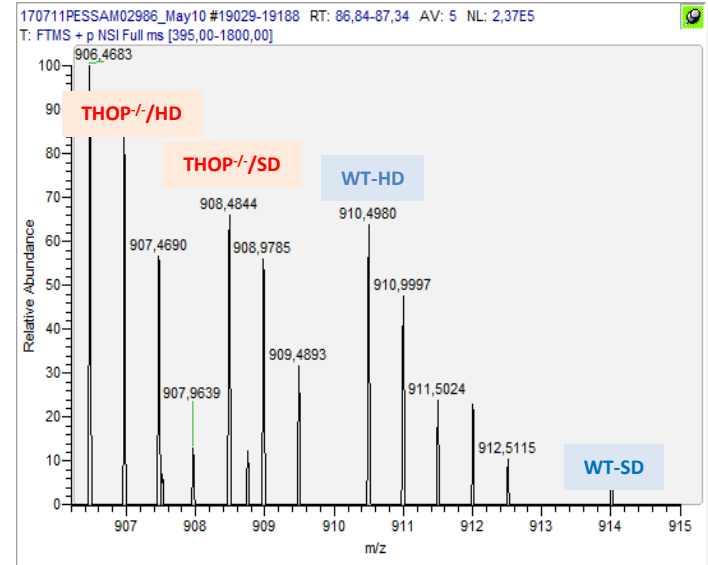



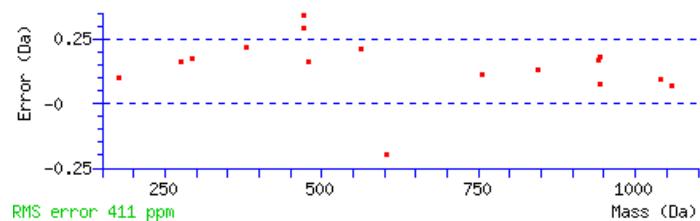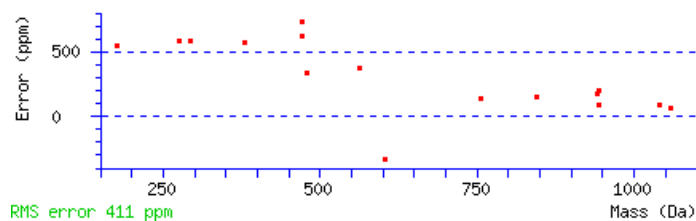

NCBI **BLAST** search of [FDVSHGSAQVK](#)

(Parameters: blastp, nr protein database, expect=20000, no filter, PAM30)

Other BLAST [web gateways](#)

#### All matches to this query

| Score | Mr(calc)  | Delta   | Sequence                      |
|-------|-----------|---------|-------------------------------|
| 50.8  | 1233.6718 | -0.0071 | <a href="#">FDVSHGSAQVK</a>   |
| 28.7  | 1233.6176 | 0.0471  | <a href="#">MDVSEHLPSR</a>    |
| 20.9  | 1233.6241 | 0.0405  | <a href="#">FDVSAPGSGGLTP</a> |
| 17.2  | 1233.6639 | 0.0008  | <a href="#">TPVKMPPSNTS</a>   |
| 16.7  | 1233.7043 | -0.0396 | <a href="#">IGVIFMASPVL</a>   |
| 16.6  | 1233.6791 | -0.0145 | <a href="#">MITSHEPPKT</a>    |
| 16.6  | 1233.5105 | 0.1542  | <a href="#">MTLSTEMSDAS</a>   |
| 15.5  | 1233.6577 | 0.0070  | <a href="#">IMVSAIGNDGPL</a>  |
| 14.7  | 1233.5980 | 0.0667  | <a href="#">VDVSTEAMYAA</a>   |
| 14.4  | 1233.7243 | -0.0596 | <a href="#">CDVSKTLLHL</a>    |

Mascot: <http://www.matrixscience.com/>

# FDVSHGSAQVK

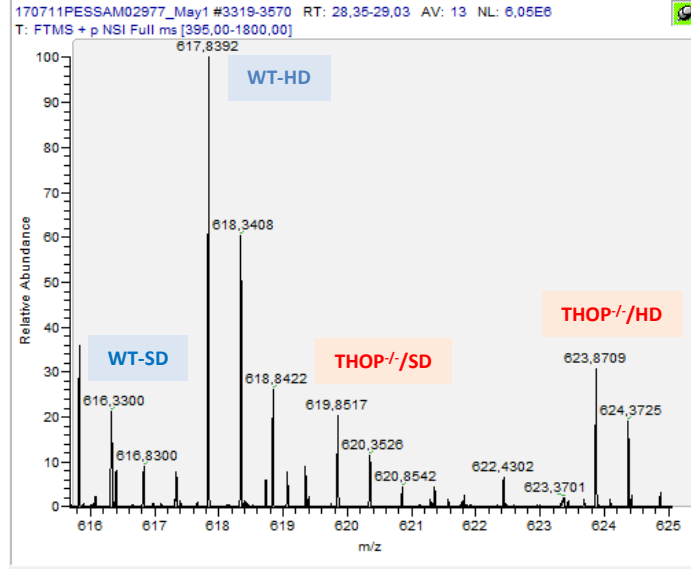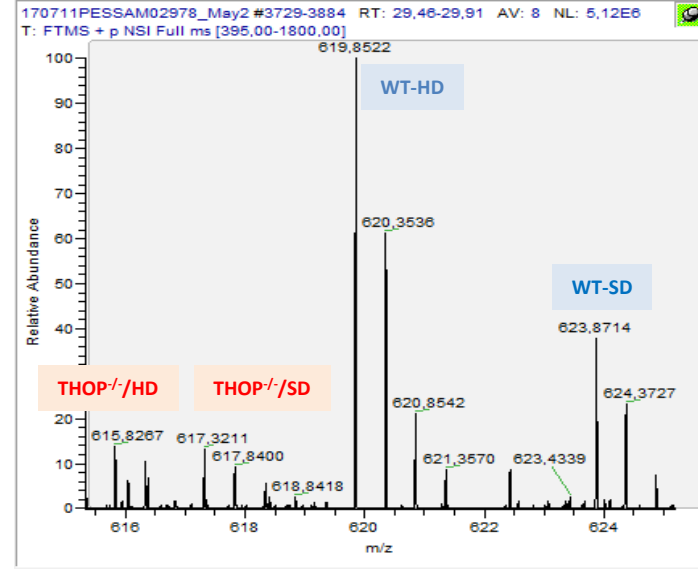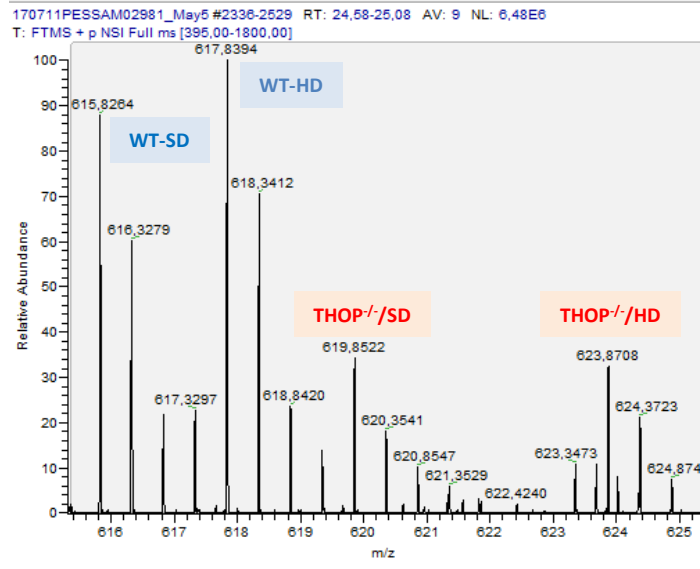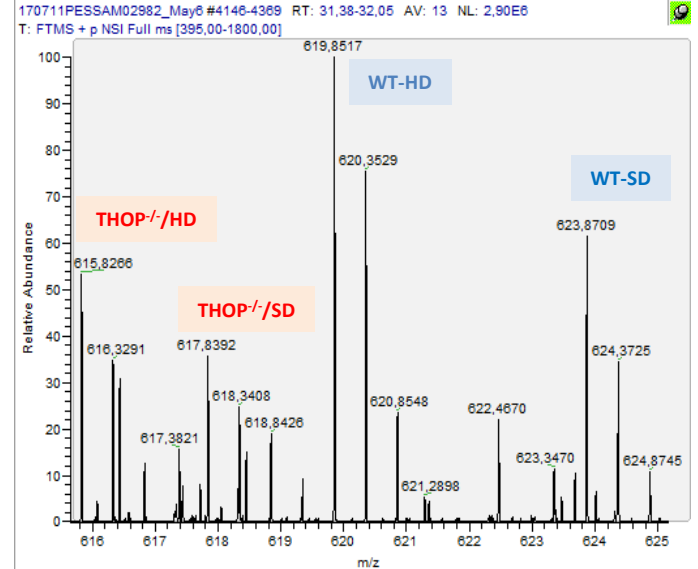

# FDVSHGSAQVK

170711PESSAM02983\_May7 #4188-4288 RT: 30,27-30,53 AV: 7 NL: 8,74E6  
T: FTMS + p NSI Full ms [395,00-1800,00]

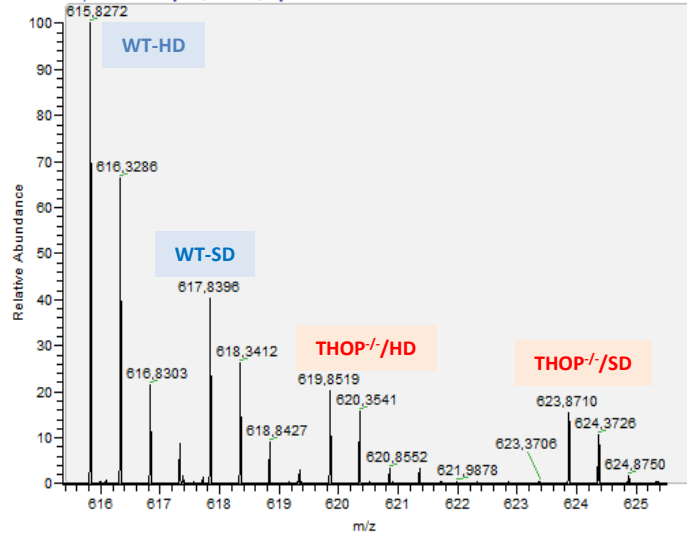

170711PESSAM02984\_May8 #4209-4398 RT: 31,29-31,89 AV: 14 NL: 5,66E6  
T: FTMS + p NSI Full ms [395,00-1800,00]

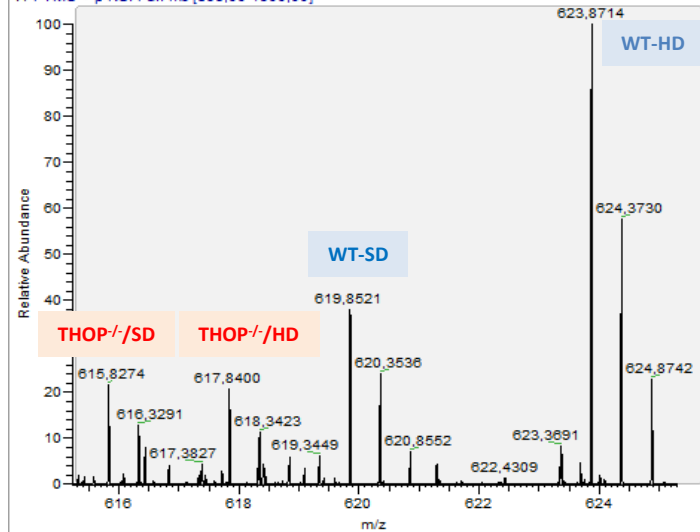



|    |           |          |           |          |   |          |          |          |          |          |          |   |
|----|-----------|----------|-----------|----------|---|----------|----------|----------|----------|----------|----------|---|
| 9  | 870.4104  | 435.7089 | 852.3999  | 426.7036 | G | 745.3839 | 373.1956 | 728.3573 | 364.6823 | 727.3733 | 364.1903 | 7 |
| 10 | 941.4476  | 471.2274 | 923.4370  | 462.2221 | A | 688.3624 | 344.6849 | 671.3359 | 336.1716 | 670.3519 | 335.6796 | 6 |
| 11 | 1070.4902 | 535.7487 | 1052.4796 | 526.7434 | E | 617.3253 | 309.1663 | 600.2988 | 300.6530 | 599.3148 | 300.1610 | 5 |
| 12 | 1141.5273 | 571.2673 | 1123.5167 | 562.2620 | A | 488.2827 | 244.6450 | 471.2562 | 236.1317 | 470.2722 | 235.6397 | 4 |
| 13 | 1254.6113 | 627.8093 | 1236.6008 | 618.8040 | L | 417.2456 | 209.1264 | 400.2191 | 200.6132 | 399.2350 | 200.1212 | 3 |
| 14 | 1383.6539 | 692.3306 | 1365.6434 | 683.3253 | E | 304.1615 | 152.5844 | 287.1350 | 144.0711 | 286.1510 | 143.5791 | 2 |
| 15 |           |          |           |          | R | 175.1190 | 88.0631  | 158.0924 | 79.5498  |          |          | 1 |

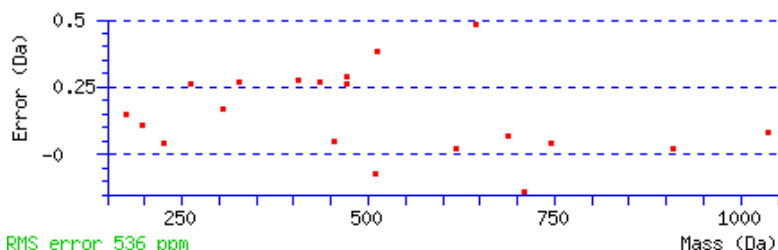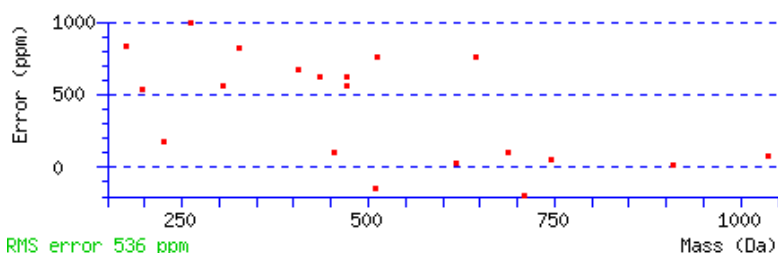

NCBI BLAST search of [IGGHGAEYGAELER](#)

(Parameters: blastp, nr protein database, expect=20000, no filter, PAM30)

Other BLAST [web gateways](#)

#### All matches to this query

| Score | Mr(calc)  | Delta   | Sequence                        |
|-------|-----------|---------|---------------------------------|
| 44.5  | 1556.7583 | 0.0010  | <a href="#">IGGHGAEYGAELER</a>  |
| 20.4  | 1556.8708 | -0.1115 | <a href="#">AYIHEKGMHRD</a>     |
| 18.9  | 1556.8218 | -0.0625 | <a href="#">ELEAEKAGTVSMY</a>   |
| 17.4  | 1556.7028 | 0.0565  | <a href="#">EMGDEYVERAVT</a>    |
| 17.4  | 1556.8546 | -0.0953 | <a href="#">LPMMEYIPEKRA</a>    |
| 17.4  | 1556.8546 | -0.0953 | <a href="#">LPMMEYIPEKRA</a>    |
| 16.8  | 1556.9713 | -0.2120 | <a href="#">SAKGAERVITLKM</a>   |
| 16.6  | 1556.9054 | -0.1461 | <a href="#">DLPYEYLKPSRI</a>    |
| 15.3  | 1556.8675 | -0.1082 | <a href="#">KGNGGEHGPPGPPGP</a> |
| 14.6  | 1556.8596 | -0.1003 | <a href="#">IAGLNMLSAISIER</a>  |

Mascot: <http://www.matrixscience.com/>

# IGGHGAEYGAELER

170711PESSAM02977\_May1 #6988-7471 RT: 39,51-41,00 AV: 28 NL: 1,18E6  
T: FTMS + p NSI Full ms [395,00-1800,00]

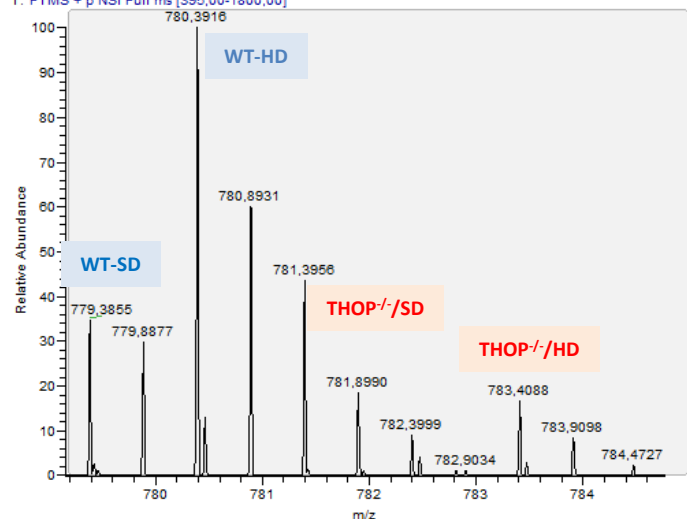

170711PESSAM02978\_May2 #6980-7148 RT: 40,01-40,52 AV: 9 NL: 1,53E6  
T: FTMS + p NSI Full ms [395,00-1800,00]

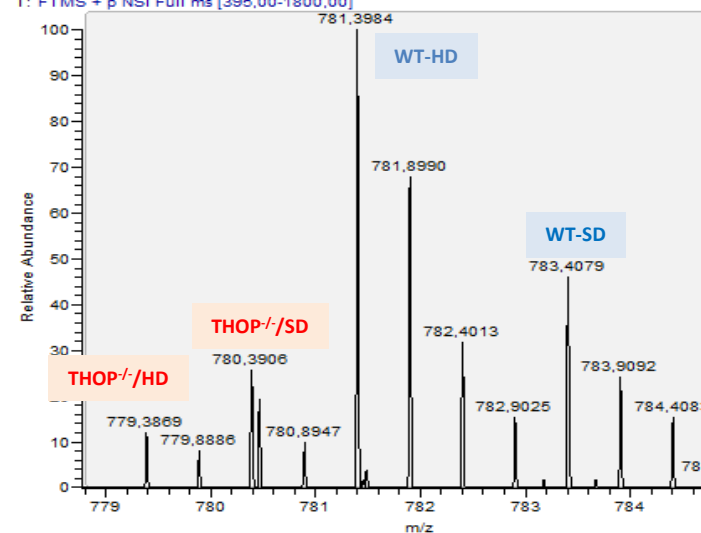

170711PESSAM02979\_May3 #6434-6533 RT: 38,60-38,80 AV: 4 NL: 1,17E6  
T: FTMS + p NSI Full ms [395,00-1800,00]

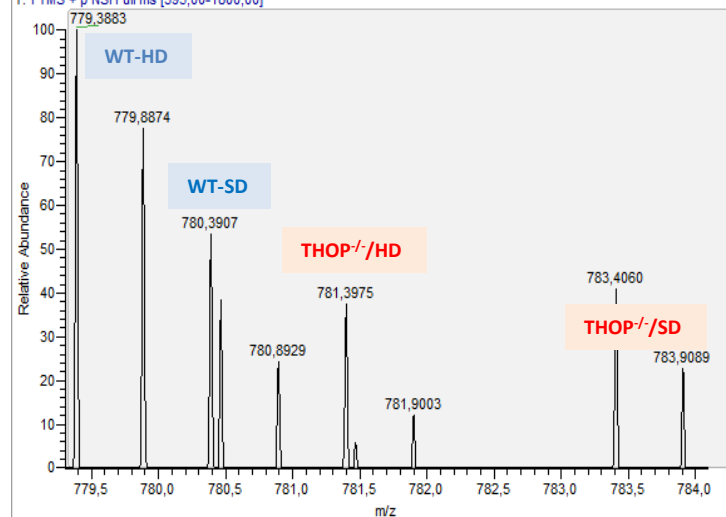

170711PESSAM02980\_May4 #6592-6767 RT: 38,42-38,92 AV: 10 NL: 3,08E6  
T: FTMS + p NSI Full ms [395,00-1800,00]

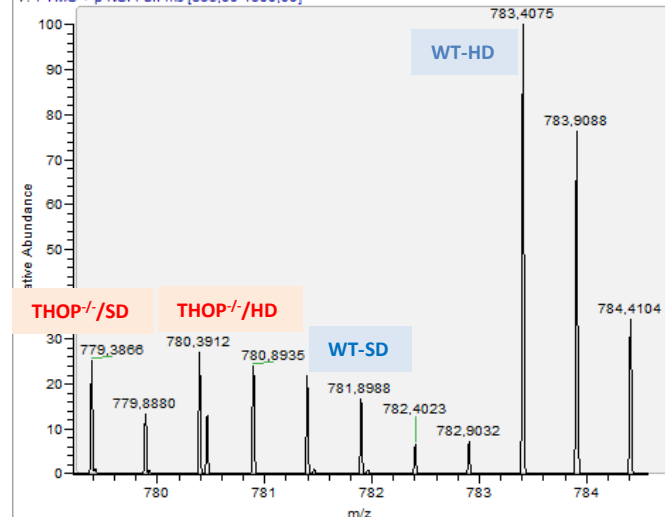

# IGGHGAEYGAELER

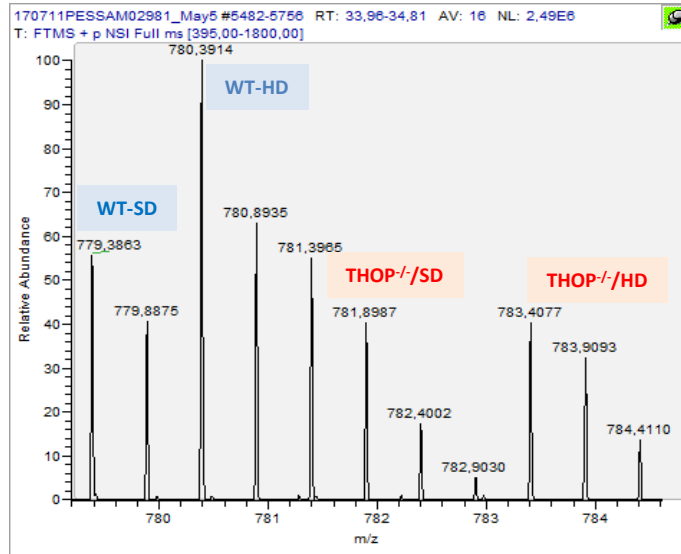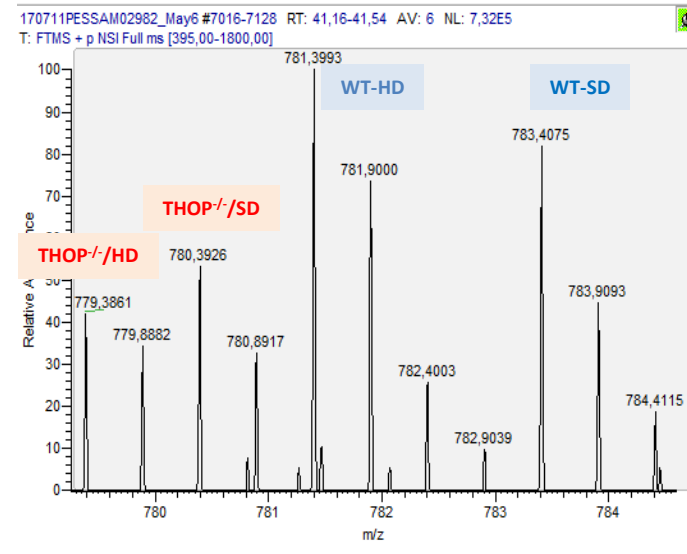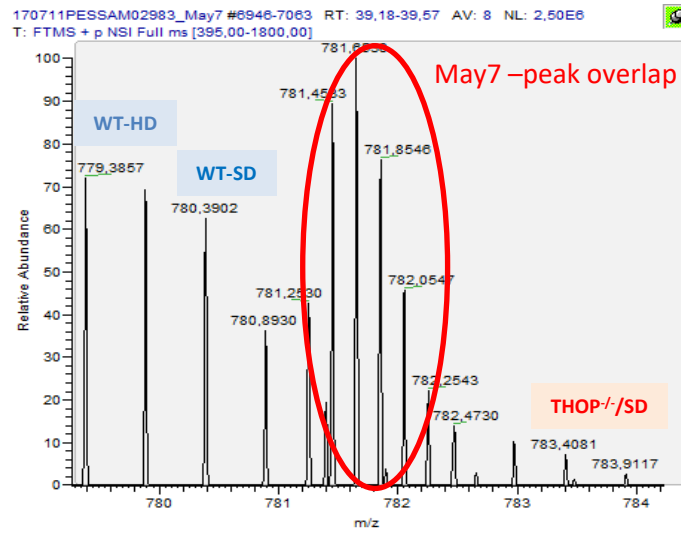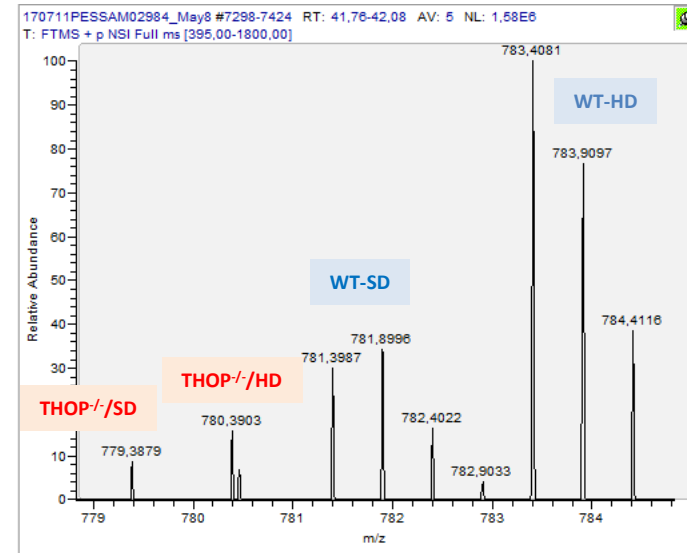

# Mascot Search Results

## Peptide View

MS/MS Fragmentation of **SVSTVLTSK**

Found in **HBA\_MOUSE** in **SwissProt**, Hemoglobin subunit alpha OS=Mus musculus GN=Hba PE=1 SV=2

Match to Query 2839: 992.668188 from(497.341370,2+) intensity(14296911.0000) scans(5675) rawscans(sn5675)  
rtinseconds(2123.5117) index(3301)

Title: 3302: Scan 5675 (rt=2123.51) [D:\Users\Mayara - HMS Fusion data\170711PESSAM02977\_May1.raw]

Data file 170711PESSAM02977\_May1.temp.mgf

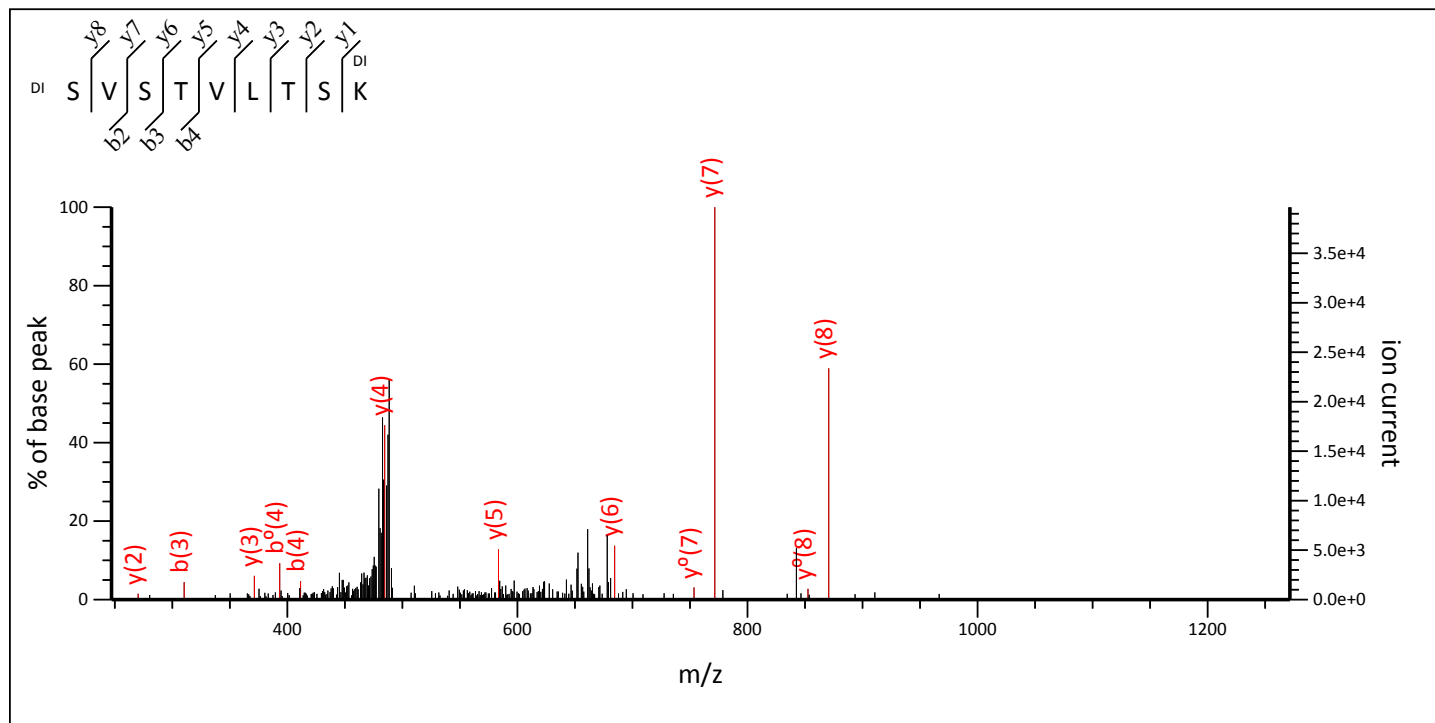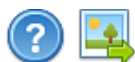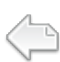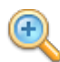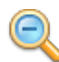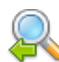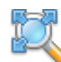

247.13

to 1271.51

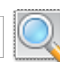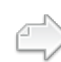

Label all possible matches ☐ Label matches used for scoring ☒

Monoisotopic mass of neutral peptide Mr(calc): 992.6692

Variable modifications:

N-term : Dimethyl:2H(6)13C(2) (N-term)

K9 : Dimethyl:2H(6)13C(2) (K)

Ions Score: 62 Expect: 0.023

Matches : 14/78 fragment ions using 25 most intense peaks ([help](#))

| # | b        | b <sup>++</sup> | b <sup>0</sup> | b <sup>0++</sup> | Seq. | y        | y <sup>++</sup> | y*       | y <sup>*++</sup> | y <sup>0</sup> | y <sup>0++</sup> | # |
|---|----------|-----------------|----------------|------------------|------|----------|-----------------|----------|------------------|----------------|------------------|---|
| 1 | 124.1150 | 62.5611         | 106.1044       | 53.5558          | S    |          |                 |          |                  |                |                  | 9 |
| 2 | 223.1834 | 112.0953        | 205.1728       | 103.0900         | V    | 870.5688 | 435.7880        | 853.5422 | 427.2748         | 852.5582       | 426.7827         | 8 |
| 3 | 310.2154 | 155.6113        | 292.2049       | 146.6061         | S    | 771.5004 | 386.2538        | 754.4738 | 377.7405         | 753.4898       | 377.2485         | 7 |
| 4 | 411.2631 | 206.1352        | 393.2525       | 197.1299         | T    | 684.4683 | 342.7378        | 667.4418 | 334.2245         | 666.4578       | 333.7325         | 6 |
| 5 | 510.3315 | 255.6694        | 492.3209       | 246.6641         | V    | 583.4207 | 292.2140        | 566.3941 | 283.7007         | 565.4101       | 283.2087         | 5 |
| 6 | 623.4156 | 312.2114        | 605.4050       | 303.2061         | L    | 484.3522 | 242.6798        | 467.3257 | 234.1665         | 466.3417       | 233.6745         | 4 |
| 7 | 724.4633 | 362.7353        | 706.4527       | 353.7300         | T    | 371.2682 | 186.1377        | 354.2416 | 177.6245         | 353.2576       | 177.1324         | 3 |
| 8 | 811.4953 | 406.2513        | 793.4847       | 397.2460         | S    | 270.2205 | 135.6139        | 253.1940 | 127.1006         | 252.2099       | 126.6086         | 2 |

|   |  |  |  |  |   |          |         |          |         |  |  |   |
|---|--|--|--|--|---|----------|---------|----------|---------|--|--|---|
| 9 |  |  |  |  | K | 183.1885 | 92.0979 | 166.1619 | 83.5846 |  |  | 1 |
|---|--|--|--|--|---|----------|---------|----------|---------|--|--|---|

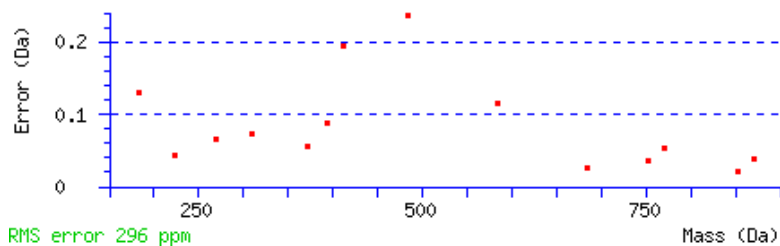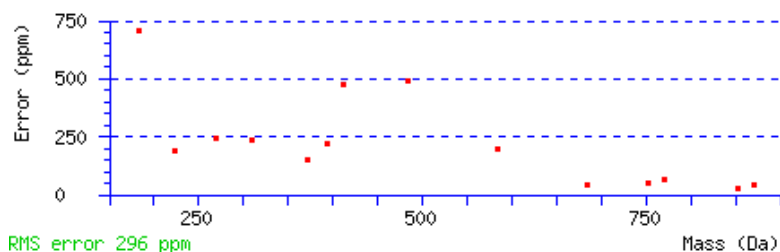

NCBI **BLAST** search of [SVSTVLTSK](#)

(Parameters: blastp, nr protein database, expect=20000, no filter, PAM30)

Other BLAST [web gateways](#)

#### All matches to this query

| Score | Mr(calc) | Delta   | Sequence                   |
|-------|----------|---------|----------------------------|
| 62.2  | 992.6692 | -0.0010 | <a href="#">SVSTVLTSK</a>  |
| 44.8  | 992.6328 | 0.0354  | <a href="#">GSSTVITSK</a>  |
| 26.9  | 992.5030 | 0.1652  | <a href="#">SVSSFAVGGM</a> |
| 26.2  | 992.5179 | 0.1503  | <a href="#">INDLLSFG</a>   |
| 25.4  | 992.5787 | 0.0895  | <a href="#">SVSSPMADK</a>  |
| 24.6  | 992.5360 | 0.1321  | <a href="#">SVVAGFSSGF</a> |
| 23.6  | 992.4485 | 0.2197  | <a href="#">PGDLSVSSTC</a> |
| 23.2  | 992.4848 | 0.1833  | <a href="#">DNLLVTSMG</a>  |
| 22.8  | 992.5212 | 0.1469  | <a href="#">VAKSVTSGM</a>  |
| 21.7  | 992.5787 | 0.0895  | <a href="#">SVGMGDVEK</a>  |

Mascot: <http://www.matrixscience.com/>

# SVSTVLTSK

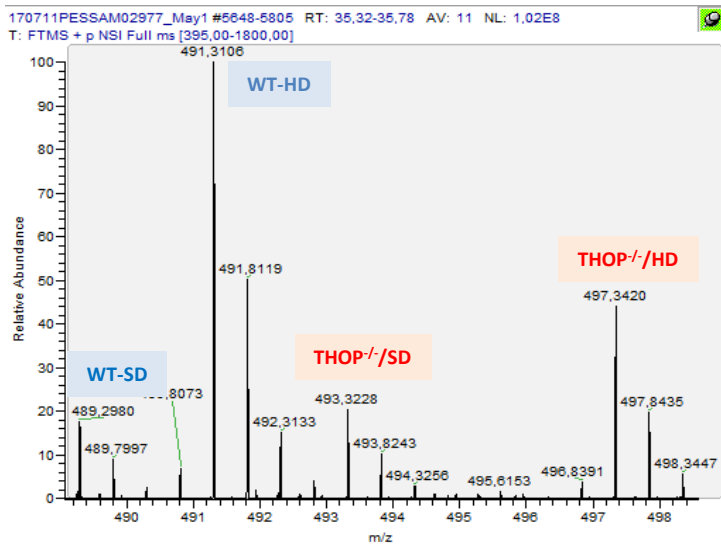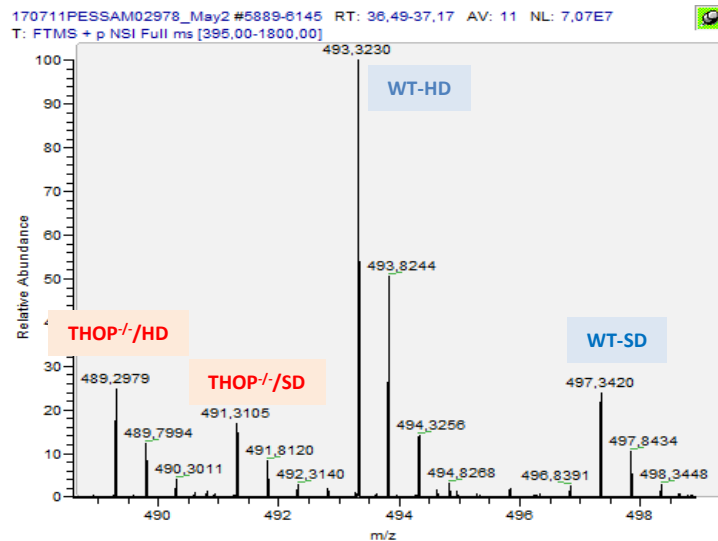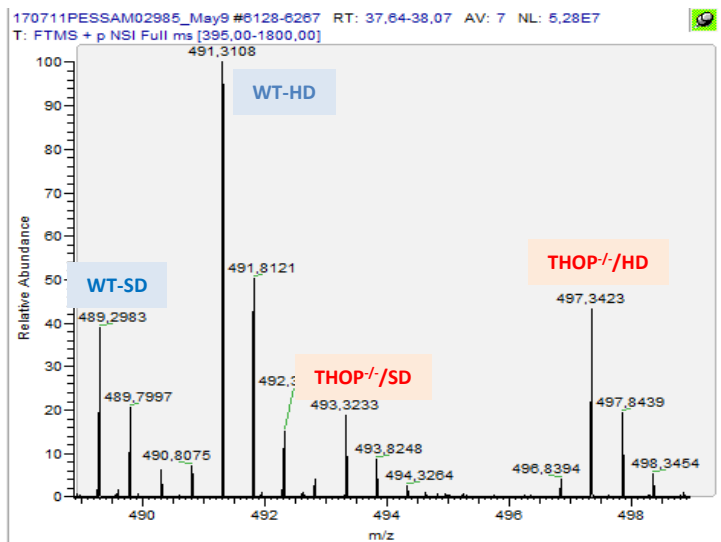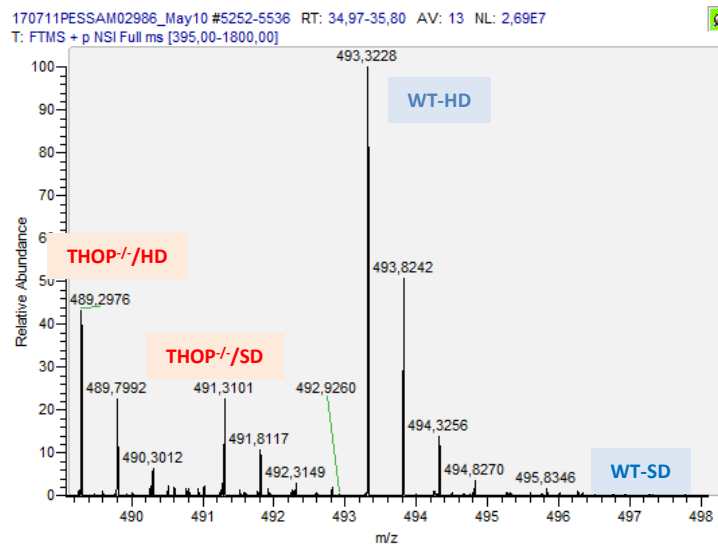

# SVSTVLTSK

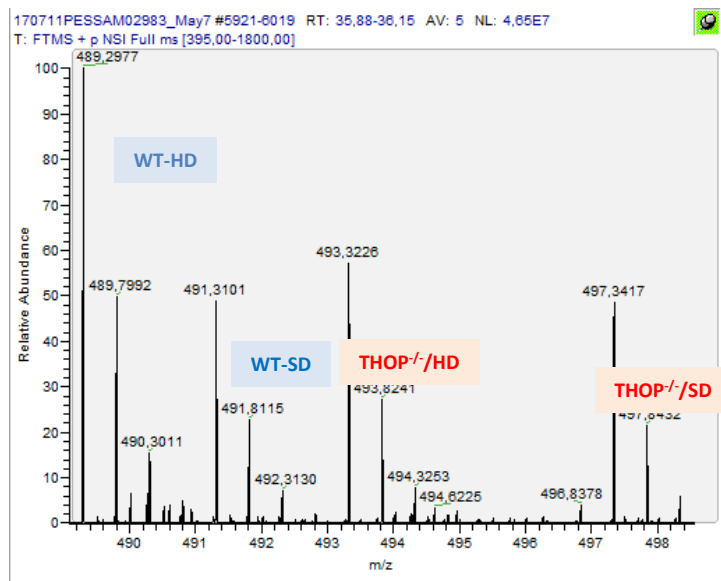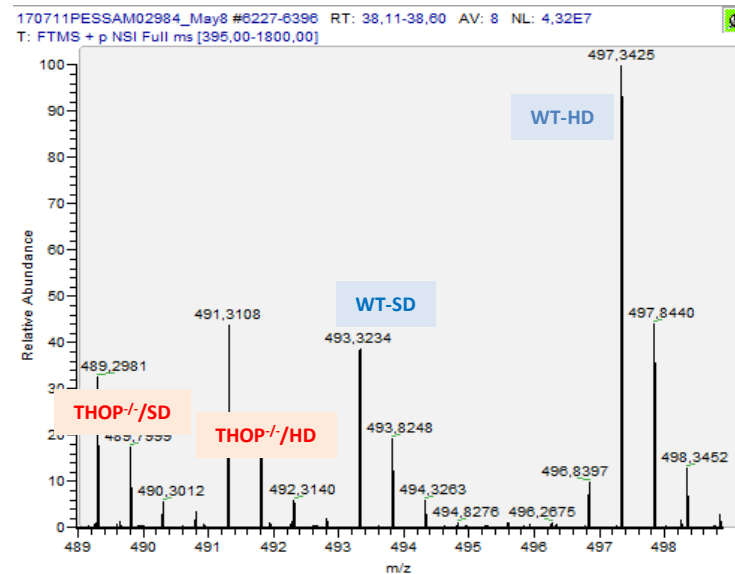

# Mascot Search Results

## Peptide View

MS/MS Fragmentation of **QATVGDVNTDRPGLLDLKGK**

Found in **ACBP\_MOUSE** in **SwissProt**, Acyl-CoA-binding protein OS=Mus musculus GN=Dbi PE=1 SV=2

Match to Query 17147: 2186.250912 from(729.757580,3+) intensity(10054624.0000) scans(12874) rawscans(sn12874) rtinseconds(3491.9313) index(8013)

Title: 8014: Scan 12874 (rt=3491.93) [D:\Users\Mayara - HMS Fusion data\170711PESSAM02977\_May1.raw]

Data file 170711PESSAM02977\_May1.temp.mgf

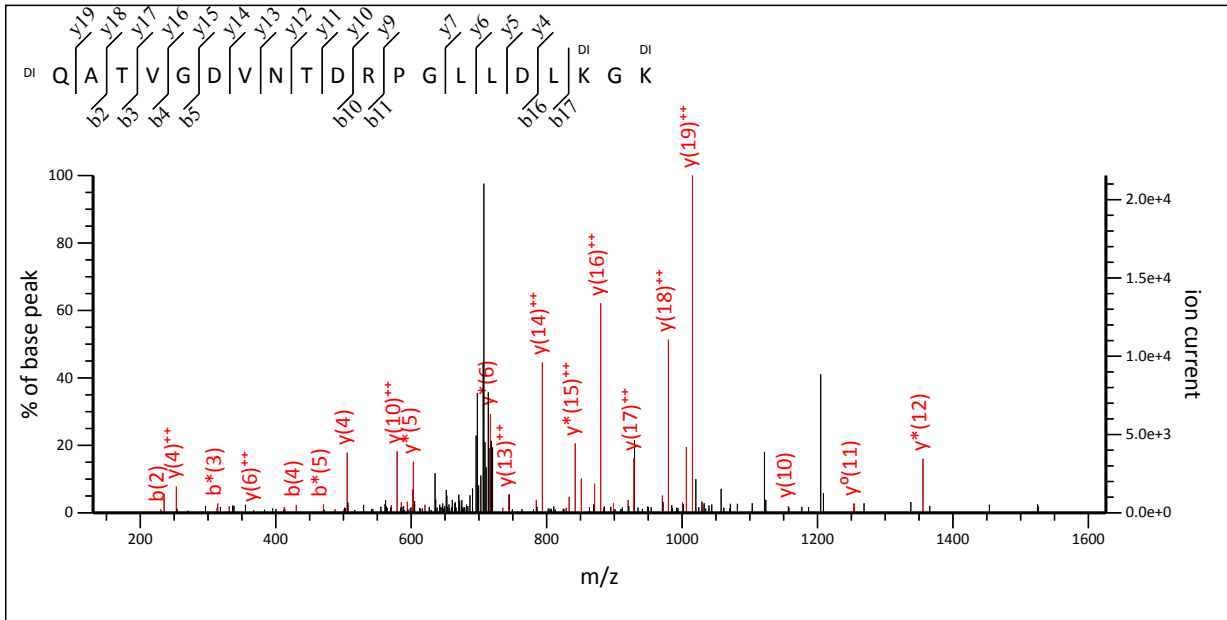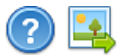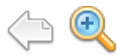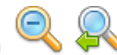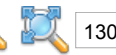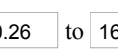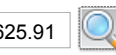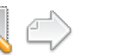

Label all possible matches ☐ Label matches used for scoring ☒

Monoisotopic mass of neutral peptide Mr(calc): 2186.2634

Variable modifications:

N-term : Dimethyl:2H(2) (N-term)

K18 : Dimethyl:2H(2) (K)

K20 : Dimethyl:2H(2) (K)

Ions Score: 41 Expect: 0.0066

Matches : 63/216 fragment ions using 104 most intense peaks ([help](#))

| #  | b         | b <sup>++</sup> | b <sup>*</sup> | b <sup>+++</sup> | b <sup>0</sup> | b <sup>0++</sup> | Seq. | y         | y <sup>++</sup> | y <sup>*</sup> | y <sup>+++</sup> | y <sup>0</sup> | y <sup>0++</sup> | #  |
|----|-----------|-----------------|----------------|------------------|----------------|------------------|------|-----------|-----------------|----------------|------------------|----------------|------------------|----|
| 1  | 159.1128  | 80.0600         | 142.0863       | 71.5468          |                |                  | Q    |           |                 |                |                  |                |                  | 20 |
| 2  | 230.1499  | 115.5786        | 213.1234       | 107.0653         |                |                  | A    | 2029.1652 | 1015.0862       | 2012.1386      | 1006.5730        | 2011.1546      | 1006.0809        | 19 |
| 3  | 331.1976  | 166.1024        | 314.1710       | 157.5892         | 313.1870       | 157.0972         | T    | 1958.1281 | 979.5677        | 1941.1015      | 971.0544         | 1940.1175      | 970.5624         | 18 |
| 4  | 430.2660  | 215.6366        | 413.2395       | 207.1234         | 412.2554       | 206.6314         | V    | 1857.0804 | 929.0438        | 1840.0538      | 920.5306         | 1839.0698      | 920.0385         | 17 |
| 5  | 487.2875  | 244.1474        | 470.2609       | 235.6341         | 469.2769       | 235.1421         | G    | 1758.0120 | 879.5096        | 1740.9854      | 870.9964         | 1740.0014      | 870.5043         | 16 |
| 6  | 602.3144  | 301.6608        | 585.2879       | 293.1476         | 584.3039       | 292.6556         | D    | 1700.9905 | 850.9989        | 1683.9640      | 842.4856         | 1682.9799      | 841.9936         | 15 |
| 7  | 701.3828  | 351.1951        | 684.3563       | 342.6818         | 683.3723       | 342.1898         | V    | 1585.9636 | 793.4854        | 1568.9370      | 784.9721         | 1567.9530      | 784.4801         | 14 |
| 8  | 815.4258  | 408.2165        | 798.3992       | 399.7032         | 797.4152       | 399.2112         | N    | 1486.8952 | 743.9512        | 1469.8686      | 735.4379         | 1468.8846      | 734.9459         | 13 |
| 9  | 916.4734  | 458.7404        | 899.4469       | 450.2271         | 898.4629       | 449.7351         | T    | 1372.8522 | 686.9298        | 1355.8257      | 678.4165         | 1354.8417      | 677.9245         | 12 |
| 10 | 1031.5004 | 516.2538        | 1014.4738      | 507.7406         | 1013.4898      | 507.2485         | D    | 1271.8045 | 636.4059        | 1254.7780      | 627.8926         | 1253.7940      | 627.4006         | 11 |
| 11 | 1187.6015 | 594.3044        | 1170.5749      | 585.7911         | 1169.5909      | 585.2991         | R    | 1156.7776 | 578.8924        | 1139.7511      | 570.3792         | 1138.7670      | 569.8872         | 10 |
| 12 | 1284.6543 | 642.8308        | 1267.6277      | 634.3175         | 1266.6437      | 633.8255         | P    | 1000.6765 | 500.8419        | 983.6499       | 492.3286         | 982.6659       | 491.8366         | 9  |
| 13 | 1341.6757 | 671.3415        | 1324.6492      | 662.8282         | 1323.6652      | 662.3362         | G    | 903.6237  | 452.3155        | 886.5972       | 443.8022         | 885.6132       | 443.3102         | 8  |
| 14 | 1454.7598 | 727.8835        | 1437.7332      | 719.3703         | 1436.7492      | 718.8782         | L    | 846.6023  | 423.8048        | 829.5757       | 415.2915         | 828.5917       | 414.7995         | 7  |
| 15 | 1567.8438 | 784.4256        | 1550.8173      | 775.9123         | 1549.8333      | 775.4203         | L    | 733.5182  | 367.2627        | 716.4917       | 358.7495         | 715.5076       | 358.2575         | 6  |

|    |           |           |           |          |           |          |   |          |          |          |          |          |          |   |
|----|-----------|-----------|-----------|----------|-----------|----------|---|----------|----------|----------|----------|----------|----------|---|
| 16 | 1682.8708 | 841.9390  | 1665.8442 | 833.4258 | 1664.8602 | 832.9338 | D | 620.4341 | 310.7207 | 603.4076 | 302.2074 | 602.4236 | 301.7154 | 5 |
| 17 | 1795.9549 | 898.4811  | 1778.9283 | 889.9678 | 1777.9443 | 889.4758 | L | 505.4072 | 253.2072 | 488.3806 | 244.6940 |          |          | 4 |
| 18 | 1954.0968 | 977.5520  | 1937.0702 | 969.0387 | 1936.0862 | 968.5467 | K | 392.3231 | 196.6652 | 375.2966 | 188.1519 |          |          | 3 |
| 19 | 2011.1182 | 1006.0628 | 1994.0917 | 997.5495 | 1993.1077 | 997.0575 | G | 234.1812 | 117.5942 | 217.1547 | 109.0810 |          |          | 2 |
| 20 |           |           |           |          |           |          | K | 177.1598 | 89.0835  | 160.1332 | 80.5702  |          |          | 1 |

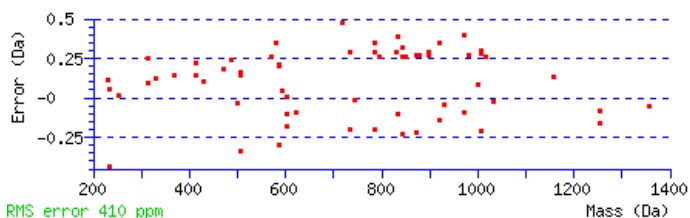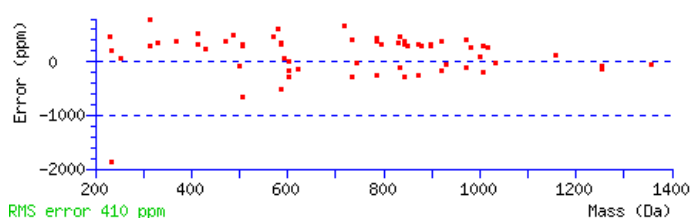

NCBI BLAST search of [QATVGDVNTDRPGLLDLKGK](#)

(Parameters: blastp, nr protein database, expect=20000, no filter, PAM30)

Other BLAST [web gateways](#)

#### All matches to this query

| Score | Mr(calc)  | Delta   | Sequence                               |
|-------|-----------|---------|----------------------------------------|
| 41.4  | 2186.2634 | -0.0125 | <a href="#">QATVGDVNTDRPGLLDLKGK</a>   |
| 17.4  | 2186.1636 | 0.0873  | <a href="#">APRKPPSSELLESRDHYA</a>     |
| 15.9  | 2186.0460 | 0.2049  | <a href="#">ANDVGMIQTAHVGVGISGNEGM</a> |
| 15.7  | 2186.1623 | 0.0886  | <a href="#">SATDRKIIIFQVIDYVSAY</a>    |
| 14.2  | 2186.0416 | 0.2093  | <a href="#">YSTPSPATIETQSSSSEEIV</a>   |
| 13.0  | 2186.0678 | 0.1831  | <a href="#">QATVGNYSYKCNTEEHIEVS</a>   |
| 12.9  | 2186.1486 | 0.1023  | <a href="#">YVVFLKLFLETAEQHEM</a>      |
| 12.5  | 2186.1261 | 0.1248  | <a href="#">PPAGDDGSGSRPQRLLWQTA</a>   |
| 11.7  | 2186.0060 | 0.2449  | <a href="#">SNGNRRHSEDESLGSSGRV</a>    |
| 11.3  | 2186.1253 | 0.1256  | <a href="#">VTPVPGQTLVTMATATVTANNG</a> |

Mascot: <http://www.matrixscience.com/>

# QATVGDVNTDRPGLLDLKGG

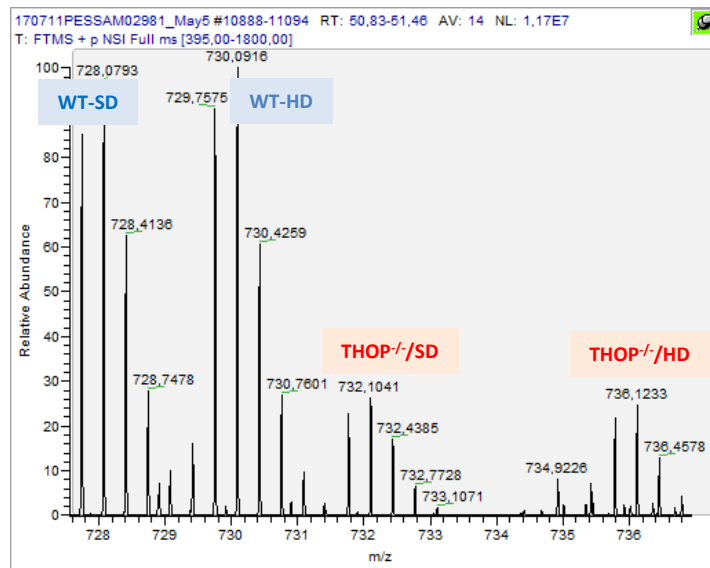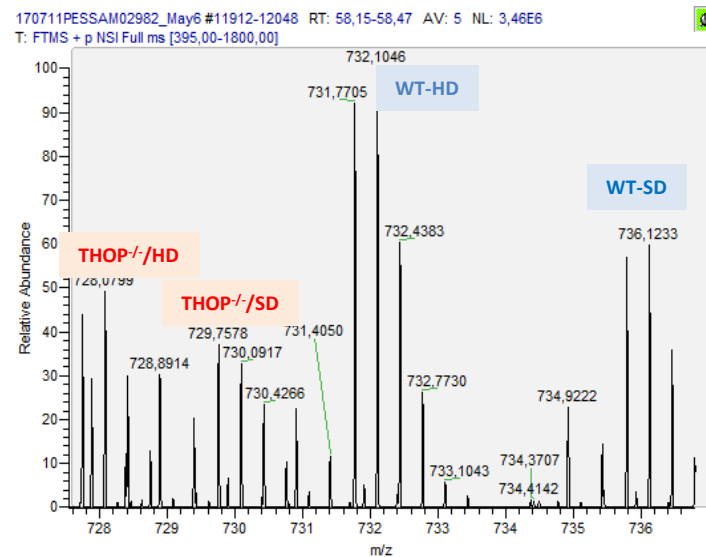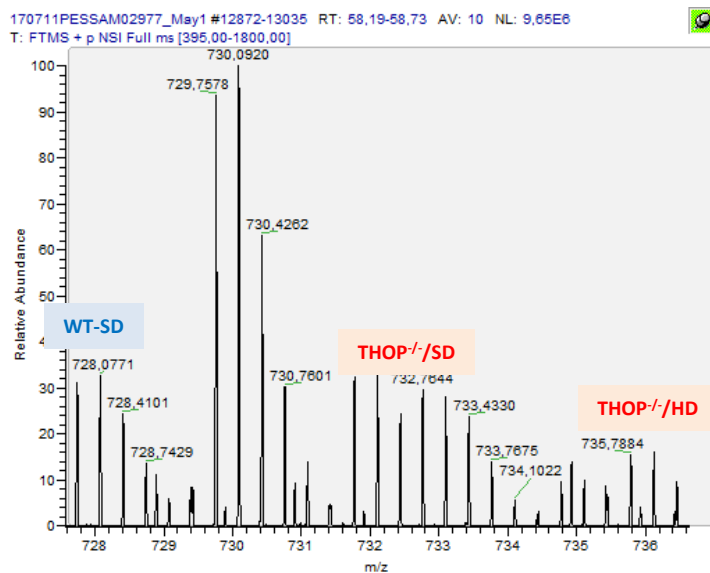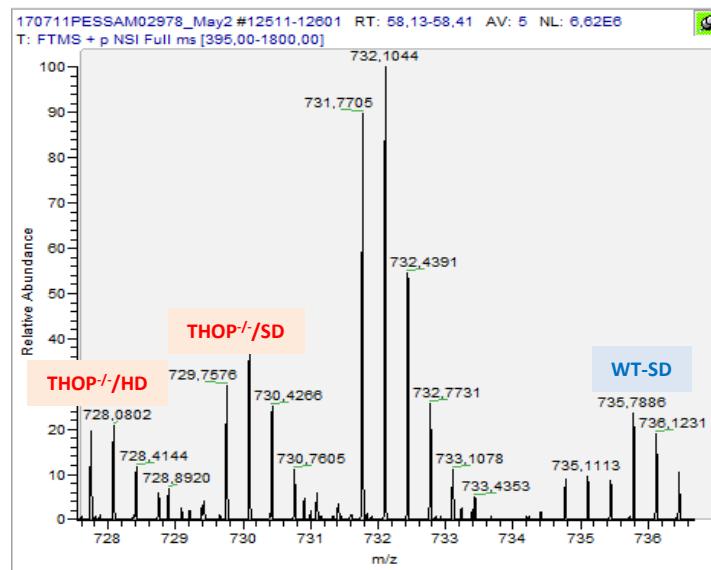

QATVGDVNTDRPGLLDLKGG

May7 –not found

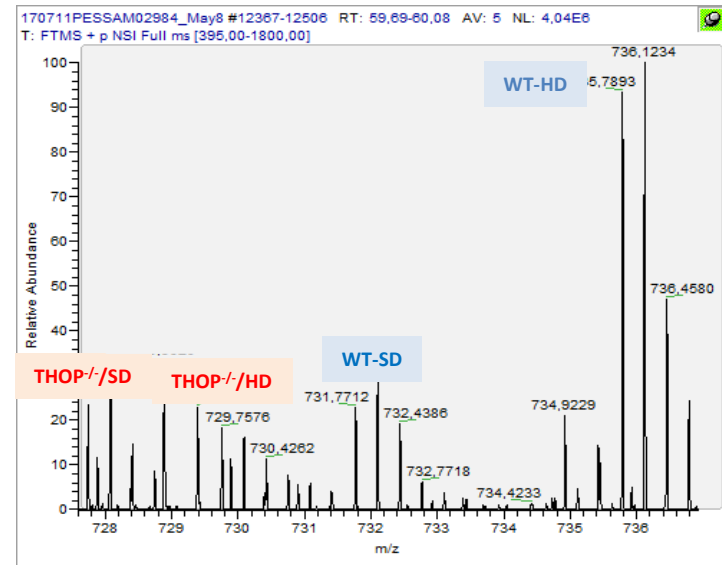

Supplement: s1 [file s1]
