# Supplementary material for: The Relevance of Thimet Oligopeptidase in the Regulation of Energy Metabolism and Diet-Induced Obesity
Source: MDPI journal article supplement (doi:10.3390/biom10020321), 2020-02-17
Supplement: s1 [file s1]

**Supplemental Table S1.** Primer sequences.

| Gene                                                                               | Sequence                                                    | Amplicon (bp) | Accession number               |
|------------------------------------------------------------------------------------|-------------------------------------------------------------|---------------|--------------------------------|
| <b>Peroxisome proliferator activated receptor gamma (PPAR-<math>\gamma</math>)</b> | Fwd: ATCTTAAGTCCGGATCCAC<br>Rev: CAAACCTGATGGCATTGTGAG      | 102           | <a href="#">NM_001127330.2</a> |
| <b>Peroxisome proliferator activated receptor alpha (PPAR-<math>\alpha</math>)</b> | Fwd: TGCAATTCGCTTTGGAAGAA<br>Rev: CTTGCCCAGAGATTTGAGGT      | 118           | <a href="#">NM_011144.6</a>    |
| <b>Fat acid synthase (FAS)</b>                                                     | Fwd: GATTCGGTGTATCCTGCTGTC<br>Rev: CATGCTTTAGCACCTGCTGT     | 95            | <a href="#">NM_007988.3</a>    |
| <b>Lipoprotein lipase (LPL)</b>                                                    | Fwd: GTCTGGCTGACACTGGACAAA<br>Rev: CCCACTTTCAAACACCCAAA     | 122           | <a href="#">NM_008509.2</a>    |
| <b>CD36 molecule (CD36)</b>                                                        | Fwd: GATGAATGGTTGAGACCCCG<br>Rev: GCTCCACACATTTCAAGAAGGC    | 174           | <a href="#">NM_001159558.1</a> |
| <b>Mannose receptor (CD206)</b>                                                    | Fwd: CTGTGTTTCTGCTATTGGACGC<br>Rev: CGGAATTTCTGGGATTCAGCTTC | 133           | <a href="#">NM_008625.2</a>    |
| <b>Integrin alpha X (CD11C)</b>                                                    | Fwd: CTGGATAGCCTTTCTTCTGCTG<br>Rev: GCACACTGTGTCCGAAGTCA    | 113           | <a href="#">NM_021334.3</a>    |
| <b>Adhesion G protein-coupled receptor E1 (F4/80)</b>                              | Fwd: AACATGCAACCTGCCACAAC<br>Rev: TTCACAGGATTCGTCCAGGC      | 110           | <a href="#">NM_010130.4</a>    |
| <b>Fatty acid-binding protein 4 (FABP4)</b>                                        | Fwd: CGCAGACGACAGGAAGGT<br>Rev: TTCCATCCCCTTCTGCAC          | 77            | <a href="#">NM_024406.3</a>    |
| <b>Ribosomal protein L19 (RPL19)</b>                                               | Fwd: CAATGCCAACTCCCGTCA<br>Rev: GTGTTTTTCCGGCAACGAG         | 102           | <a href="#">NM_009078.2</a>    |
| <b>Adrenergic receptor, beta 1 (<math>\beta</math>1AR)</b>                         | Fwd: CATCATGGGTGTGTTTACG<br>Rev: GAAGACGAAGAGGCGATCC        | 100           | <a href="#">NM_007419.3</a>    |
| <b>Adrenergic receptor, beta 2 (<math>\beta</math>2AR)</b>                         | Fwd: AGGCATGGAAGGCTTTGTGA<br>Rev: TATTACAGTGCGAGTCATT       | 99            | <a href="#">NM_007420.3</a>    |
| <b>Adrenergic receptor, beta 3 (<math>\beta</math>3AR)</b>                         | Fwd: ACCCTGATGATCGACATGTTCC<br>Rev: GCCATAGTGAGGAGACAGGG    | 129           | <a href="#">NM_013462.3</a>    |
| <b>Neprilysin (NEP)</b>                                                            | Fwd: CCTGAACTTTGCCAGGTGT<br>Rev: GCGGCAATGAAAGGCATCTG       | 148           | <a href="#">NM_001289462.1</a> |
| <b>Angiotensin I converting enzyme (ACE1)</b>                                      | Fwd: ACCCTAGGACCTGCCAATCT<br>Rev: CGTGAGGAAGCCAGGATGTT      | 164           | <a href="#">NM_020762.5</a>    |
| <b>Prolyl oligopeptidase (POP)</b>                                                 | Fwd: GGGTGCTCCGACACTAAACA<br>Rev: GACGGGTACTGGATGTCGTC      | 98            | <a href="#">NM_011156.3</a>    |
| <b>Insulin degrading enzyme (IDE)</b>                                              | Fwd: GTCCATGTTCTTGCCAGGGA<br>Rev: TTCACGAGGGGAAACAGTGG      | 161           | <a href="#">NM_031156.3</a>    |
| <b>Dipeptidylpeptidase 4 (DPP4)</b>                                                | Fwd: GACGGCAGAGGAAGTGGTT<br>Rev: CGCTTGCTATCCACAAATCCC      | 134           | <a href="#">NM_010074.3</a>    |
| <b>Proteasome subunit beta 5 (Prot<math>\beta</math>5)</b>                         | Fwd: CCAAAGTCTCGCTAACATGG<br>Rev: GTTCCCCTCGCTGTCTACG       | 119           | <a href="#">NM_011186.1</a>    |

**Supplemental Table S2.** Schematic distribution of “May” peptidomic samples.

| Samples | Light 1                  | Light 2                  | Intermediary             | Heavy                    |
|---------|--------------------------|--------------------------|--------------------------|--------------------------|
| May 1   | WT/SD                    | WT/HD                    | THOP1 <sup>-/-</sup> /SD | THOP1 <sup>-/-</sup> /HD |
| May 2   | THOP1 <sup>-/-</sup> /HD | THOP1 <sup>-/-</sup> /SD | WT/HD                    | WT/SD                    |
| May 3   | WT/HD                    | WT/SD                    | THOP1 <sup>-/-</sup> /HD | THOP1 <sup>-/-</sup> /SD |
| May 4   | THOP1 <sup>-/-</sup> /SD | THOP1 <sup>-/-</sup> /HD | WT/SD                    | WT/HD                    |
| May 5   | WT/SD                    | WT/HD                    | THOP1 <sup>-/-</sup> /SD | THOP1 <sup>-/-</sup> /HD |
| May 6   | THOP1 <sup>-/-</sup> /HD | THOP1 <sup>-/-</sup> /SD | WT/HD                    | WT/SD                    |
| May 7   | WT/HD                    | WT/SD                    | THOP1 <sup>-/-</sup> /HD | THOP1 <sup>-/-</sup> /SD |
| May 8   | THOP1 <sup>-/-</sup> /SD | THOP1 <sup>-/-</sup> /HD | WT/SD                    | WT/HD                    |
| May 9   | WT/SD                    | WT/HD                    | THOP1 <sup>-/-</sup> /SD | THOP1 <sup>-/-</sup> /HD |
| May 10  | THOP1 <sup>-/-</sup> /HD | THOP1 <sup>-/-</sup> /SD | WT/HD                    | WT/SD                    |

**Footnotes:** A total of 20 µg of peptides were extracted from inguinal adipose tissue ( $n = 5$  for each group); 5 µg of peptides from each group were labeled with isotope, as follows:

- Light 1: Add 28 Da of mass per each amino group (N-terminal) and/or Lys residue(s): chemical formula of isotope =  $(CH_3)_2-N-R$
- Light 2: Add 30 Da of mass per each amino group (N-terminal) and/or Lys residue(s): chemical formula of isotope =  $(CDH_2)_2-N-R$
- Intermediary: Add 32 Da of mass per each amino group (N-terminal) and/or Lys residue(s): chemical formula of isotope =  $(CHD_2)_2-N-R$
- Heavy: Add 36 Da of mass per each amino group (N-terminal) and/or Lys residue(s): chemical formula of isotope =  $(^{13}CD_3)_2-N-R$

Samples are from male WT or THOP1<sup>-/-</sup> mice (PROTX gene knockout animals on C57BL6 genetic background).

For each experimental group, there were 5 animals, and each group was treated according to 4 different protocols (SD or HD, WT or THOP1<sup>-/-</sup>), and all were labeled in duplicates (labeling was done in “forward” and “reverse” for each group):

- Group WT/SD,  $n = 5$
- Group WT/HD,  $n = 5$
- Group THOP1<sup>-/-</sup>/SD,  $n = 5$
- Group THOP1<sup>-/-</sup>/HD,  $n = 5$

Supplemental Table S3. Complete data analyses for the identified intracellular peptides

| Precursor Protein name              | Peptide sequence    | RT   | L1 m/z    | L2 m/z    | L m/z     | H m/z     | z | T | Avg. mass | SD   | Obs. mass | Theor. mass | ppm  |
|-------------------------------------|---------------------|------|-----------|-----------|-----------|-----------|---|---|-----------|------|-----------|-------------|------|
| Macrophage migration inhib. factor  | LSELTQQLAQATGKPAQ   | 64.7 | 920.5638  | 922.5580  | 924.5377  | 928.55860 | 2 | 2 | 1783.0083 | 0.04 | 1783.0083 | 1782.9549   | 29.9 |
| Histone H2A type 1-B                | AQGGVLPNIQAVLLPK    | 96.9 | 837.5191  | 839.5303  | 841.5442  | 845.5635  | 2 | 2 | 1616.9778 | 0.02 | 1616.9778 | 1616.9687   | 5.6  |
| Histone H2B type 2-B                | KQVHPDTGISSKAMGImNS | 37.6 | 701.0305  | 703.0540  | 705.0552  | 709.0762  | 3 | 3 | 2016.0107 | 0.04 | 2016.0107 | 2015.9792   | 15.6 |
| Elongation factor 2                 | ASVLTAQPRIMEPI      | 80.1 | 777.4376  | 778.4376  | 779.4517  | 781.4618  | 2 | 1 | 1524.8360 | 0.01 | 1524.8360 | 1524.8407   | -3.1 |
| Creatine kinase M-type              | DISNADRLGSSEVE/Q    | 49.1 | 824.4038  | 825.4003  | 826.4043  | 828.4151  | 2 | 1 | 1618.7534 | 0.01 | 1618.7534 | 1618.66     | 57.7 |
| Creatine kinase M-type              | DISNADRLGSSEVE/QV   | 59.5 | 873.929   | 874.9346  | 875.9405  | 877.9507  | 2 | 1 | 1717.8190 | 0.01 | 1717.8190 | 1717.8191   | -0.1 |
| Creatine kinase M-type              | IDDHFLFDKVP/PLL     | 99.3 | 906.50320 | 908.51070 | 910.52580 | 914.5468  | 2 | 2 | 1754.9425 | 0.02 | 1754.9425 | 1754.9316   | 6.2  |
| Apolipoprotein A-I                  | LETLKTQVOSVIDKA     | 73.2 | 586.3524  | 588.3640  | 590.3767  | 594.3958  | 3 | 3 | 1671.9655 | 0.04 | 1671.9655 | 1671.948    | 10.5 |
| Apolipoprotein A-II                 | FSSLMNLEEKPAAPAA    | 71.5 | 830.9321  | 832.9461  | 834.9584  | 838.9783  | 2 | 2 | 1603.8067 | 0.02 | 1603.8067 | 1603.7989   | 4.8  |
| Apolipoprotein A-II                 | HEQLTPLVRSAGTSLVN   | 60.0 | 925.5099  | 926.5137  | 927.5212  | 929.5321  | 2 | 1 | 1820.9801 | 0.01 | 1820.9801 | 1820.9817   | -0.9 |
| Serum albumin                       | SQTFNADFAEITKL      | 93.2 | 869.46    | 871.4683  | 873.4811  | 877.4998  | 2 | 2 | 1680.8538 | 0.02 | 1680.8538 | 1680.8432   | 6.3  |
| Non-specific lipid-transfer protein | ADSDLLALMTGKMNPQSA  | 99.0 | 959.9837  | 961.9929  | 964.0899  | 968.0289  | 2 | 2 | 1861.9469 | 0.10 | 1861.9469 | 1861.8987   | 25.9 |
| Hemoglobin subunit alpha            | GAELERMFASFPPTK     | 87.8 | 906.5109  | 908.4832  | 910.4923  | 914.5168  | 2 | 2 | 1754.9008 | 0.03 | 1754.9008 | 1754.834    | 38.1 |
| Hemoglobin subunit alpha            | FDVSHGSAQVK         | 24.6 | 615.8264  | 617.839   | 619.8522  | 623.8708  | 2 | 2 | 1173.5936 | 0.02 | 1173.5936 | 1173.5851   | 7.2  |
| Hemoglobin subunit alpha            | IGGHGAEYGAELER      | 39.5 | 779.3855  | 780.3916  | 781.3956  | 783.4088  | 2 | 1 | 1528.7324 | 0.01 | 1528.7324 | 1528.7343   | -1.3 |
| Hemoglobin subunit alpha            | SVSTVLTSK           | 35.3 | 489.298   | 491.3106  | 493.3228  | 497.342   | 2 | 2 | 920.5359  | 0.02 | 920.5359  | 920.5251    | 11.7 |
| Acyl-CoA-binding protein            | QATVGDVNTDRPGLDLKGK | 58.5 | 727.7425  | 729.7576  | 731.7711  | 735.7884  | 3 | 3 | 2096.1435 | 0.04 | 2096.1435 | 2096.1299   | 6.5  |

RT = retention time; m= methionine oxidized; L1 or L2 = Light; I = Intermediary; H = Heavy; z = charge; T = number of tags; SD = standard deviation.

**Supplemental Fig. S1. Gewehr et al.**

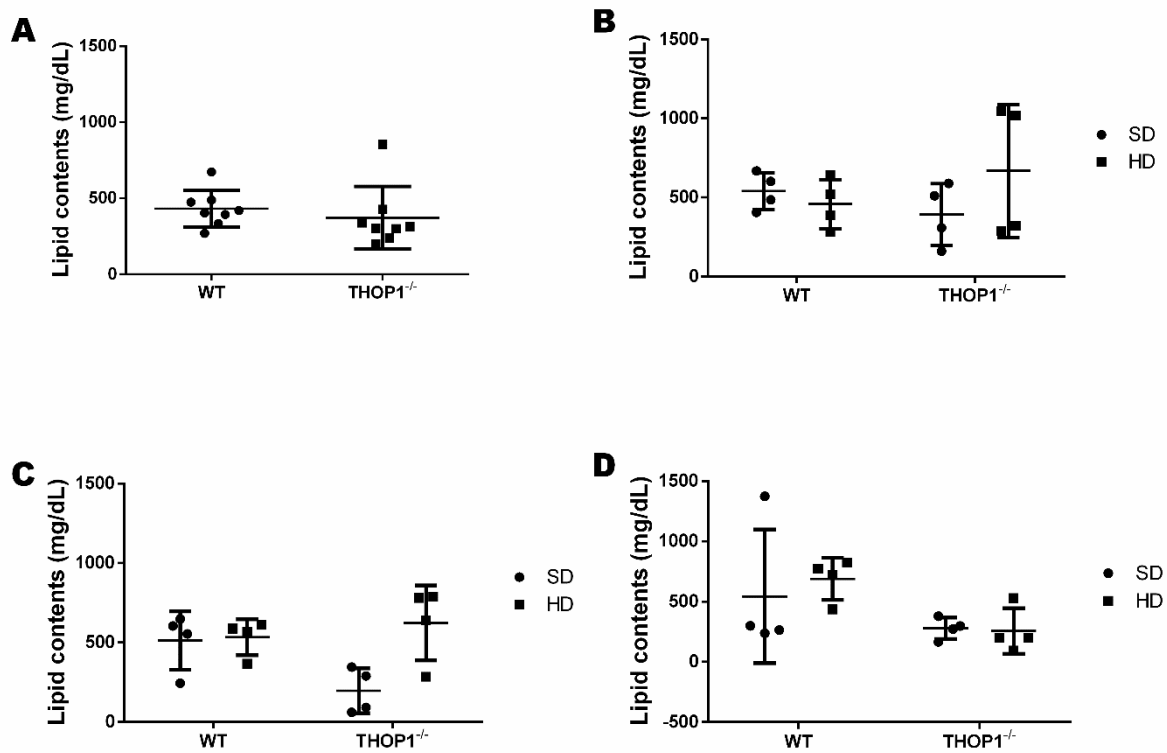

**Supplemental Figure S1.** Quantification of lipid content in animal feces: (A) before diet started, (B) after 6 weeks of the diet, (C) after 12 weeks of the diet, and (D) after 24 weeks of the diet. Determination of the lipid content in animal feces was performed by extraction using an organic solvent (*n* = 4). Results are expressed as mean ± SEM. Statistical analyses were performed using Student's unpaired *t*-test (*n* = 4).

**Supplemental Fig S2. Gewehr et al.**

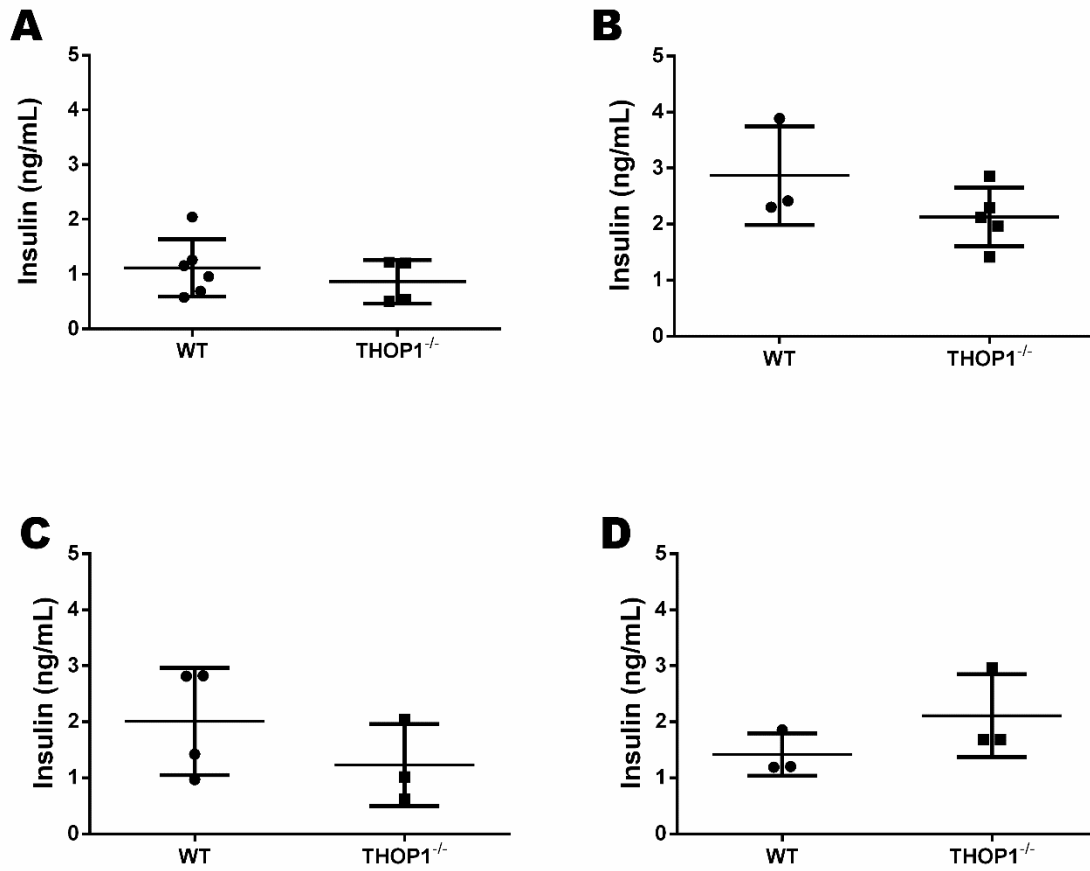

**Supplemental Figure S2.** Pre-prandial insulin levels of female (A,C) and male (B,D) mice, WT or THOP1<sup>-/-</sup>, were evaluated in animals fasted for 10 h (A,B) or 4 h (C,D). Experimental details are shown in the Methods section. Note that no differences were observed in the insulin levels among WT or THOP1<sup>-/-</sup> mice ( $n = 3-4$ ).

**Supplemental Figure S3. Gewehr et al.**

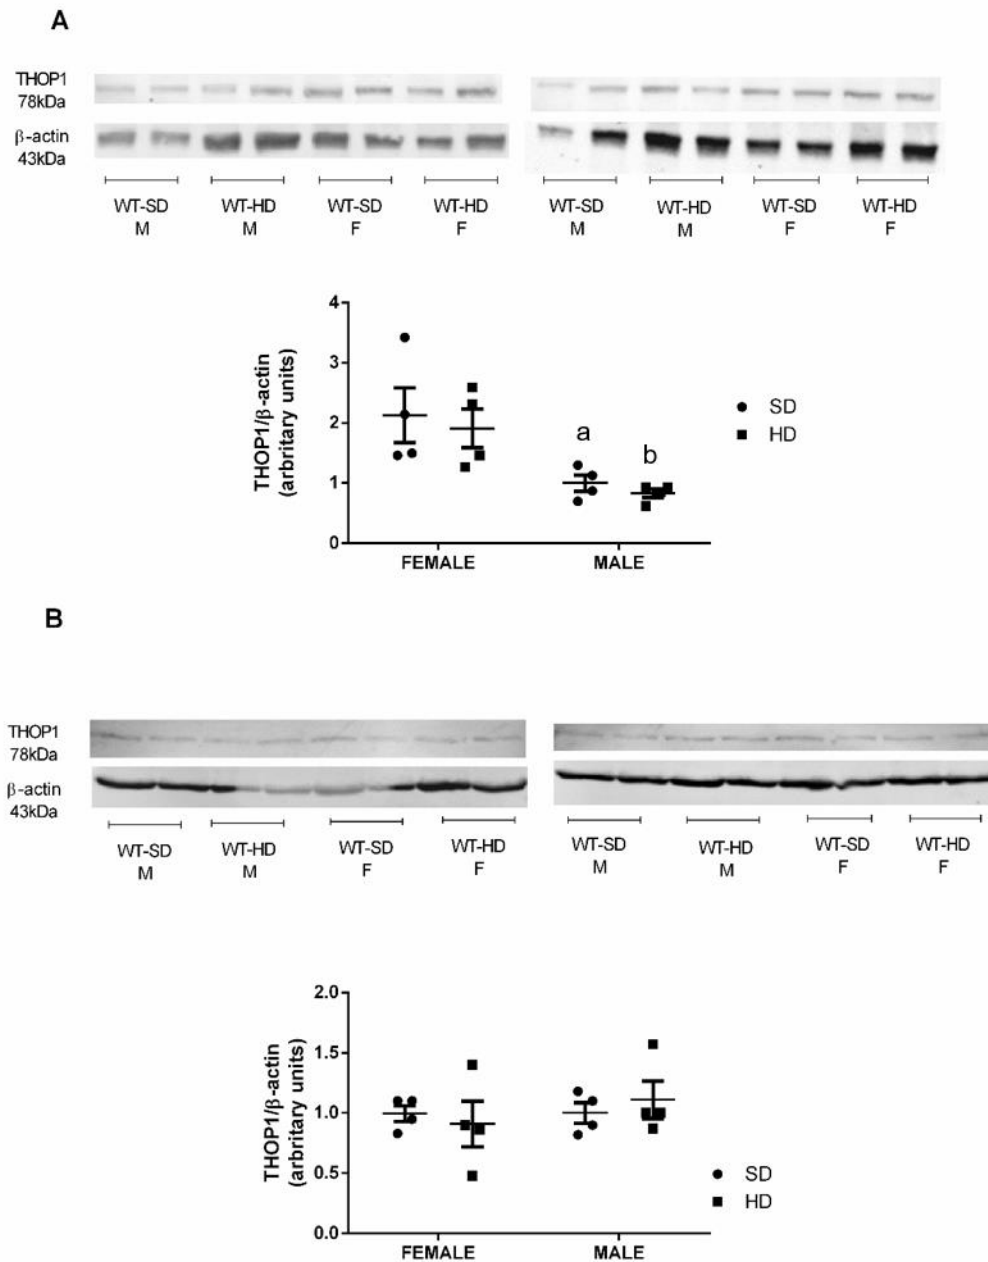

**Supplemental Figure S3.** Western blots show immunoreactivity for THOP1 and beta-actin on adipose (A) and liver (B) tissue homogenates from WT animals. Note, no differences were observed in THOP1 expression levels among the groups ( $n = 4$ ). M, male; F, female. Results are expressed as mean  $\pm$  SEM. Statistical analyses were conducted using Student's unpaired  $t$ -test. One letter,  $p \leq 0.05$ ; a, female WT/SD vs. male WT/SD; b, female WT/HD vs. male WT/HD ( $n = 4$ ).

Supplemental Figure S4. Gewehr et al.

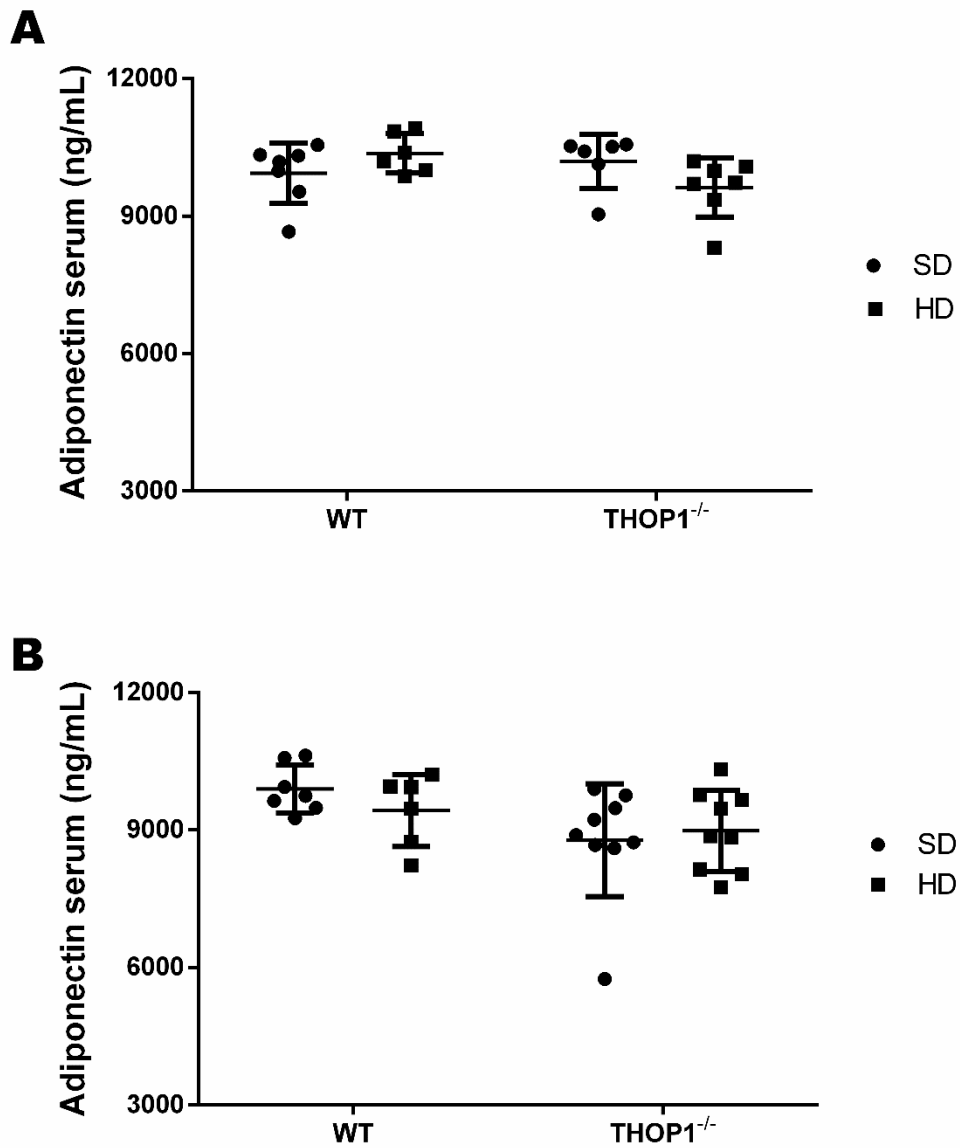

**Supplemental Figure S4.** Adiponectin levels of female (A) and male (B) mice were evaluated after 10 h of food restriction (pre-prandial). Experimental details are shown in the Methods section. Note that no differences were observed in adiponectin levels among the WT or THOP1<sup>-/-</sup> groups ( $n = 6-9$ ).

Supplemental Fig S5. Gewehr et al.

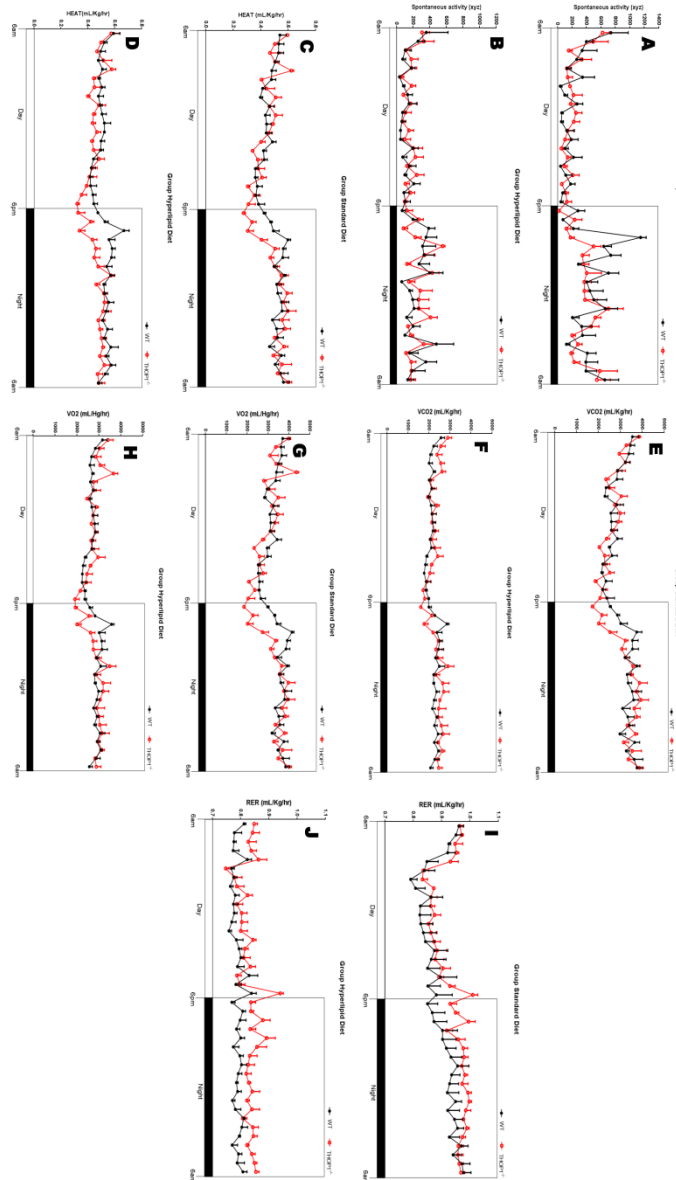

**Supplemental Figure S5.** Resting energy metabolism of WT (black lanes) or THOP1<sup>-/-</sup> (red lanes) male mice across 24 h. Panels: (A,B) spontaneous locomotor activity; (C,D) heat production; (E,F) VCO<sub>2</sub> (mL/kg/h) production; (G,H) VO<sub>2</sub> (mL/kg/h) consumption; (I,J) respiratory exchange ratios (RER). Panels: (A,C,E,G,I) mice were fed an SD; (B,D,F,H,J) mice were fed a HD. Statistical analyses are shown in Fig 5 ( $n = 4$ ). Note that an RER of 0.7 indicates that fat is the predominant fuel source, a value of 1.0 is indicative of carbohydrate being the predominant fuel source, and a value between 0.7 and 1.0 suggests a mix of both fat and carbohydrate (Kenney, W. Larry. (2012). Physiology of sport and exercise. Wilmore, Jack H., 1938–2014., Costill, David L., Wilmore, Jack H., 1938–2014. 5th ed., Champaign, IL: Human Kinetics. pp. 117–118. ISBN 9780736094092).

Supplemental Fig S6. Gewehr et al.

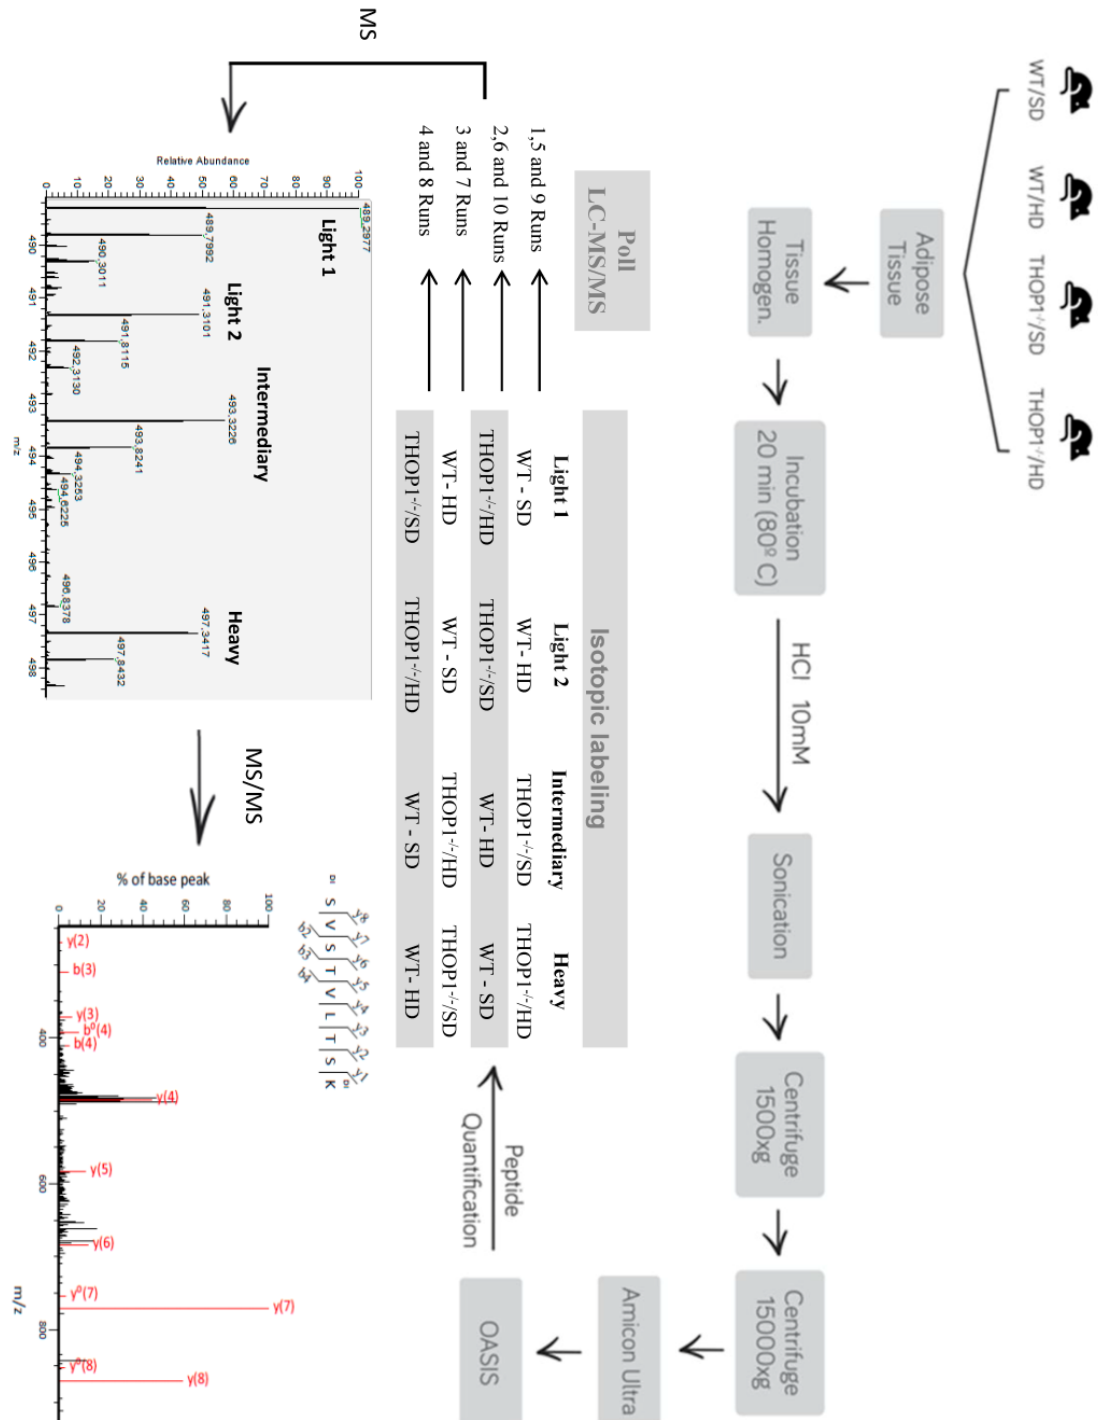

**Supplemental Figure S6.** Schematic representation to illustrate the semi-quantitative peptidomic analyses. Experimental details are presented in the Methods section.
